# Supplementary material for: Syntheses, structures, and stabilities of aliphatic and aromatic fluorous iodine(I) and iodine(III) compounds: the role of iodine Lewis basicity
Source: publisher site journal article supplement (doi:10.3762/bjoc.13.246), 2017-11-23
Supplement: Additional file 1 [file 1860-5397-13-246-S1.pdf]

## **Supporting Information for**

### **Syntheses, structures, and stabilities of aliphatic and aromatic fluorous iodine(I) and iodine(III) compounds: the role of iodine Lewis basicity**

Tathagata Mukherjee<sup>1§</sup>, Soumik Biswas<sup>1</sup>, Andreas Ehnbohm<sup>1</sup>, Subrata K. Ghosh<sup>1</sup>, Ibrahim El-Zoghbi<sup>2</sup>, Nattamai Bhuvanesh<sup>1</sup>, Hassan S. Bazzi<sup>\*2</sup> and John A. Gladysz<sup>\*1</sup>

Address: <sup>1</sup>Department of Chemistry, Texas A&M University, P.O. Box 30012, College Station, Texas, 77842-3012, USA, and <sup>2</sup>Department of Chemistry, Texas A&M University at Qatar, P.O. Box 23874, Doha, Qatar

#### **\*Corresponding author**

Email: Hassan S. Bazzi - [bazzi@tamu.edu](mailto:bazzi@tamu.edu); John A. Gladysz - [gladysz@mail.chem.tamu.edu](mailto:gladysz@mail.chem.tamu.edu)

§Present address: Dr. Tathagata Mukherjee, Intel Corporation, Hillsboro, Oregon.

**Experimental section continued**

**General.** Reactions and workups were carried out in air unless noted or Schlenk ware is specified. NMR spectra were recorded on standard FT spectrometers and referenced as follows ( $\delta$  in ppm):  $^1\text{H}$ , residual internal  $\text{CHCl}_3$  (7.26),  $\text{CH}_2\text{Cl}_2$  (5.32), or acetone- $d_5$  (2.05);  $^{13}\text{C}\{^1\text{H}\}$ , internal  $\text{CDCl}_3$  (77.0),  $\text{CD}_2\text{Cl}_2$  (53.8), acetone- $d_6$  (29.9), or  $\text{C}_6\text{F}_6$  (140.0);  $^{19}\text{F}\{^1\text{H}\}$ , internal  $\text{C}_6\text{F}_6$  (−164.9) or 1,3,5-( $\text{CF}_3$ ) $_2\text{C}_6\text{H}_3\text{Br}$  (−63.6). IR spectra were recorded using a Shimadzu IRAffinity-1 spectrometer with a Pike MIRacle ATR system (diamond/ZnSe crystal). Microanalyses were performed by Atlantic Microlab.

Solvents were treated as follows: hexanes,  $\text{Et}_2\text{O}$ , and  $\text{CH}_2\text{Cl}_2$ , dried and degassed using a Glass Contour solvent purification system;  $\text{CF}_3\text{C}_6\text{H}_5$  (Sigma Aldrich, 99%), handled under  $\text{N}_2$ ;  $\text{CH}_3\text{CN}$ , distilled from  $\text{CaH}_2$ ;  $\text{MeOH}$  (BDH, 99.8%); ethylacetate (BDH, ACS grade), acetone (BDH, ACS grade), petroleum ether (BDH, ACS grade), perfluorohexane (FC-72; SynQuest Laboratories), perfluoroheptane (FC-77; SynQuest Laboratories),  $\text{CF}_3\text{C}_6\text{F}_{11}$  (SynQuest Laboratories),  $\text{C}_6\text{F}_6$  (TCI, >99%), and all deuterated solvents (Cambridge Isotope Laboratories), used as received (some samples of acetone- $d_6$  were wet).

Chemicals were used as follows: anhydrous pyridine (Sigma Aldrich sure/sealed, 99.8%), handled under  $\text{N}_2$ ; aqueous  $\text{NaOCl}$  (Ricca Chemical Company, ca. 2.5% w/w), stored in a refrigerator;  $\text{Tf}_2\text{O}$  (Sigma Aldrich,  $\geq 99\%$ ), stored in a glove box; fluorosulfonates or alcohols ( $\text{R}_{\text{fn}}\text{I}$ ,  $\text{R}_{\text{fn}}\text{CH}_2\text{OH}$ ,  $\text{R}_{\text{fOx}}\text{CH}_2\text{OH}$ ; SynQuest Laboratories, 97-99%), trifluoroacetic acid (Alfa Aesar, 99%),  $\text{CH}_3\text{CO}_2\text{H}$  (BDH, ACS grade), conc.  $\text{HCl}$  (12 N, Macron/ACS grade),  $\text{H}_2\text{SO}_4$  (36 N, BDH/ACS grade), fuming  $\text{H}_2\text{SO}_4$  (Alfa Aesar),  $\text{N}$ -iodosuccinimide (NIS; Alfa Aesar, 97%),  $\text{NaI}$  (EMD, ACS grade),  $\text{H}_5\text{IO}_6$  (Alfa Aesar, 99%),  $\text{Ph}_2\text{SiMe}_2$  (>97%, TCI) and silica (SiliaFlash® F60, 230-400 mesh), used as purchased.

**$\text{R}_{\text{f11}}\text{CH}_2\text{OTf}$ .** A Schlenk flask was flame dried, allowed to cool, charged with  $\text{R}_{\text{f11}}\text{CH}_2\text{OH}$  (5.10 g, 8.52 mmol) and anhydrous  $\text{CF}_3\text{C}_6\text{H}_5$  (50 mL) under a  $\text{N}_2$  flow, capped, and placed in an ice bath. Then pyridine (1.0 mL, 1.0 g, 13 mmol) and (after 30 min)  $\text{Tf}_2\text{O}$  (3.0 mL, 5.3 g, 14 mmol) were added dropwise by syringe with stirring. The ice bath was allowed to warm to room temperature. After 16 h,  $\text{H}_2\text{O}$  (60 mL) was added. After 30 min, the organic phase was

separated and dried (MgSO<sub>4</sub>). The solvent was removed by rotary evaporation. The residue was dissolved in petroleum ether/ethyl acetate (4:1 v/v). The solution was filtered through a silica pad (3 × 5 cm) and the solvent was removed by rotary evaporation to give R<sub>f11</sub>CH<sub>2</sub>OTf as a white solid (3.82 g, 5.21 mmol, 61%), mp 77.2-79.9 °C (capillary). Anal. Calcd for C<sub>13</sub>H<sub>2</sub>F<sub>26</sub>O<sub>3</sub>S: C 21.33, H 0.28, F 67.46, S 4.38. Found C 21.44, H 0.31, F 67.21, S 4.15.

NMR ( $\delta$  in ppm): <sup>1</sup>H (acetone-*d*<sub>6</sub>, 500 MHz) 5.55 (t, <sup>3</sup>J<sub>HF</sub> = 13 Hz, 2H, CH<sub>2</sub>); <sup>19</sup>F{<sup>1</sup>H} (acetone-*d*<sub>6</sub>, 470 MHz) -75.5 (s, 3F, SO<sub>2</sub>CF<sub>3</sub>), -81.7 (t, <sup>4</sup>J<sub>FF</sub> = 10 Hz [s1-s3], 3F, CF<sub>3</sub>), -120.2 (m, 2F, CF<sub>2</sub>), -122.2 (m, 12F, 6CF<sub>2</sub>), -123.2 (m, 4F, 2CF<sub>2</sub>), -126.7 (m, 2F, CF<sub>2</sub>); <sup>13</sup>C{<sup>1</sup>H} (acetone-*d*<sub>6</sub>, 125 MHz, partial) 70.0 (t, <sup>2</sup>J<sub>CF</sub> = 28 Hz, CH<sub>2</sub>). IR (powder film, cm<sup>-1</sup>): 2924 (w), 2855 (w), 1418 (m), 1202 (s), 1140 (s), 1103 (w), 1023 (m), 854 (m), 822 (m).

**R<sub>f13</sub>CH<sub>2</sub>OTf.** R<sub>f13</sub>CH<sub>2</sub>OH (6.50 g, 9.29 mmol), anhydrous CF<sub>3</sub>C<sub>6</sub>H<sub>5</sub> (50 mL), C<sub>6</sub>F<sub>6</sub> (10 mL), pyridine (1.2 mL, 1.1 g, 14 mmol), and (after 2 h) Tf<sub>2</sub>O (3.5 mL, 5.8 g, 15 mmol) were combined in a procedure analogous to that for R<sub>f11</sub>CH<sub>2</sub>OTf. A similar workup (24 h prior to H<sub>2</sub>O addition; drying with Na<sub>2</sub>SO<sub>4</sub>) gave R<sub>f13</sub>CH<sub>2</sub>OTf as a white solid (4.64 g, 5.57 mmol, 60%) mp 105.3-106.3 °C (capillary). Anal. Calcd for C<sub>15</sub>H<sub>2</sub>F<sub>30</sub>O<sub>3</sub>S: C 21.65, H 0.24, S 3.85. Found C 21.71, H 0.18, S 3.71.

NMR ( $\delta$  in ppm): <sup>1</sup>H (acetone-*d*<sub>6</sub>, 500 MHz) 5.55 (t, <sup>3</sup>J<sub>HF</sub> = 13 Hz, 2H, CH<sub>2</sub>); <sup>19</sup>F{<sup>1</sup>H} (acetone-*d*<sub>6</sub>, 470 MHz) -75.5 (s, 3F, SO<sub>2</sub>CF<sub>3</sub>), -81.6 (t, <sup>4</sup>J<sub>FF</sub> = 10 Hz [s1-s3], 3F, CF<sub>3</sub>), -120.2 (m, 2F, CF<sub>2</sub>), -122.2 (m, 16F, 8CF<sub>2</sub>), -123.3 (m, 4F, 2CF<sub>2</sub>), -126.8 (m, 2F, CF<sub>2</sub>); <sup>13</sup>C{<sup>1</sup>H} (C<sub>6</sub>F<sub>6</sub>, 125 MHz, partial) 68.6 (t, <sup>2</sup>J<sub>CF</sub> = 27 Hz, CH<sub>2</sub>). IR (powder film, cm<sup>-1</sup>): 3000 (w), 2960 (w), 1418 (m), 1204 (s), 1142 (s), 1081 (w), 1028 (m), 893 (w), 824 (m).

**R<sub>f15</sub>CH<sub>2</sub>OTf.** A Schlenk flask was flame dried, allowed to cool, charged with R<sub>f15</sub>CH<sub>2</sub>-OH (10.0 g, 12.5 mmol) and anhydrous CF<sub>3</sub>C<sub>6</sub>H<sub>5</sub> (50 mL) under a N<sub>2</sub> flow, and capped. Then pyridine (1.50 mL, 1.47 g, 18.6 mmol) and (after 1 d) Tf<sub>2</sub>O (4.50 mL, 7.61 g, 27.0 mmol) were added dropwise by syringe with stirring. After 1 d, H<sub>2</sub>O (180 mL) was added. The mixture was filtered (filtrate = A). The filter cake was washed with acetone (10 mL) and this filtrate was discarded. The remaining filter cake was transferred to a round bottom flask and taken up in CF<sub>3</sub>C<sub>6</sub>-

H<sub>5</sub> (75 mL) with stirring. After 30 min, this mixture was filtered. This filtrate was combined with the original filtrate (A) and dried (Na<sub>2</sub>SO<sub>4</sub>). The solvent was removed by rotary evaporation, and hexanes/ethyl acetate (4:1 v/v, 500 mL) was added. The flask was placed in a 50 °C oil bath. The mixture was stirred until the solid completely dissolved. The solution was kept at –35 °C until a precipitate formed. After 8-9 h, the solid was collected by filtration and washed with cold hexanes to give R<sub>f15</sub>CH<sub>2</sub>OTf as a white solid (2.61 g, 2.80 mmol, 22%), mp 127.4-128.2 °C (capillary). Anal. Calcd for C<sub>17</sub>H<sub>2</sub>F<sub>34</sub>O<sub>3</sub>S: C 21.90, H 0.22, F 69.29, S 3.44. Found C 21.01, H 0.13, F 66.62, S 3.52 [s4].

NMR ( $\delta$  in ppm): <sup>1</sup>H (acetone-*d*<sub>6</sub>, 500 MHz) 5.48 (t, <sup>3</sup>J<sub>HF</sub> = 13 Hz, 2H, CH<sub>2</sub>); <sup>19</sup>F{<sup>1</sup>H} (acetone-*d*<sub>6</sub>, 470 MHz) –75.5 (s, 3F, SO<sub>2</sub>CF<sub>3</sub>), –81.6 (t, <sup>4</sup>J<sub>FF</sub> = 10 Hz [s1-s3], 3F, CF<sub>3</sub>), –120.2 (m, 2F, CF<sub>2</sub>), –122.1 (m, 20F, 10CF<sub>2</sub>), –123.2 (m, 4F, 2CF<sub>2</sub>), –126.7 (m, 2F, CF<sub>2</sub>); <sup>13</sup>C{<sup>1</sup>H} (acetone-*d*<sub>6</sub>/C<sub>6</sub>F<sub>6</sub>, 125 MHz, partial) 68.6 (t, <sup>2</sup>J<sub>CF</sub> = 28 Hz, CH<sub>2</sub>). IR (powder film, cm<sup>–1</sup>): 2922 (w), 2855 (w), 1418 (m), 1204 (s), 1144 (s), 1099 (w), 1028 (m), 872 (w), 825 (m).

**R<sub>f11</sub>CH<sub>2</sub>I.** A round bottom flask was charged with R<sub>f11</sub>CH<sub>2</sub>OTf (3.01 g, 4.11 mmol), NaI (10.2 g, 68.0 mmol), and acetone (30 mL), and fitted with a condenser. The flask was placed in a 75 °C oil bath and the mixture was stirred. After 1 d, the bath was removed and the mixture was allowed to cool. The solvent was removed by rotary evaporation. Then Et<sub>2</sub>O (50 mL) and H<sub>2</sub>O (40 mL) were added with stirring. After 5 min, the dark brown organic phase was separated, washed with saturated aqueous Na<sub>2</sub>S<sub>2</sub>O<sub>3</sub> until it became colorless, and dried (Na<sub>2</sub>SO<sub>4</sub>). The solvent was removed by rotary evaporation and the residue was dissolved in hexanes/ethyl acetate (20:1 v/v). The solution was kept at –35 °C until a precipitate formed. The solid was collected by filtration and washed with cold hexanes to give R<sub>f11</sub>CH<sub>2</sub>I as a white solid (2.00 g, 2.82 mmol, 69%), mp (capillary): 97.8-98.2 °C. Anal. Calcd for C<sub>12</sub>H<sub>2</sub>F<sub>23</sub>I: C 20.30, H 0.28, F 61.54, I 17.87. Found: C 20.20, H 0.16, F 61.29, I 17.68.

NMR ( $\delta$  in ppm, acetone-*d*<sub>6</sub>): <sup>1</sup>H (500 MHz) 4.06 (t, <sup>3</sup>J<sub>HF</sub> = 19 Hz, 2H, CH<sub>2</sub>); <sup>19</sup>F{<sup>1</sup>H} (470 MHz) –81.6 (t, <sup>4</sup>J<sub>FF</sub> = 10 Hz [s1-s3], 3F, CF<sub>3</sub>), –107.0 (m, 2F, CF<sub>2</sub>), –122.2 (m, 14F, 7CF<sub>2</sub>), –123.2 (m, 2F, CF<sub>2</sub>), –126.7 (m, 2F, CF<sub>2</sub>); <sup>13</sup>C{<sup>1</sup>H} (125 MHz, partial) –3.8 (t, <sup>2</sup>J<sub>CF</sub> =

25 Hz, CH<sub>2</sub>). IR (powder film, cm<sup>-1</sup>): 2986 (w), 2874 (w), 1422 (w), 1373 (w), 1348 (w), 1234 (s), 1200 (s), 1140 (s), 1040 (m), 858 (m).

**R<sub>f13</sub>CH<sub>2</sub>I.** A sample of R<sub>f13</sub>CH<sub>2</sub>OTf (0.335 g, 0.403 mmol), NaI (3.59 g, 23.9 mmol), and acetone (8 mL) were combined in a procedure analogous to that for R<sub>f11</sub>CH<sub>2</sub>I. A similar workup (Et<sub>2</sub>O/30 mL and H<sub>2</sub>O/20 mL; after the addition of hexanes/ethyl acetate, the flask was placed in a 50 °C oil bath and the mixture stirred until the solid completely dissolved) gave R<sub>f13</sub>-CH<sub>2</sub>I as a white solid (0.190 g, 0.235 mmol, 58%), mp 124.4-124.9 °C (capillary). Anal. Calcd for C<sub>14</sub>H<sub>2</sub>F<sub>27</sub>I: C 20.76, H 0.25, F 63.33, I 15.67. Found C 20.81, H 0.20, F 63.33, I 15.48.

NMR ( $\delta$  in ppm): <sup>1</sup>H (acetone-*d*<sub>6</sub>, 500 MHz) 4.06 (t, <sup>3</sup>J<sub>HF</sub> = 19 Hz, 2H, CH<sub>2</sub>); <sup>19</sup>F{<sup>1</sup>H} (acetone-*d*<sub>6</sub>, 470 MHz) -81.7 (t, <sup>4</sup>J<sub>FF</sub> = 10 Hz [s1-s3], 3F, CF<sub>3</sub>), -107.0 (m, 2F, CF<sub>2</sub>), -122.2 (m, 18F, 9CF<sub>2</sub>), -123.2 (m, 2F, CF<sub>2</sub>), -126.7 (m, 2F, CF<sub>2</sub>); <sup>13</sup>C{<sup>1</sup>H} (C<sub>6</sub>F<sub>6</sub>, 125 MHz, partial) -7.0 (t, <sup>2</sup>J<sub>CF</sub> = 26 Hz, CH<sub>2</sub>). IR (powder film, cm<sup>-1</sup>): 1422 (w), 1375 (w), 1354 (w), 1201 (s), 1144 (s), 1045 (m), 812 (m).

**R<sub>f15</sub>CH<sub>2</sub>I.** A sample of R<sub>f15</sub>CH<sub>2</sub>OTf (0.282 g, 0.303 mmol), NaI (1.45 g, 9.67 mmol), and acetone (5 mL) were combined in a procedure analogous to that for R<sub>f11</sub>CH<sub>2</sub>I. A similar workup (Et<sub>2</sub>O/20 mL and H<sub>2</sub>O/15 mL) gave R<sub>f15</sub>CH<sub>2</sub>I as a white solid (0.166 g, 0.182 mmol, 60%), mp 146.0-146.5 °C (capillary). Anal. Calcd for C<sub>16</sub>H<sub>2</sub>F<sub>31</sub>I: C 21.12, H 0.22, F 64.72. Found: C 21.42, H 0.23, F 64.44.

NMR ( $\delta$  in ppm): <sup>1</sup>H (acetone-*d*<sub>6</sub>, 500 MHz) 4.06 (t, <sup>3</sup>J<sub>HF</sub> = 18 Hz, 2H, CH<sub>2</sub>); <sup>19</sup>F{<sup>1</sup>H} (acetone-*d*<sub>6</sub>, 470 MHz) -81.6 (t, <sup>4</sup>J<sub>FF</sub> = 10 Hz [s1-s3], 3F, CF<sub>3</sub>), -107.0 (m, 2F, CF<sub>2</sub>), -122.1 (m, 22F, 11CF<sub>2</sub>), -123.2 (m, 2F, CF<sub>2</sub>), -126.7 (m, 2F, CF<sub>2</sub>); <sup>13</sup>C{<sup>1</sup>H} (C<sub>6</sub>F<sub>6</sub>, 125 MHz, partial) -7.0 (t, <sup>2</sup>J<sub>CF</sub> = 26 Hz, CH<sub>2</sub>). IR (powder film, cm<sup>-1</sup>): 2922 (w), 2853 (w), 1420 (w), 1377 (w), 1335 (w), 1204 (s), 1148 (s), 1049 (m), 870 (w).

**R<sub>f11</sub>CH<sub>2</sub>ICl<sub>2</sub>.** A round bottom flask was charged with R<sub>f11</sub>CH<sub>2</sub>I (1.01 g, 1.42 mmol), C<sub>6</sub>F<sub>6</sub> (1.4 mL), and CH<sub>3</sub>CN (14 mL) with stirring. Aqueous NaOCl (2.5% w/w, 21 mL) and then conc. HCl (10 mL) were slowly added. After 2 h, a pale yellow precipitate began to form. After 5 h, the mixture was filtered. The filter cake was washed with hexane (10 mL) and air dried (4-5 h)

to give  $R_{f11}CH_2ICl_2$  as pale yellow powder (0.90 g, 1.15 mmol, 81%), mp 122.1-125.4 °C (capillary). Anal. Calcd for  $C_{12}H_2F_{23}Cl_2I$ : C 18.46, H 0.26, F 55.96, Cl 9.08. Found C 16.76, H 1.16, F 50.15, Cl 7.98 [s4].

NMR ( $\delta$  in ppm, acetone- $d_6$ ):  $^1H$  (500 MHz) 5.44 (t,  $^3J_{HF} = 17$  Hz, 2H,  $CH_2$ );  $^{19}F\{^1H\}$  (470 MHz, partial) -106.7 (m, 2F,  $CF_2$ ). IR (powder film,  $cm^{-1}$ ): 3030 (w), 2970 (w), 1392 (w), 1373 (w), 1348 (w), 1315 (w), 1202 (s), 1148 (s), 1046 (m), 860 (m).

**$R_{f13}CH_2ICl_2$ .** A sample of  $R_{f13}CH_2I$  (0.147 g, 0.178 mmol),  $C_6F_6$  (5 mL),  $CH_3CN$  (3.5 mL), aqueous NaOCl (2.5% w/w, 3 mL), and conc. HCl (2 mL) were combined in a procedure analogous to that for  $R_{f11}CH_2ICl_2$ . An identical workup gave  $R_{f13}CH_2ICl_2$  as a pale yellow powder (0.052 g, 0.059 mmol, 33%), mp 164.1-166.2 °C (capillary).

NMR ( $\delta$  in ppm, acetone- $d_6$ ):  $^1H$  (500 MHz) 5.43 (t,  $^3J_{HF} = 17$  Hz, 2H,  $CH_2$ );  $^{19}F\{^1H\}$  (470 MHz, partial) -106.7 (m, 2F,  $CF_2$ ). IR (powder film,  $cm^{-1}$ ): 3038 (w), 2970 (w), 1391 (w), 1377 (w), 1356 (w), 1325 (w), 1202 (s), 1146 (s), 1057 (m), 810 (m).

**$R_{fO2}CH_2OTf$ .** A Schlenk flask was flame dried, allowed to cool, charged with  $R_{fO2}CH_2OH$  (4.66 g, 7.18 mmol) and anhydrous  $CF_3C_6H_5$  (40 mL) under a  $N_2$  flow, capped, and placed in an ice bath. Then pyridine (0.90 mL, 0.88 g, 11.1 mmol) and (after 30 min)  $Tf_2O$  (2.60 mL, 4.46 g, 15.8 mmol) were added dropwise by syringe with stirring. The ice bath was allowed to warm to room temperature. After 15 h,  $H_2O$  (50 mL) was added. After 30 min, the organic phase was separated and the organic phase was dried ( $Na_2SO_4$ ). The solvent was removed by rotary evaporation. The residue was dissolved in hexane/ethyl acetate (4:1 v/v). The solution was filtered through a silica pad (3  $\times$  5 cm). The solvent was removed by rotary evaporation to give  $R_{fO2}CH_2OTf$  as a colorless oil (5.18 g, 6.64 mmol, 92%). Anal. Calcd for  $C_{13}H_2F_{26}O_6S$ : C 20.01, H 0.26, F 63.31, S 4.11. Found C 20.28, H 0.17, F 63.36, S 3.95.

NMR ( $\delta$  in ppm, acetone- $d_6$ ):  $^1H$  (500 MHz) 5.57 (d,  $^3J_{HF} = 11$  Hz, 2H,  $CH_2$ );  $^{19}F\{^1H\}$  (470 MHz) -75.6 to -75.7 (m [s5], 3F,  $SO_2CF_3$ ), -80.4 to -83.2 (m, 18F), -130.5 (m, 2F), -135.9 to -136.5 (m, 1F), -145.3 to -145.9 (m, 2F);  $^{13}C\{^1H\}$  (125 MHz, partial) 69.8 (d,  $^2J_{CF} = 33$  Hz,  $CH_2$ ). IR (oil film,  $cm^{-1}$ ): 2990 (w), 1437 (m), 1306 (m), 1229 (s), 1200 (s), 1140 (s), 991

(s), 745 (m).

**R<sub>f</sub>O<sub>3</sub>CH<sub>2</sub>OTf.** A sample of R<sub>f</sub>O<sub>3</sub>CH<sub>2</sub>OH (4.89 g, 5.97 mmol), anhydrous CF<sub>3</sub>C<sub>6</sub>H<sub>5</sub> (30 mL), pyridine (0.75 mL, 0.73 g, 9.17 mmol), and Tf<sub>2</sub>O (2.20 mL, 3.71 g, 13.1 mmol) were combined in a procedure analogous to that for R<sub>f</sub>O<sub>2</sub>CH<sub>2</sub>OTf. An identical workup gave R<sub>f</sub>O<sub>3</sub>CH<sub>2</sub>OTf as a colorless oil (5.24 g, 5.54 mmol, 93%). Anal. Calcd for C<sub>16</sub>H<sub>2</sub>F<sub>32</sub>O<sub>7</sub>S: C 20.31, H 0.21, F 64.25, S 3.39. Found: C 20.90, H 0.15, F 65.82, S 2.46 [s4].

NMR ( $\delta$  in ppm, acetone-*d*<sub>6</sub>): <sup>1</sup>H (500 MHz) 5.57 (d, <sup>3</sup>J<sub>HF</sub> = 11 Hz, 2H, CH<sub>2</sub>); <sup>19</sup>F{<sup>1</sup>H} (470 MHz) -75.6 to -75.7 (m [s5], 3F, SO<sub>2</sub>CF<sub>3</sub>), -80.3 to -83.1 (m, 22F), -130.5 (m, 2F), -135.9 to -136.6 (m, 1F), -145.0 to -145.9 (m, 4F); <sup>13</sup>C{<sup>1</sup>H} (125 MHz, partial) 69.8 (d, <sup>2</sup>J<sub>CF</sub> = 32 Hz, CH<sub>2</sub>). IR (oil film, cm<sup>-1</sup>): 2990 (w), 1802 (w), 1439 (m), 1302 (m), 1306 (s), 1198 (s), 1126 (s), 982 (s), 746 (m).

**R<sub>f</sub>O<sub>4</sub>CH<sub>2</sub>OTf.** A sample of R<sub>f</sub>O<sub>4</sub>CH<sub>2</sub>OH (4.92 g, 5.02 mmol), anhydrous CF<sub>3</sub>C<sub>6</sub>H<sub>5</sub> (50 mL), pyridine (0.620 mL, 0.609 g, 7.67 mmol) and Tf<sub>2</sub>O (1.89 mL, 3.17 g, 11.2 mmol) were combined in a procedures analogous to that for R<sub>f</sub>O<sub>2</sub>CH<sub>2</sub>OTf. An identical workup gave R<sub>f</sub>O<sub>4</sub>-CH<sub>2</sub>OTf as a colorless oil (4.80 g, 4.32 mmol, 84%). Anal. Calcd for C<sub>19</sub>H<sub>2</sub>F<sub>38</sub>O<sub>8</sub>S: C 20.52, H 0.18, F 64.91, S 2.88. Found C 20.68, H 0.15, F 64.98, S 3.01.

NMR ( $\delta$  in ppm, acetone-*d*<sub>6</sub>): <sup>1</sup>H (500 MHz) 5.58 (d, <sup>3</sup>J<sub>HF</sub> = 12 Hz, 2H, CH<sub>2</sub>); <sup>19</sup>F{<sup>1</sup>H} (470 MHz) -75.6 to -75.7 (m [s5], 3F, SO<sub>2</sub>CF<sub>3</sub>), -80.3 to -83.1 (m, 28F), -130.4 (m, 2F), -136.3 (m, 1F), -145.0 to -145.8 (m, 4F); <sup>13</sup>C{<sup>1</sup>H} (125 MHz, partial) 69.8 (d, <sup>2</sup>J<sub>CF</sub> = 28 Hz, CH<sub>2</sub>). IR (oil film, cm<sup>-1</sup>): 2992 (w), 1802 (w), 1437 (m), 1306 (m), 1227 (s), 1198 (s), 1126 (s), 982 (s), 746 (m).

**R<sub>f</sub>O<sub>5</sub>CH<sub>2</sub>OTf.** A sample of R<sub>f</sub>O<sub>5</sub>CH<sub>2</sub>OH (1.90 g, 1.66 mmol), anhydrous CF<sub>3</sub>C<sub>6</sub>H<sub>5</sub> (10 mL), pyridine (0.21 mL, 0.21 g, 2.6 mmol) and Tf<sub>2</sub>O (0.62 mL, 1.03 g, 3.66 mmol) were combined in a procedure analogous to that for R<sub>f</sub>O<sub>2</sub>CH<sub>2</sub>OTf. As identical workup gave R<sub>f</sub>O<sub>5</sub>CH<sub>2</sub>OTf as a colorless oil (1.91 g, 1.49 mmol, 90%). Anal. Calcd for C<sub>22</sub>H<sub>2</sub>F<sub>44</sub>O<sub>9</sub>S: C 20.67, H 0.16, F 65.40, S 2.51. Found C 20.86, H 0.14, F 65.13, S 2.34.

NMR ( $\delta$  in ppm, acetone-*d*<sub>6</sub>): <sup>1</sup>H (500 MHz) 5.57 (d, <sup>3</sup>J<sub>HF</sub> = 12 Hz, 2H, CH<sub>2</sub>); <sup>19</sup>F{<sup>1</sup>H}

(470 MHz)  $-75.6$  to  $-75.7$  (m [s5], 3F,  $\text{SO}_2\text{CF}_3$ ),  $-80.3$  to  $-83.1$  (m, 32F),  $-130.4$  (m, 2F),  $-136.0$  to  $-136.5$  (m, 1F),  $-145.0$  to  $-145.9$  (m, 4F);  $^{13}\text{C}\{^1\text{H}\}$  (125 MHz, partial)  $69.8$  (d,  $^2J_{\text{CF}} = 30$  Hz,  $\text{CH}_2$ ). IR (oil film,  $\text{cm}^{-1}$ ): 2916 (w), 1439 (m), 1304 (m), 1227 (s), 1200 (s), 1125 (s), 982 (s), 745 (m).

**$\text{R}_{\text{fO}2}\text{CH}_2\text{I}$ .** A round bottom flask was charged with  $\text{R}_{\text{fO}2}\text{CH}_2\text{OTf}$  (4.56 g, 5.84 mmol), NaI (14.02 g, 93.52 mmol), and acetone (40 mL), and fitted with a condenser. The flask was placed in a  $70^\circ\text{C}$  oil bath and the mixture was stirred. After 1 h, the bath was removed. After 9 h, the solvent was removed by rotary evaporation. Then  $\text{Et}_2\text{O}$  (70 mL) was added with stirring. After 15 min, the mixture was filtered. The filtrate was washed with  $\text{H}_2\text{O}$  (50 mL) and saturated aqueous  $\text{Na}_2\text{S}_2\text{O}_3$  until it became colorless, and dried ( $\text{Na}_2\text{SO}_4$ ). The solvent was removed by rotary evaporation and the residue was dissolved in pentane/ethyl acetate (20:1 v/v). The solution was filtered through a silica pad ( $3 \times 8$  cm). The solvent was removed by rotary evaporation to give  $\text{R}_{\text{fO}2}\text{CH}_2\text{I}$  as a colorless liquid (3.66 g, 4.73 mmol, 81%).

NMR ( $\delta$  in ppm, acetone- $d_6$ ):  $^1\text{H}$  (500 MHz) 3.93-4.17 (m, 2H,  $\text{CH}_2$ );  $^{13}\text{C}\{^1\text{H}\}$  (125 MHz, partial)  $-4.2$  (m,  $\text{CH}_2$ ).

**$\text{R}_{\text{fO}4}\text{CH}_2\text{I}$ .** A round bottom flask was charged with  $\text{R}_{\text{fO}4}\text{CH}_2\text{OTf}$  (3.00 g, 2.69 mmol), NaI (6.20 g, 41.4 mmol), and acetone (10 mL), and fitted with a condenser. The flask was placed in a  $75^\circ\text{C}$  oil bath and the mixture was stirred. After 1 h, the bath was removed and the mixture was allowed to cool. The solvent was removed by rotary evaporation. Then  $\text{Et}_2\text{O}$  (20 mL) and  $\text{H}_2\text{O}$  (15 mL) were added with stirring. After 5 min, the dark brown organic phase was separated, washed with saturated aqueous  $\text{Na}_2\text{S}_2\text{O}_3$  until it became colorless, and dried ( $\text{Na}_2\text{SO}_4$ ). The solvent was removed by rotary evaporation and the residue was dissolved in hexanes/ethyl acetate (20:1 v/v). The solution was filtered through a silica pad ( $3 \times 5$  cm). The solvent was removed by rotary evaporation to give  $\text{R}_{\text{fO}4}\text{CH}_2\text{I}$  as a colorless liquid (2.67 g, 2.45 mmol, 91%). Anal. Calcd for  $\text{C}_{18}\text{H}_2\text{F}_{35}\text{IO}_5$ : C 19.83, H 0.18, F 61.00, I 11.64. Found C 20.10, H 0.18, F 61.25, I 11.36.

NMR ( $\delta$  in ppm, acetone- $d_6$ ):  $^1\text{H}$  (500 MHz) 4.00-4.15 (m, 2H,  $\text{CH}_2$ );  $^{19}\text{F}\{^1\text{H}\}$  (470 MHz)  $-78.7$  to  $-85.1$  (m, 28F),  $-122.9$  to  $-123.5$  (m, 1F),  $-130.4$  (s, 2F),  $-144.8$  to  $-145.8$  (m,

4F);  $^{13}\text{C}\{^1\text{H}\}$  (125 MHz, partial)  $-4.2$  (apparent t,  $^2J_{\text{CF}} = 22$  Hz,  $\text{CH}_2$  [s5,s6]). IR (oil film,  $\text{cm}^{-1}$ ): 2976 (w), 1802 (w), 1304 (s), 1229 (s), 1200 (s), 1178 (s), 1142 (s), 1123 (s), 982 (s), 745 (m).

**$\text{R}_{\text{fO}5}\text{CH}_2\text{I}$ .** Acetone (10 mL),  $\text{R}_{\text{fO}5}\text{CH}_2\text{OTf}$  (1.72 g, 1.35 mmol), and NaI (3.22 g, 21.5 mmol) were combined in a procedure analogous to that for  $\text{R}_{\text{fO}2}\text{CH}_2\text{I}$ . A similar reaction and workup ( $3 \times 5$  cm silica pad) gave  $\text{R}_{\text{fO}5}\text{CH}_2\text{I}$  as a colorless liquid (1.44 g, 1.13 mmol, 84%).

NMR ( $\delta$  in ppm, 4:1 v/v acetone- $d_6$ /C $_6$ F $_6$ ):  $^1\text{H}$  (500 MHz) 3.84-4.19 (m, 2H,  $\text{CH}_2$ );  $^{13}\text{C}\{^1\text{H}\}$  (125 MHz, partial)  $-4.3$  (m,  $\text{CH}_2$ ).

**1,3- $\text{R}_{\text{f}6}\text{C}_6\text{H}_4\text{I}$ .** A Schlenk tube was charged with copper (1.26 g, 20.0 mmol) and DMSO (30 mL) and placed in a 105 °C oil bath. The mixture was sparged with  $\text{N}_2$  with stirring (30 min), and 1,3-diiodobenzene (6.60 g, 20.0 mmol) was added. After a second sparge,  $\text{R}_{\text{f}6}\text{I}$  (4.48 g, 10.0 mmol) was added in portions over 30 min under a  $\text{N}_2$  flow with stirring. The tube was sealed and placed in a 110 °C oil bath. After 4 d, the mixture was cooled to room temperature and poured into  $\text{H}_2\text{O}$  (100 mL). Then  $\text{Et}_2\text{O}$  (100 mL) was added with stirring. After 1 h, the aqueous phase was separated and extracted with  $\text{Et}_2\text{O}$  ( $5 \times 50$  mL). The combined organic phases were dried ( $\text{Na}_2\text{SO}_4$ ) and the solvent was removed by rotary evaporation. The residue was dissolved in  $\text{CH}_3\text{CN}$  (10 mL). The sample was extracted with perfluorohexane ( $5 \times 5$  mL). The fluoruous layers were combined, concentrated to 2 mL, and extracted with acetone ( $5 \times 3$  mL). The solvent was removed from the extracts by oil pump vacuum to give 1,3- $\text{R}_{\text{f}6}\text{C}_6\text{H}_4\text{I}$  as a colorless oil (3.16 g, 6.05 mmol, 60% based upon  $\text{R}_{\text{f}6}\text{I}$ ). Anal. Calcd for  $\text{C}_{12}\text{H}_4\text{F}_{13}\text{I}$ : C 27.61, H 0.77, F 47.31. Found C 28.09, H 0.67, F 48.59 [s4]. The solvent was removed from the concentrated perfluorohexane extract by oil pump vacuum to give 1,3-( $\text{R}_{\text{f}6}$ ) $_2\text{C}_6\text{H}_4$  as a light yellow oil (1.07 g, 1.51 mmol, 15%) [s7]. The  $^1\text{H}$  NMR spectrum matched those in the literature [s7,s8].

NMR ( $\delta$  in ppm,  $\text{CD}_2\text{Cl}_2$ ):  $^1\text{H}$  (500 MHz) 8.01 (s, 1H), 7.96 (d,  $^3J_{\text{HH}} = 8$  Hz, 1H), 7.61 (d,  $^3J_{\text{HH}} = 8$  Hz, 1H), 7.26 (t,  $^3J_{\text{HH}} = 8$  Hz, 1H);  $^{19}\text{F}\{^1\text{H}\}$  (470 MHz)  $-82.0$  (t,  $^4J_{\text{FF}} = 9$  Hz [s1-s3], 3F,  $\text{CF}_3$ ),  $-111.7$  (t,  $^4J_{\text{FF}} = 15$  Hz [s1-s3], 2F,  $\text{CF}_2$ ),  $-122.1$  (m, 2F,  $\text{CF}_2$ ),  $-122.3$  (m, 2F,  $\text{CF}_2$ ),  $-123.5$  (m, 2F,  $\text{CF}_2$ ),  $-127.0$  (m, 2F,  $\text{CF}_2$ );  $^{13}\text{C}\{^1\text{H}, ^{19}\text{F}\}$  (125 MHz) 141.9, 136.4, 130.8,

126.8, 118.0 ( $5 \times s$ , C<sub>6</sub>H<sub>4</sub>), 116.1, 115.8, 112.0, 111.5, 111.1, 109.3 ( $5 \times s$ , 5CF<sub>2</sub>/CF<sub>3</sub>), 94.4 (s, Cl).

**1,3-R<sub>f6</sub>C<sub>6</sub>H<sub>4</sub>ICl<sub>2</sub>.** A round bottom flask was charged 1,3-R<sub>f6</sub>C<sub>6</sub>H<sub>4</sub>I (0.523 g, 1.00 mmol), C<sub>6</sub>F<sub>6</sub> (1 mL), and CH<sub>3</sub>CN (10 mL) with stirring. Aqueous NaOCl (2.5% w/w, 10 mL) followed by conc. HCl (10 mL) were slowly added. After 30 min, a pale yellow precipitate began to form. After 3 h, the mixture was filtered. The filter cake was washed with H<sub>2</sub>O (5 mL) and hexane (10 mL) and air dried (2 d) to give 1,3-R<sub>f6</sub>C<sub>6</sub>H<sub>4</sub>ICl<sub>2</sub> as a pale yellow powder (0.477 g, 0.804 mmol, 80%). Anal. Calcd for C<sub>12</sub>H<sub>4</sub>F<sub>13</sub>Cl<sub>2</sub>I: C 24.31, H 0.68, F 41.65. Found C 23.89, H 0.38, F 49.81 [s4].

NMR ( $\delta$  in ppm, CDCl<sub>3</sub>/C<sub>6</sub>F<sub>6</sub>): <sup>1</sup>H (500 MHz) 8.54-8.52 (m, 2H), 7.94 (d, <sup>3</sup>J<sub>HH</sub> = 8 Hz, 1H), 7.79 (t, <sup>3</sup>J<sub>HH</sub> = 8 Hz, 1H); <sup>19</sup>F{<sup>1</sup>H} (470 MHz) -82.3 (t, <sup>4</sup>J<sub>FF</sub> = 9 Hz [s1-s3], 3F, CF<sub>3</sub>), -112.0 (t, <sup>4</sup>J<sub>FF</sub> = 15 Hz [s1-s3], 2F, CF<sub>2</sub>), -124.4 (m, 4F, 2CF<sub>2</sub>), -123.7 (m, 2F, CF<sub>2</sub>), -127.3 (m, 2F, CF<sub>2</sub>).

**1,4-R<sub>f6</sub>C<sub>6</sub>H<sub>4</sub>I.** Copper (1.26 g, 20.0 mmol), DMSO (30 mL), 1,4-diiodobenzene (6.60 g, 20.0 mmol), and R<sub>f6</sub>I (4.48 g, 10.0 mmol) were combined in a procedure analogous to that for 1,3-R<sub>f6</sub>C<sub>6</sub>H<sub>4</sub>I. An identical workup gave 1,4-R<sub>f6</sub>C<sub>6</sub>H<sub>4</sub>I as a colorless oil (2.58 g, 4.98 mmol, 50% based upon R<sub>f6</sub>I). Anal. Calcd for C<sub>12</sub>H<sub>4</sub>F<sub>13</sub>I: C 27.61, H 0.77, F 47.31. Found C 27.88, H 0.65, F 47.05. The solvent was removed from the concentrated perfluorohexane extract by oil pump vacuum to give 1,4-(R<sub>f6</sub>)<sub>2</sub>C<sub>6</sub>H<sub>4</sub> as a light yellow oil (1.42 g, 1.99 mmol, 20%). Anal. Calcd for C<sub>18</sub>H<sub>4</sub>F<sub>26</sub>: C 30.27, H 0.56, F 69.16. Found C 30.07, H 0.42, F 68.90.

NMR ( $\delta$  in ppm, CD<sub>2</sub>Cl<sub>2</sub>): <sup>1</sup>H (500 MHz) 7.90 (d, <sup>3</sup>J<sub>HH</sub> = 9 Hz, 2H), 7.33 (d, <sup>3</sup>J<sub>HH</sub> = 9 Hz, 2H); <sup>19</sup>F{<sup>1</sup>H} (470 MHz) -81.8 (t, <sup>4</sup>J<sub>FF</sub> = 10 Hz [s1-s3], 3F, CF<sub>3</sub>), -111.8 (t, <sup>4</sup>J<sub>FF</sub> = 15 Hz [s1-s3], 2F, CF<sub>2</sub>), -122.0 (m, 2F, CF<sub>2</sub>), -122.5 (m, 2F, CF<sub>2</sub>), -123.4 (m, 2F, CF<sub>2</sub>), -126.9 (m, 2F, CF<sub>2</sub>); <sup>13</sup>C{<sup>1</sup>H,<sup>19</sup>F} (125 MHz) 137.4, 127.8, 127.6 ( $3 \times s$ , C<sub>6</sub>H<sub>4</sub>), 116.6, 115.2, 110.6, 110.1, 109.7, 107.9 ( $5 \times s$ , 5CF<sub>2</sub>/CF<sub>3</sub>), 98.4 (s, Cl).

**1,4-R<sub>f6</sub>C<sub>6</sub>H<sub>4</sub>ICl<sub>2</sub>.** The iodide 1,4-R<sub>f6</sub>C<sub>6</sub>H<sub>4</sub>I (0.527 g, 1.01 mmol), C<sub>6</sub>F<sub>6</sub> (1 mL), CH<sub>3</sub>CN (10 mL), NaOCl (2.5% w/w, 10 mL), and HCl (10 mL) were combined in a procedure analogous

to that for 1,3- $R_{f6}C_6H_4ICl_2$ . An identical workup gave 1,4- $R_{f6}C_6H_4ICl_2$  as a pale yellow powder (0.518 g, 0.873 mmol, 86%).

NMR ( $\delta$  in ppm,  $CDCl_3/C_6F_6$ ):  $^1H$  (500 MHz) 8.46 (d,  $^3J_{HH} = 8$  Hz, 2H), 7.81 (d,  $^3J_{HH} = 8$  Hz, 2H);  $^{19}F\{^1H\}$  (470 MHz) -82.3 (t,  $^4J_{FF} = 10$  Hz [s1-s3], 3F,  $CF_3$ ), -112.3 (t,  $^4J_{FF} = 14$  Hz [s1-s3], 2F,  $CF_2$ ), -122.3 (m, 4F,  $2CF_2$ ), -123.7 (m, 2F,  $CF_2$ ), -127.2 (m, 2F,  $CF_2$ ).

**1,3- $R_{f10}C_6H_4I$ .** Copper (1.26 g, 20.0 mmol), DMSO (30 mL), 1,3-diiodobenzene (6.40 g, 20.0 mmol), and  $R_{f10}I$  (6.48 g, 10.0 mmol) were combined in a procedure similar to that for 1,3- $R_{f6}C_6H_4I$  (130 °C oil bath). The workup was identical until the organic phases were dried ( $Na_2SO_4$ ). The solvent was removed by rotary evaporation, and the residue was dissolved in MeOH (40 mL) in a round bottom flask, which was capped. After 4 d, the precipitate was collected by filtration, washed with cold MeOH (1 mL), and dried by oil pump vacuum to give 1,3- $R_{f10}C_6H_4I$  as a white solid (3.62 g, 5.00 mmol, 50%). Anal. Calcd for  $C_{16}H_4F_{21}I$ : C 26.61, H 0.56, F 55.25. Found C 26.62, H 0.39, F 54.98.

NMR ( $\delta$  in ppm,  $CDCl_3$ ):  $^1H$  (500 MHz) 7.93-7.92 (m, 2H), 7.56 (d,  $^3J_{HH} = 8$  Hz, 1H), 7.25 (t,  $^3J_{HH} = 8$  Hz, 1H);  $^{19}F\{^1H\}$  (470 MHz) -80.7 (t,  $^4J_{FF} = 10$  Hz [s1-s3], 3F,  $CF_3$ ), -110.9 (t,  $^4J_{FF} = 15$  Hz [s1-s3], 2F,  $CF_2$ ), -121.2 (m, 2F,  $CF_2$ ), -121.6 to -121.9 (m, 10F,  $5CF_2$ ), -122.7 (m, 2F,  $CF_2$ ), -126.1 (m, 2F,  $CF_2$ );  $^{13}C\{^1H, ^{19}F\}$  (125 MHz, partial) 141.1, 135.6, 130.2, 128.5, 126.0 ( $5 \times s$ ,  $C_6H_4$ ), 93.7 (s, Cl).

**1,3- $R_{f10}C_6H_4ICl_2$ .** The iodide 1,3- $R_{f10}C_6H_4I$  (0.739 g, 1.02 mmol),  $C_6F_6$  (1 mL),  $CH_3CN$  (10 mL),  $NaOCl$  (2.5% w/w, 10 mL), and conc.  $HCl$  (10 mL) were combined in a procedure analogous to that for 1,3- $R_{f6}C_6H_4ICl_2$ . An identical workup gave 1,3- $R_{f10}C_6H_4ICl_2$  as a pale yellow solid (0.724 g, 0.912 mmol, 89%). Anal. Calcd for  $C_{16}H_4F_{21}ICl_2$ : C 24.23, H 0.51, F 50.31. Found C 24.13, H 0.34, F 50.06. Further characterization or analysis was complicated by the extremely low solubility of this compound in common organic and fluorous solvents.

**1,3,5- $(R_{f6})_2C_6H_3I$ .** A round bottom flask was charged with 1,3- $(R_{f6})_2C_6H_4$  (0.555 g, 0.775 mmol) [s7], fuming  $H_2SO_4$  (0.7 mL), and trifluoroacetic acid (1.7 mL) with stirring. Then NIS (0.112 g, 0.500 mmol) was added. Identical quantities of NIS were added after 2 h and 4 h.

After 48 h, ice (30 g) was slowly added, followed by CH<sub>2</sub>Cl<sub>2</sub> (100 mL). The biphasic mixture was stirred, and NaOH was added until the pH of the aqueous phase reached 7. The aqueous phase was separated and extracted with CH<sub>2</sub>Cl<sub>2</sub> (3 × 50 mL). The combined organic phases were washed with 0.1 M aqueous Na<sub>2</sub>S<sub>2</sub>O<sub>3</sub> and dried (MgSO<sub>4</sub>). The solvent was removed by rotary evaporation to give 1,3,5-(R<sub>f6</sub>)<sub>2</sub>C<sub>6</sub>H<sub>3</sub>I as a white solid (0.501 g, 0.596 mmol, 77%). Anal. Calcd for C<sub>18</sub>H<sub>3</sub>F<sub>26</sub>I: C 25.74, H 0.36, F 58.80. Found C 25.66, H 0.24, F 58.53.

NMR ( $\delta$  in ppm): <sup>1</sup>H (500 MHz, CDCl<sub>3</sub> or CD<sub>2</sub>Cl<sub>2</sub>/C<sub>6</sub>F<sub>6</sub>) 8.15 (s, 2H), 7.77 (s, 1H); <sup>19</sup>F{<sup>1</sup>H} (470 MHz, CD<sub>2</sub>Cl<sub>2</sub>/C<sub>6</sub>F<sub>6</sub>) -82.7 (t, <sup>4</sup>J<sub>FF</sub> = 10.5 Hz [s1-s3], 3F, CF<sub>3</sub>), -113.2 (t, <sup>4</sup>J<sub>FF</sub> = 14.5 Hz [s1-s3], 2F, CF<sub>2</sub>), -123.4 (m, 2F, CF<sub>2</sub>), -123.6 (m, 2F, CF<sub>2</sub>), -124.8 (m, 2F, CF<sub>2</sub>), -128.1 (m, 2F, CF<sub>2</sub>); <sup>13</sup>C{<sup>1</sup>H} (125 MHz, CD<sub>2</sub>Cl<sub>2</sub>/C<sub>6</sub>F<sub>6</sub>, partial) 132.2 (t, <sup>2</sup>J<sub>CF</sub> = 25.1 Hz, CHCCF<sub>2</sub>), 130.1 (s, CCI), 125.6 (t, <sup>3</sup>J<sub>CF</sub> = 7.0 Hz, CF<sub>2</sub>CCHCCF<sub>2</sub>), 94.2 (s, CI).

**1,3,5-(R<sub>f6</sub>)<sub>2</sub>C<sub>6</sub>H<sub>3</sub>ICl<sub>2</sub>.** A Schlenk tube was charged with 1,3,5-(R<sub>f6</sub>)<sub>2</sub>C<sub>6</sub>H<sub>3</sub>I (1.69 g, 2.00 mmol) and CF<sub>3</sub>C<sub>6</sub>H<sub>5</sub> (30 mL) and cooled to -30 °C. The solution was saturated with Cl<sub>2</sub> gas. After 24 h, two aliquots (1 mL each) were removed and analyzed by <sup>1</sup>H NMR. The spectra showed 77:23 ArICl<sub>2</sub>/ArI mixtures. The solvent was removed from one aliquot by rotary evaporation to give a 75:25 ArICl<sub>2</sub>/ArI mixture as a pale white solid (Figure 1-b). This solid was dissolved in CF<sub>3</sub>C<sub>6</sub>H<sub>5</sub> (2 mL) and the sample was kept at -35 °C. After 7 d, the solvent was removed by rotary evaporation to give a 65:35 ArICl<sub>2</sub>/ArI mixture as a pale white solid (Figure 1-d). The solvent was removed from the second aliquot at -40 °C by oil pump vacuum to give a 35:65 ArICl<sub>2</sub>/ArI mixture as a pale white solid (Figure 1-c).

NMR ( $\delta$  in ppm, CDCl<sub>3</sub>): <sup>1</sup>H (500 MHz) 8.69 (s, 2H), 7.98 (s, 1H).

**1,2,4-(R<sub>f8</sub>CH<sub>2</sub>CH<sub>2</sub>)<sub>2</sub>C<sub>6</sub>H<sub>3</sub>I** [s9]. A Schlenk tube was charged with 1,3-(R<sub>f8</sub>CH<sub>2</sub>CH<sub>2</sub>)<sub>2</sub>-C<sub>6</sub>H<sub>4</sub> (0.600 g, 0.618 mmol) [s10], I<sub>2</sub> (0.627 g, 2.47 mmol), H<sub>5</sub>IO<sub>6</sub> (0.283 g, 1.24 mmol), CH<sub>3</sub>-CO<sub>2</sub>H (10 mL), H<sub>2</sub>SO<sub>4</sub> (0.30 mL) and H<sub>2</sub>O (2.0 mL). The tube was placed in a 100 °C oil bath and the mixture was stirred overnight. Another charge of H<sub>5</sub>IO<sub>6</sub> (0.283 g, 1.24 mmol) was added. After 12 h, the mixture was allowed to cool to room temperature, and CH<sub>2</sub>Cl<sub>2</sub> (15 mL) was added. After 5 min, the purple organic phase was separated. A saturated aqueous Na<sub>2</sub>S<sub>2</sub>O<sub>3</sub> solu-

tion was added dropwise with vigorous stirring until the color was discharged. The aqueous phase was extracted with CH<sub>2</sub>Cl<sub>2</sub> (2 × 15 mL). The combined organic phases were dried (MgSO<sub>4</sub>). The solvent was removed by rotary evaporation to give 1,2,4-(R<sub>18</sub>CH<sub>2</sub>CH<sub>2</sub>)<sub>2</sub>C<sub>6</sub>H<sub>3</sub>I as a white solid (0.630 g, 0.574 mmol, 93%), mp 37-39 °C (capillary). Anal. Calcd for C<sub>26</sub>H<sub>11</sub>F<sub>34</sub>I: C 28.49, H 1.01, F 58.92. Found: C 28.47, H 1.13, F 58.64.

NMR ( $\delta$  in ppm, CDCl<sub>3</sub>): <sup>1</sup>H (400 MHz) 7.78 (d, <sup>3</sup>J<sub>HH</sub> = 8 Hz, 1H, CH<sub>Ar</sub>), 7.12 (s, 1H, CH<sub>Ar</sub>), 6.82 (d, <sup>3</sup>J<sub>HH</sub> = 8 Hz, 1H, CH<sub>Ar</sub>), 2.85-3.04 (m, 4H, 2CH<sub>2</sub>CF<sub>2</sub>), 2.35-2.38 (m, 4H, 2CH<sub>2</sub>CH<sub>2</sub>CF<sub>2</sub>); <sup>13</sup>C{<sup>1</sup>H} (100 MHz) 140.29, 140.24, 140.17, 129.7, 128.7 (5 × s, C<sub>6</sub>H<sub>3</sub>), 117.9, 116.2 (2 × t, <sup>2</sup>J<sub>CF</sub> = 22 Hz, 2CF<sub>2</sub>CF<sub>3</sub> [s11]), 112.8, 111.1, 110.8, 109.1, 108.3 (5 overlapping m, 7CF<sub>2</sub>), 97.5 (s, Cl), 32.7, 31.6 (2 × t, <sup>2</sup>J<sub>CF</sub> = 22 Hz, 2CH<sub>2</sub>CF<sub>2</sub>), 26.00, 25.99 (2 × s, 2CH<sub>2</sub>CH<sub>2</sub>CF<sub>2</sub>); <sup>19</sup>F{<sup>1</sup>H} (376 MHz) -80.9 (t, <sup>4</sup>J<sub>FF</sub> = 10 Hz [s1-s3], 6F, 2CF<sub>3</sub>), -114.2 (m, 4F, 2CF<sub>2</sub>), -121.5 (m, 8F, 4CF<sub>2</sub>), -21.7 (m, 4F, 2CF<sub>2</sub>), -122.5 (m, 4F, 2CF<sub>2</sub>), -123.3 (m, 4F, 2CF<sub>2</sub>), -125.9 (m, 4F, 2CF<sub>2</sub>).

**1,2,4-(R<sub>18</sub>CH<sub>2</sub>CH<sub>2</sub>)<sub>2</sub>C<sub>6</sub>H<sub>3</sub>ICl<sub>2</sub> [s9].** A round bottom flask was charged with 1,2,4-(R<sub>18</sub>-CH<sub>2</sub>CH<sub>2</sub>)<sub>2</sub>C<sub>6</sub>H<sub>3</sub>I (0.42 g, 0.38 mmol) and perfluoroheptane (5 mL). The suspension was mildly heated to give a colorless solution, and H<sub>2</sub>O (5 mL) and aqueous NaOCl (2.5% w/w, 2 mL) were added with stirring to give a biphasic mixture. Then conc. HCl (1 mL) was slowly added with vigorous stirring. After 5 min, the white precipitate was isolated by filtration (glass frit) and dried by means of an air flow (0.5 h) to give a monohydrate of 1,2,4-(R<sub>18</sub>CH<sub>2</sub>CH<sub>2</sub>)<sub>2</sub>C<sub>6</sub>H<sub>3</sub>ICl<sub>2</sub> as a white powder (0.400 g, 0.338 mmol, 89%), mp 53-54 °C (capillary). Anal. Calcd for C<sub>26</sub>H<sub>11</sub>F<sub>34</sub>·ICl<sub>2</sub>·H<sub>2</sub>O: C 26.35, H 1.11. Found: C 26.27, H 1.13. The yield of a reaction carried out in C<sub>6</sub>F<sub>6</sub> (5 mL) was similar.

NMR ( $\delta$  in ppm, CDCl<sub>3</sub>): <sup>1</sup>H (400 MHz) 8.23 (d, <sup>3</sup>J<sub>HH</sub> = 8 Hz, 1H, CH<sub>Ar</sub>), 7.36 (s, 1H, CH<sub>Ar</sub>), 7.20 (d, <sup>3</sup>J<sub>HH</sub> = 8 Hz, 1H, CH<sub>Ar</sub>), 3.41, 3.04 (2 × m, 2 × 2H, 2CH<sub>2</sub>CF<sub>2</sub>), 2.65, 2.43 (2 × m, 2 × 2H, 2CH<sub>2</sub>CH<sub>2</sub>CF<sub>2</sub>); <sup>13</sup>C{<sup>1</sup>H} (100 MHz, partial) 145.8, 139.9, 137.6, 130.9, 130.6, 130.4 (6 × s, C<sub>6</sub>H<sub>3</sub>), 32.4, 32.1 (2 × t, <sup>2</sup>J<sub>CF</sub> = 22 Hz, 2CH<sub>2</sub>CF<sub>2</sub>), 30.6, 26.4 (2 × s, 2CH<sub>2</sub>CH<sub>2</sub>CF<sub>2</sub>); <sup>19</sup>F{<sup>1</sup>H} (376 MHz) -80.7 (t, <sup>4</sup>J<sub>FF</sub> = 8 Hz [s1-s3], 6F, 2CF<sub>3</sub>), -114.3 (m, 4F, 2CF<sub>2</sub>), -121.6 (m,

8F, 4CF<sub>2</sub>), -21.8 (m, 4F, 2CF<sub>2</sub>), -122.7 (m, 4F, 2CF<sub>2</sub>), -123.3 (m, 4F, 2CF<sub>2</sub>), -126.1 (m, 4F, 2CF<sub>2</sub>).

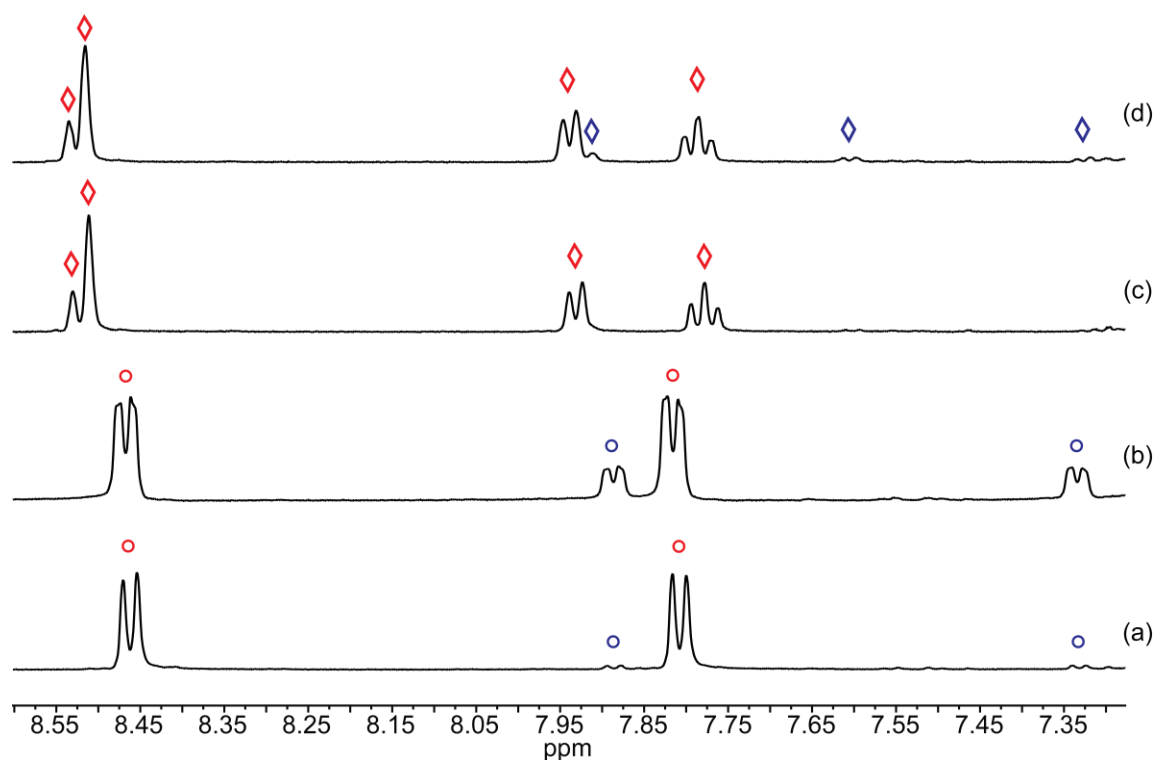

**Figure S1.** Partial <sup>1</sup>H NMR spectra (sp<sup>2</sup> CH, 500 MHz, 1:1 v/v CDCl<sub>3</sub>/C<sub>6</sub>F<sub>6</sub>, Ph<sub>2</sub>SiMe<sub>2</sub> internal standard) illustrating the stabilities of 1,4- and 1,3-R<sub>f6</sub>C<sub>6</sub>H<sub>4</sub>ICl<sub>2</sub>: (a) 1,4-R<sub>f6</sub>C<sub>6</sub>H<sub>4</sub>ICl<sub>2</sub> shortly after dissolution (95:05 ArICl<sub>2</sub>/ArI; red ° = ArICl<sub>2</sub>, blue ° = ArI); (b) the preceding sample after 60 h; (c) 1,3-R<sub>f6</sub>C<sub>6</sub>H<sub>4</sub>ICl<sub>2</sub> shortly after dissolution; (d) the preceding sample after 60 h (93:07 ArICl<sub>2</sub>/ArI; red ◇ = ArICl<sub>2</sub>, blue ◇ = ArI).

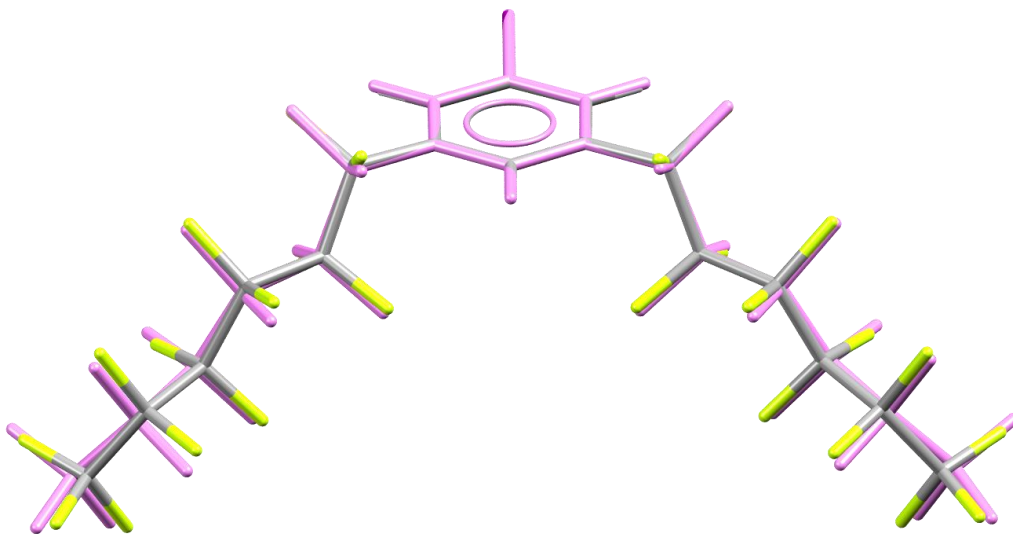

**Figure S2.** Overlay of the crystal structure of 1,3,5-(R<sub>f6</sub>)<sub>2</sub>C<sub>6</sub>H<sub>3</sub>I (Figure 2) with the calculated geometry (DFT, magenta).

**Table S1.** Calculated gas phase free energies of chlorination for selected alkyl and aryl iodides.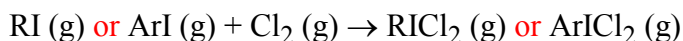

| Compound                                                                                                                                                 | $\Delta G$ , kcal/mol |
|----------------------------------------------------------------------------------------------------------------------------------------------------------|-----------------------|
| R <sub>f1</sub> I                                                                                                                                        | 5.43                  |
| R <sub>f2</sub> I                                                                                                                                        | 5.75                  |
| R <sub>f3</sub> I                                                                                                                                        | 5.57                  |
| R <sub>f4</sub> I                                                                                                                                        | 5.36                  |
| R <sub>f5</sub> I                                                                                                                                        | 5.31                  |
| R <sub>f6</sub> I                                                                                                                                        | 5.30                  |
| R <sub>f7</sub> I                                                                                                                                        | 5.29                  |
| R <sub>f8</sub> I                                                                                                                                        | 5.28                  |
| R <sub>f1</sub> CH <sub>2</sub> I                                                                                                                        | -0.72                 |
| R <sub>f2</sub> CH <sub>2</sub> I                                                                                                                        | -0.55                 |
| R <sub>f3</sub> CH <sub>2</sub> I                                                                                                                        | -0.51                 |
| R <sub>f4</sub> CH <sub>2</sub> I                                                                                                                        | -0.53                 |
| R <sub>f5</sub> CH <sub>2</sub> I                                                                                                                        | -0.55                 |
| R <sub>f6</sub> CH <sub>2</sub> I                                                                                                                        | -0.54                 |
| R <sub>f7</sub> CH <sub>2</sub> I                                                                                                                        | -0.56                 |
| R <sub>f8</sub> CH <sub>2</sub> I                                                                                                                        | -0.59                 |
| CF <sub>3</sub> CF <sub>2</sub> CF <sub>2</sub> O(CF(CF <sub>3</sub> )CF <sub>2</sub> O) <sub>1</sub> CF(CF <sub>3</sub> )CH <sub>2</sub> I <sup>a</sup> | -0.65                 |
| CF <sub>3</sub> CF <sub>2</sub> CF <sub>2</sub> O(CF(CF <sub>3</sub> )CF <sub>2</sub> O) <sub>2</sub> CF(CF <sub>3</sub> )CH <sub>2</sub> I <sup>a</sup> | -0.71                 |
| CF <sub>3</sub> CF <sub>2</sub> CF <sub>2</sub> O(CF(CF <sub>3</sub> )CF <sub>2</sub> O) <sub>3</sub> CF(CF <sub>3</sub> )CH <sub>2</sub> I <sup>a</sup> | -0.84                 |
| 1,2,3,5-CH <sub>3</sub> (NO <sub>2</sub> ) <sub>2</sub> C <sub>6</sub> H <sub>2</sub> I <sup>b</sup> ( <b>I-Me</b> )                                     | 0.15                  |
| 1,3,5-(NO <sub>2</sub> ) <sub>2</sub> C <sub>6</sub> H <sub>3</sub> I ( <b>I</b> )                                                                       | 0.88                  |
| C <sub>6</sub> H <sub>5</sub> I                                                                                                                          | -3.86                 |
| 1,3-R <sub>f6</sub> C <sub>6</sub> H <sub>4</sub> I                                                                                                      | -1.82                 |
| 1,4-R <sub>f6</sub> C <sub>6</sub> H <sub>4</sub> I                                                                                                      | -1.92                 |
| 1,3,5-(R <sub>f6</sub> ) <sub>2</sub> C <sub>6</sub> H <sub>3</sub> I                                                                                    | -0.68                 |
| 1,2,4-(R <sub>f6</sub> CH <sub>2</sub> CH <sub>2</sub> ) <sub>2</sub> C <sub>6</sub> H <sub>3</sub> I <sup>b</sup>                                       | -2.88                 |
| 1,2,4-(R <sub>f6</sub> CH <sub>2</sub> CH <sub>2</sub> CH <sub>2</sub> ) <sub>2</sub> C <sub>6</sub> H <sub>3</sub> I <sup>b</sup> ( <b>VII</b> )        | -3.40                 |
| 1,3,4-(R <sub>f6</sub> CH <sub>2</sub> CH <sub>2</sub> CH <sub>2</sub> ) <sub>2</sub> C <sub>6</sub> H <sub>3</sub> I <sup>b</sup> ( <b>VIII</b> )       | -3.75                 |
| 1,2,4,6-(R <sub>f6</sub> CH <sub>2</sub> CH <sub>2</sub> CH <sub>2</sub> ) <sub>3</sub> C <sub>6</sub> H <sub>3</sub> I <sup>b</sup> ( <b>IX</b> )       | -4.15                 |
| (R <sub>f6</sub> ) <sub>3</sub> CCH <sub>2</sub> I ( <b>X</b> with $n = 6$ )                                                                             | 3.36                  |
| 1,4-(R <sub>f6</sub> ) <sub>3</sub> CC <sub>6</sub> H <sub>4</sub> I ( <b>XII</b> with $n = 6$ )                                                         | -1.93                 |
| 1,4-(R <sub>f8</sub> ) <sub>3</sub> CC <sub>6</sub> H <sub>4</sub> I ( <b>XII</b> with $n = 8$ )                                                         | -1.59                 |
| 1,3,4-((R <sub>f6</sub> ) <sub>2</sub> C)O <sub>2</sub> C <sub>6</sub> H <sub>3</sub> I <sup>b</sup> ( <b>XIII</b> with $n = 6$ )                        | -2.43                 |

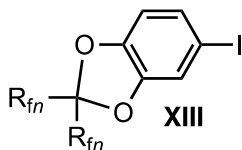

<sup>a</sup>Computations were conducted using the stereoisomer with *S* configurations at all carbon stereocenters. <sup>b</sup>These formulae are potentially ambiguous. The iodine atom occupies the 1 position (and the methyl group in **I-Me** the 2 position).

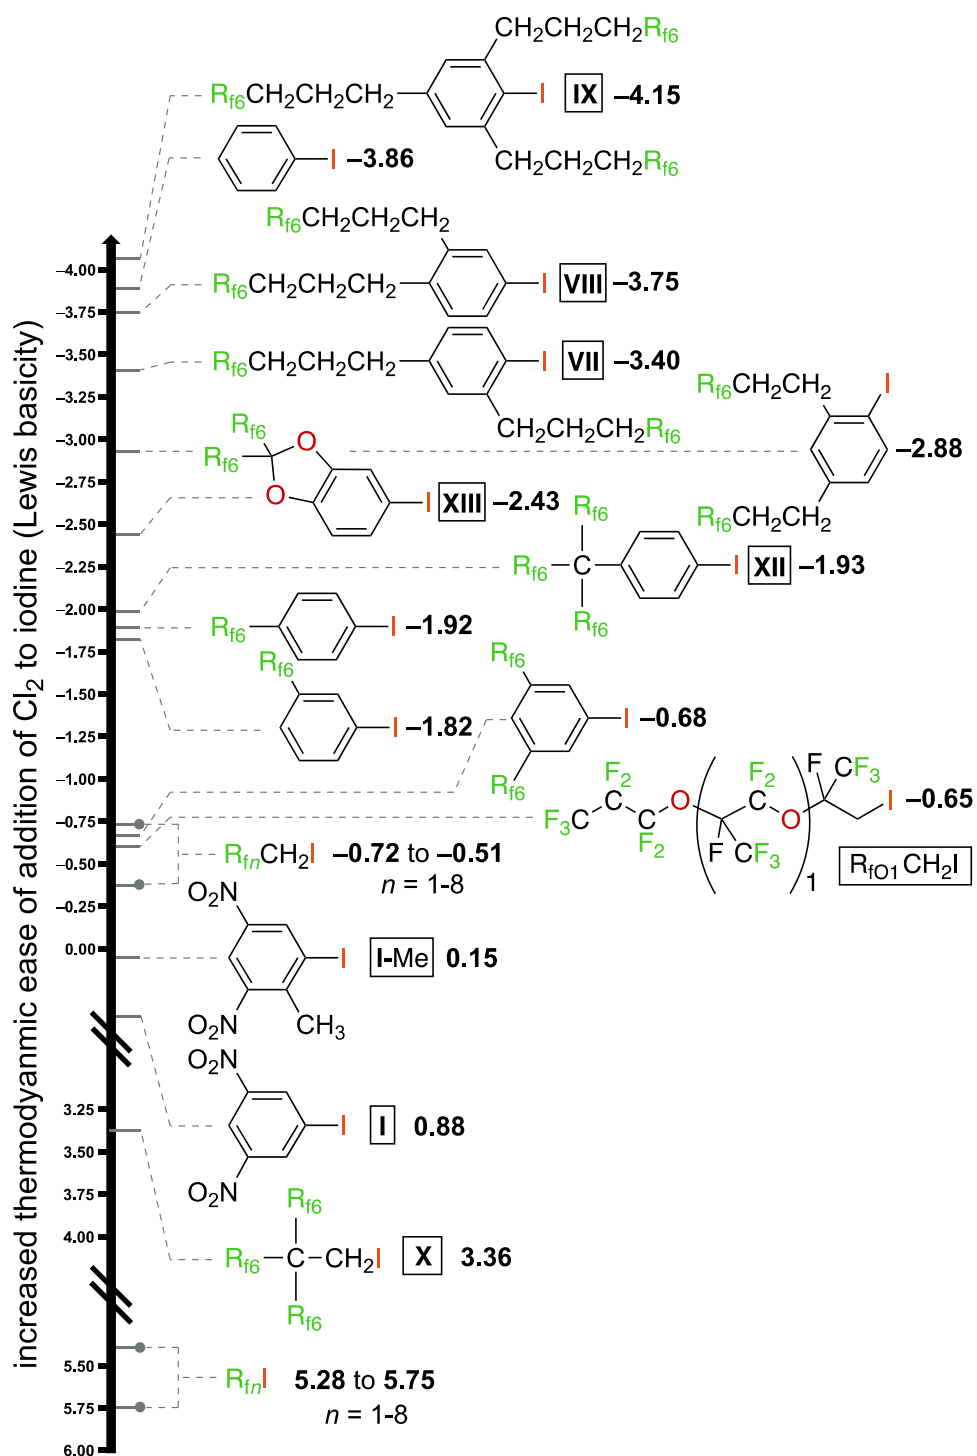

**Figure S3.** Free energies of chlorination of all of the types of aryl and alkyl iodides in Table S1 to the corresponding iodine(III) dichlorides in the gas phase (kcal/mol), presented in a ladder format (each iodide is more Lewis basic than that shown below it).

## References

(s1) The triplets commonly observed for  $\text{CF}_2\text{CF}_2\text{CF}_3$  and  $\text{CF}_2\text{CF}_2\text{CF}_2\text{X}$  signals have been shown to be four bond and *not* three bond (vicinal) couplings [s2,s3].

(s2) White, H. F. *Anal. Chem.* **1966**, 38, 625-626.

(s3) Foris, A. *Magn. Reson. Chem.* **2004**, 42, 534-555.

(s4) These microanalytical data feature one or more values outside of normally accepted ranges but are presented nonetheless as the best fit obtained to date, and/or to illustrate a point made in the text.

(s5) The additional coupling or increased multiplicity associated with this signal as compared to the  $\text{R}_{\text{fn}}$  analog may be due to diastereomers reflecting the multiple carbon stereocenters.

(s6) This triplet may represent two overlapping doublets.

(s7) Ghosh, S. K.; Ojeda, A. S.; Guerrero-Leal, J.; Bhuvanesh, N.; Gladysz, J. A. *Inorg. Chem.* **2013**, 52, 9369-9378.

(s8) van den Broeke, J.; Deelman, J. B.; van Koten, G. *Tetrahedron Lett.* **2001**, 42, 8085-8087.

(s9) This formula is potentially ambiguous. For all benzenoid compounds in the paper, any iodine substituent is assigned the 1-position.

(s10) Su, H.-L.; Balogh, J.; Al-Hashimi, M.; Seapy, D. G.; Bazzi, H. S.; Gladysz, J. A. *Org. Biomol. Chem.* **2016**, 10058-10069.

(s11) These represent the two largest triplets associated with the quartet of triplets that can often be seen for the  $^{13}\text{C}\{^1\text{H}\}$  signal of the terminal carbon atom of  $\text{CF}_2\text{CF}_3$  groups: Ribeiro, A. A. *J. Fluor. Chem.* **1997**, 83, 61-66 (see Figure 1 therein). The presence of two inequivalent  $(\text{CF}_2)_7\text{CF}_3$  groups in this molecule renders assigning exact chemical shifts to the remaining (overlapping) triplets difficult. For spectra with related complications, see the supporting information of the following paper: Richter, B.; de Wolf, E.; van Koten, G.; Deelman, B.-J. *J. Org. Chem.* **2000**, 65, 3885-3893.
