# Supplementary material for: Syntheses, structures, and stabilities of aliphatic and aromatic fluorous iodine(I) and iodine(III) compounds: the role of iodine Lewis basicity
Source: Beilstein J Org Chem. 2017 Nov 23;13:2486–501. doi: 10.3762/bjoc.13.246 (PMC5704765; doi:10.3762/bjoc.13.246)
Supplement: File 2 — Molecular structure file. [file Beilstein_J_Org_Chem-13-2486-s002.mol2]

#  Title
# Created by Agui 10.1.7
#

#
#

@<TRIPOS>MOLECULE
1_a_rf1i
5 4
SMALL
NO_CHARGES


@<TRIPOS>ATOM
1 I1     0.0000     0.0000     0.9801 I
2 F2     0.0000     1.2510    -1.6600 F
3 F3    -1.0834    -0.6255    -1.6600 F
4 C4     0.0000     0.0000    -1.1874 C
5 F5     1.0834    -0.6255    -1.6600 F
@<TRIPOS>BOND
1 1 4 1
2 2 4 1
3 3 4 1
4 4 5 1

#  Title
# Created by Agui 10.1.7
#

#
#

@<TRIPOS>MOLECULE
1_b_rf1icl2
7 3
SMALL
NO_CHARGES


@<TRIPOS>ATOM
1 I1     0.1839    -0.7167     0.0000 I
2 Cl2     0.1443    -0.6525    -2.5010 Cl
3 Cl3     0.1443    -0.6525     2.5010 Cl
4 F4     0.1443     2.0485     1.0805 F
5 F5     0.1443     2.0485    -1.0805 F
6 C6    -0.3587     1.4923     0.0000 C
7 F7    -1.6776     1.5939     0.0000 F
@<TRIPOS>BOND
1 4 6 1
2 5 6 1
3 6 7 1

#  Title
# Created by Agui 10.1.7
#

#
#

@<TRIPOS>MOLECULE
2_a_rf2i
8 7
SMALL
NO_CHARGES


@<TRIPOS>ATOM
1 C1     1.4298    -0.8889     0.0000 C
2 C2     0.7057     0.4896     0.0000 C
3 F3     1.1033    -1.5929     1.0886 F
4 F4     1.1033    -1.5929    -1.0886 F
5 I5    -1.4591     0.3062     0.0000 I
6 F6     2.7554    -0.6959     0.0000 F
7 F7     1.1033     1.1724    -1.0903 F
8 F8     1.1033     1.1724     1.0903 F
@<TRIPOS>BOND
1 1 2 1
2 1 3 1
3 1 4 1
4 1 6 1
5 2 5 1
6 2 7 1
7 2 8 1

#  Title
# Created by Agui 10.1.7
#

#
#

@<TRIPOS>MOLECULE
2_b_rf2icl21
10 6
SMALL
NO_CHARGES


@<TRIPOS>ATOM
1 C1     0.2961    -2.0364     0.0000 C
2 C2     1.0180    -0.6549     0.0000 C
3 F3    -0.4628    -2.1633     1.0870 F
4 F4    -0.4628    -2.1633    -1.0870 F
5 I5    -0.5011     1.0641     0.0000 I
6 Cl6    -0.4628     1.0327     2.5010 Cl
7 Cl7    -0.4628     1.0327    -2.5010 Cl
8 F8     1.7627    -0.5227    -1.0847 F
9 F9     1.7627    -0.5227     1.0847 F
10 F10     1.2234    -3.0014     0.0000 F
@<TRIPOS>BOND
1 1 2 1
2 1 3 1
3 1 4 1
4 1 10 1
5 2 8 1
6 2 9 1


#  Title
# Created by Agui 10.1.7
#

#
#

@<TRIPOS>MOLECULE
3_a_rf3i
11 10
SMALL
NO_CHARGES


@<TRIPOS>ATOM
1 C1     2.3659    -0.6412     0.0000 C
2 C2     0.8016    -0.7112     0.0000 C
3 C3     0.0634     0.6627     0.0000 C
4 F4     0.4321    -1.4028     1.0993 F
5 F5     0.4321    -1.4028    -1.0993 F
6 F6     2.8164    -0.0086     1.0874 F
7 F7     2.8164    -0.0086    -1.0874 F
8 I8    -2.1001     0.4152     0.0000 I
9 F9     0.4321     1.3627    -1.0896 F
10 F10     0.4321     1.3627     1.0896 F
11 F11     2.8520    -1.8877     0.0000 F
@<TRIPOS>BOND
1 1 2 1
2 1 6 1
3 1 7 1
4 1 11 1
5 2 3 1
6 2 4 1
7 2 5 1
8 3 8 1
9 3 9 1
10 3 10 1

#  Title
# Created by Agui 10.1.7
#

#
#

@<TRIPOS>MOLECULE
3_b_rf3icl2
13 9
SMALL
NO_CHARGES


@<TRIPOS>ATOM
1 C1    -2.0476     2.0930     0.0000 C
2 C2    -1.3218     0.7032     0.0000 C
3 C3     0.2351     0.7871     0.0000 C
4 F4    -1.7167     0.0309    -1.0967 F
5 F5    -1.7167     0.0309     1.0967 F
6 F6    -1.7167     2.7942    -1.0874 F
7 F7    -1.7167     2.7942     1.0874 F
8 I8     1.1321    -1.3339     0.0000 I
9 Cl9     1.1335    -1.2870    -2.5021 Cl
10 Cl10     1.1335    -1.2870     2.5021 Cl
11 F11    -3.3656     1.8885     0.0000 F
12 F12     0.6864     1.3949     1.0845 F
13 F13     0.6864     1.3949    -1.0845 F
@<TRIPOS>BOND
1 1 2 1
2 1 6 1
3 1 7 1
4 1 11 1
5 2 3 1
6 2 4 1
7 2 5 1
8 3 12 1
9 3 13 1

#  Title
# Created by Agui 10.1.7
#

#
#

@<TRIPOS>MOLECULE
4_a_rf4i
14 13
SMALL
NO_CHARGES


@<TRIPOS>ATOM
1 C1    -3.0259    -0.4431     0.0657 C
2 C2    -1.7905     0.4999    -0.1330 C
3 C3    -0.3957    -0.2141    -0.0263 C
4 C4     0.8255     0.7549     0.0969 C
5 F5    -0.2404    -0.9727    -1.1319 F
6 F6    -0.4023    -1.0211     1.0582 F
7 F7    -1.8962     1.0573    -1.3567 F
8 F8    -1.8785     1.4751     0.7974 F
9 F9    -2.9481    -1.5075    -0.7398 F
10 F10    -3.1107    -0.8599     1.3310 F
11 I11     2.7183    -0.3195    -0.0185 I
12 F12     0.7627     1.4042     1.2723 F
13 F13     0.7667     1.6678    -0.8917 F
14 F14    -4.1363     0.2398    -0.2322 F
@<TRIPOS>BOND
1 1 2 1
2 1 9 1
3 1 10 1
4 1 14 1
5 2 3 1
6 2 7 1
7 2 8 1
8 3 4 1
9 3 5 1
10 3 6 1
11 4 11 1
12 4 12 1
13 4 13 1

#  Title
# Created by Agui 10.1.7
#

#
#

@<TRIPOS>MOLECULE
4_b_rf4icl2
16 12
SMALL
NO_CHARGES


@<TRIPOS>ATOM
1 C1    -3.5295     0.1315    -0.4734 C
2 C2    -2.3231    -0.2156     0.4638 C
3 C3    -0.9070     0.0256    -0.1734 C
4 C4     0.2561    -0.0145     0.8710 C
5 F5    -0.8861     1.2320    -0.7716 F
6 F6    -0.6904    -0.9266    -1.0991 F
7 F7    -2.4405     0.5379     1.5792 F
8 F8    -2.4216    -1.5149     0.8045 F
9 F9    -3.6114     1.4476    -0.6736 F
10 F10    -3.4012    -0.4845    -1.6524 F
11 Cl11     2.2619     2.5131    -0.1111 Cl
12 Cl12     2.2471    -2.4886    -0.2609 Cl
13 I13     2.2868     0.0130    -0.2217 I
14 F14     0.2230    -1.1246     1.5899 F
15 F15     0.2359     1.0435     1.6610 F
16 F16    -4.6556    -0.2846     0.1119 F
@<TRIPOS>BOND
1 1 2 1
2 1 9 1
3 1 10 1
4 1 16 1
5 2 3 1
6 2 7 1
7 2 8 1
8 3 4 1
9 3 5 1
10 3 6 1
11 4 14 1
12 4 15 1

#  Title
# Created by Agui 10.1.7
#

#
#

@<TRIPOS>MOLECULE
5_a_rf5i
17 16
SMALL
NO_CHARGES


@<TRIPOS>ATOM
1 C1    -3.7553     0.0174     0.1777 C
2 C2    -2.3526    -0.5323    -0.2510 C
3 C3    -1.1566     0.4455     0.0319 C
4 C4     0.2546    -0.2513    -0.0143 C
5 C5     1.4596     0.7386    -0.1380 C
6 F6     0.2920    -1.0914    -1.0722 F
7 F7     0.3957    -0.9678     1.1198 F
8 F8    -1.2025     1.4339    -0.8861 F
9 F9    -1.3196     0.9898     1.2577 F
10 F10    -3.9572     1.2410    -0.3230 F
11 F11    -3.8651     0.0660     1.5069 F
12 F12    -2.4010    -0.7853    -1.5743 F
13 F13    -2.1552    -1.6942     0.4095 F
14 I14     3.3690    -0.2879     0.0885 I
15 F15     1.3461     1.6908     0.8085 F
16 F16     1.4267     1.3358    -1.3416 F
17 F17    -4.6992    -0.8018    -0.2971 F
@<TRIPOS>BOND
1 1 2 1
2 1 10 1
3 1 11 1
4 1 17 1
5 2 3 1
6 2 12 1
7 2 13 1
8 3 4 1
9 3 8 1
10 3 9 1
11 4 5 1
12 4 6 1
13 4 7 1
14 5 14 1
15 5 15 1
16 5 16 1

#  Title
# Created by Agui 10.1.7
#

#
#

@<TRIPOS>MOLECULE
5_b_rf5icl2
19 15
SMALL
NO_CHARGES


@<TRIPOS>ATOM
1 C1    -4.3149     0.1718    -0.0642 C
2 C2    -2.9048    -0.3705    -0.4786 C
3 C3    -1.7290     0.1095     0.4437 C
4 C4    -0.3021    -0.1019    -0.1903 C
5 C5     0.8527    -0.0102     0.8611 C
6 F6    -0.1077     0.8421    -1.1282 F
7 F7    -0.2427    -1.3168    -0.7667 F
8 F8    -1.8793     1.4234     0.7084 F
9 F9    -1.7939    -0.5753     1.6062 F
10 F10    -4.4095     1.4817    -0.2976 F
11 F11    -4.5440    -0.0601     1.2330 F
12 F12    -2.6695     0.0296    -1.7468 F
13 F13    -2.9555    -1.7161    -0.4453 F
14 Cl14     2.7442     2.5446    -0.2616 Cl
15 Cl15     2.9672    -2.4519    -0.1067 Cl
16 I16     2.8894     0.0469    -0.2195 I
17 F17     0.8741    -1.0658     1.6538 F
18 F18     0.7674     1.0999     1.5762 F
19 F19    -5.2443    -0.4598    -0.7860 F
@<TRIPOS>BOND
1 1 2 1
2 1 10 1
3 1 11 1
4 1 19 1
5 2 3 1
6 2 12 1
7 2 13 1
8 3 4 1
9 3 8 1
10 3 9 1
11 4 5 1
12 4 6 1
13 4 7 1
14 5 17 1
15 5 18 1

#  Title
# Created by Agui 10.1.7
#

#
#

@<TRIPOS>MOLECULE
6_a_rf6i
20 19
SMALL
NO_CHARGES


@<TRIPOS>ATOM
1 C1    -4.3822    -0.3875    -0.1506 C
2 C2    -3.0890     0.3519     0.3339 C
3 C3    -1.7461    -0.3379    -0.0960 C
4 C4    -0.4877     0.5984     0.0349 C
5 C5     0.8792    -0.1845     0.0426 C
6 C6     2.1350     0.7083    -0.2291 C
7 F7     0.8364    -1.1467    -0.9056 F
8 F8     1.0142    -0.7657     1.2522 F
9 F9    -0.5018     1.4650    -0.9989 F
10 F10    -0.5813     1.2963     1.1872 F
11 F11    -3.1309     1.6075    -0.1637 F
12 F12    -3.1346     0.4127     1.6796 F
13 F13    -1.8525    -0.7308    -1.3838 F
14 F14    -1.5711    -1.4307     0.6773 F
15 F15    -4.5304    -0.2777    -1.4722 F
16 F16    -4.3368    -1.6832     0.1784 F
17 I17     3.9880    -0.3983     0.0759 I
18 F18     2.1058     1.7724     0.5968 F
19 F19     2.1000     1.1575    -1.4953 F
20 F20    -5.4417     0.1699     0.4441 F
@<TRIPOS>BOND
1 1 2 1
2 1 15 1
3 1 16 1
4 1 20 1
5 2 3 1
6 2 11 1
7 2 12 1
8 3 4 1
9 3 13 1
10 3 14 1
11 4 5 1
12 4 9 1
13 4 10 1
14 5 6 1
15 5 7 1
16 5 8 1
17 6 17 1
18 6 18 1
19 6 19 1

#  Title
# Created by Agui 10.1.7
#

#
#

@<TRIPOS>MOLECULE
6_b_rf6icl2
22 18
SMALL
NO_CHARGES


@<TRIPOS>ATOM
1 C1    -4.9678     0.2775    -0.3617 C
2 C2    -3.6857    -0.4416     0.1795 C
3 C3    -2.3334     0.2187    -0.2668 C
4 C4    -1.0960    -0.2513     0.5837 C
5 C5     0.2886     0.0458    -0.1084 C
6 C6     1.4965    -0.0396     0.8823 C
7 F7     0.2704     1.2852    -0.6337 F
8 F8     0.4759    -0.8496    -1.0939 F
9 F9    -1.1284     0.3841     1.7743 F
10 F10    -1.1804    -1.5797     0.7971 F
11 F11    -3.7581    -0.4429     1.5289 F
12 F12    -3.7119    -1.7141    -0.2619 F
13 F13    -2.4407     1.5588    -0.1521 F
14 F14    -2.1179    -0.0918    -1.5625 F
15 F15    -5.1328     1.4647     0.2242 F
16 F16    -4.8866     0.4494    -1.6855 F
17 Cl17     3.4564     2.5300    -0.0792 Cl
18 Cl18     3.4359    -2.4610    -0.4390 Cl
19 I19     3.4780     0.0368    -0.2958 I
20 F20     1.4924    -1.1814     1.5511 F
21 F21     1.5141     0.9817     1.7188 F
22 F22    -6.0312    -0.4843    -0.0903 F
@<TRIPOS>BOND
1 1 2 1
2 1 15 1
3 1 16 1
4 1 22 1
5 2 3 1
6 2 11 1
7 2 12 1
8 3 4 1
9 3 13 1
10 3 14 1
11 4 5 1
12 4 9 1
13 4 10 1
14 5 6 1
15 5 7 1
16 5 8 1
17 6 20 1
18 6 21 1

#  Title
# Created by Agui 10.1.7
#

#
#

@<TRIPOS>MOLECULE
7_a_rf7i
23 22
SMALL
NO_CHARGES


@<TRIPOS>ATOM
1 C1    -5.0668    -0.0142     0.2913 C
2 C2    -3.7144    -0.4243    -0.3845 C
3 C3    -2.4539     0.3229     0.1786 C
4 C4    -1.0919    -0.3662    -0.2030 C
5 C5     0.1551     0.5808    -0.0364 C
6 C6     1.5262    -0.1928     0.0214 C
7 C7     2.7838     0.7070    -0.2171 C
8 F8     1.5207    -1.1625    -0.9200 F
9 F9     1.6265    -0.7636     1.2393 F
10 F10     0.1703     1.4413    -1.0750 F
11 F11     0.0190     1.2840     1.1086 F
12 F12    -2.4633     1.5836    -0.3052 F
13 F13    -2.5447     0.3736     1.5249 F
14 F14    -1.1528    -0.7666    -1.4907 F
15 F15    -0.9327    -1.4501     0.5850 F
16 F16    -5.2094     1.3157     0.2926 F
17 F17    -5.1302    -0.4615     1.5469 F
18 F18    -3.8217    -0.1632    -1.7023 F
19 F19    -3.5631    -1.7560    -0.2119 F
20 I20     4.6339    -0.3826     0.1587 I
21 F21     2.7197     1.7781     0.5978 F
22 F22     2.7873     1.1447    -1.4877 F
23 F23    -6.0731    -0.5536    -0.4038 F
@<TRIPOS>BOND
1 1 2 1
2 1 16 1
3 1 17 1
4 1 23 1
5 2 3 1
6 2 18 1
7 2 19 1
8 3 4 1
9 3 12 1
10 3 13 1
11 4 5 1
12 4 14 1
13 4 15 1
14 5 6 1
15 5 10 1
16 5 11 1
17 6 7 1
18 6 8 1
19 6 9 1
20 7 20 1
21 7 21 1
22 7 22 1

#  Title
# Created by Agui 10.1.7
#

#
#

@<TRIPOS>MOLECULE
7_b_rf7icl2
25 21
SMALL
NO_CHARGES


@<TRIPOS>ATOM
1 C1    -5.6838    -0.2715    -0.1748 C
2 C2    -4.3325     0.5132    -0.2848 C
3 C3    -3.0794    -0.2760     0.2357 C
4 C4    -1.7102     0.3361    -0.2397 C
5 C5    -0.4804    -0.1594     0.6082 C
6 C6     0.9064     0.0818    -0.1016 C
7 C7     2.1201    -0.0241     0.8803 C
8 F8     0.9225     1.3117    -0.6487 F
9 F9     1.0567    -0.8363    -1.0723 F
10 F10    -0.4800     0.4958     1.7883 F
11 F11    -0.6047    -1.4811     0.8435 F
12 F12    -3.1131    -0.2787     1.5857 F
13 F13    -3.1512    -1.5499    -0.2040 F
14 F14    -1.7734     1.6800    -0.1463 F
15 F15    -1.5148    -0.0061    -1.5300 F
16 F16    -5.8492    -0.7516     1.0626 F
17 F17    -5.7219    -1.2824    -1.0447 F
18 F18    -4.4582     1.6474     0.4316 F
19 F19    -4.1520     0.8324    -1.5852 F
20 Cl20     4.1531     2.4612    -0.1475 Cl
21 Cl21     3.9674    -2.5324    -0.4102 Cl
22 I22     4.0921    -0.0349    -0.3160 I
23 F23     2.0850    -1.1522     1.5710 F
24 F24     2.1786     1.0118     1.6967 F
25 F25    -6.6879     0.5660    -0.4496 F
@<TRIPOS>BOND
1 1 2 1
2 1 16 1
3 1 17 1
4 1 25 1
5 2 3 1
6 2 18 1
7 2 19 1
8 3 4 1
9 3 12 1
10 3 13 1
11 4 5 1
12 4 14 1
13 4 15 1
14 5 6 1
15 5 10 1
16 5 11 1
17 6 7 1
18 6 8 1
19 6 9 1
20 7 23 1
21 7 24 1

#  Title
# Created by Agui 10.1.7
#

#
#

@<TRIPOS>MOLECULE
8_a_rf8i
26 25
SMALL
NO_CHARGES


@<TRIPOS>ATOM
1 C1    -5.7215    -0.2768    -0.2213 C
2 C2    -4.3970     0.1757     0.4819 C
3 C3    -3.0850    -0.3254    -0.2193 C
4 C4    -1.7936     0.4486     0.2376 C
5 C5    -0.4577    -0.3107    -0.1033 C
6 C6     0.8147     0.6163    -0.0606 C
7 C7     2.1683    -0.1826     0.0463 C
8 C8     3.4404     0.6555    -0.3108 C
9 F9     2.1173    -1.2428    -0.7904 F
10 F10     2.2846    -0.6287     1.3138 F
11 F11     0.8258     1.3667    -1.1815 F
12 F12     0.7228     1.4351     1.0095 F
13 F13    -1.7838     1.6515    -0.3744 F
14 F14    -1.8487     0.6363     1.5730 F
15 F15    -0.5595    -0.8352    -1.3431 F
16 F16    -0.3029    -1.3141     0.7854 F
17 F17    -4.3995     1.5265     0.5195 F
18 F18    -4.4232    -0.2974     1.7436 F
19 F19    -3.2223    -0.1776    -1.5543 F
20 F20    -2.9355    -1.6382     0.0595 F
21 F21    -5.8824     0.3493    -1.3886 F
22 F22    -5.7170    -1.5980    -0.4301 F
23 I23     5.2733    -0.4350     0.1388 I
24 F24     3.4199     1.8069     0.3887 F
25 F25     3.4243     0.9583    -1.6201 F
26 F26    -6.7530     0.0295     0.5717 F
@<TRIPOS>BOND
1 1 2 1
2 1 21 1
3 1 22 1
4 1 26 1
5 2 3 1
6 2 17 1
7 2 18 1
8 3 4 1
9 3 19 1
10 3 20 1
11 4 5 1
12 4 13 1
13 4 14 1
14 5 6 1
15 5 15 1
16 5 16 1
17 6 7 1
18 6 11 1
19 6 12 1
20 7 8 1
21 7 9 1
22 7 10 1
23 8 23 1
24 8 24 1
25 8 25 1

#  Title
# Created by Agui 10.1.7
#

#
#

@<TRIPOS>MOLECULE
8_b_rf8icl2
28 24
SMALL
NO_CHARGES


@<TRIPOS>ATOM
1 C1    -6.3639     0.3246    -0.2013 C
2 C2    -5.0405    -0.5078    -0.1054 C
3 C3    -3.7272     0.3477    -0.1914 C
4 C4    -2.4449    -0.4198     0.3006 C
5 C5    -1.1004     0.2410    -0.1818 C
6 C6     0.1554    -0.2371     0.6382 C
7 C7     1.5240     0.0582    -0.0864 C
8 C8     2.7549    -0.0326     0.8752 C
9 F9     1.4967     1.2988    -0.6083 F
10 F10     1.6859    -0.8355    -1.0780 F
11 F11     0.1555     0.3935     1.8317 F
12 F12     0.0720    -1.5663     0.8475 F
13 F13    -2.4566    -0.4466     1.6501 F
14 F14    -2.4865    -1.6855    -0.1641 F
15 F15    -1.1996     1.5804    -0.0579 F
16 F16    -0.9133    -0.0683    -1.4814 F
17 F17    -5.0643    -1.1752     1.0693 F
18 F18    -5.0440    -1.3992    -1.1158 F
19 F19    -3.8775     1.4551     0.5657 F
20 F20    -3.5499     0.7201    -1.4771 F
21 F21    -6.5464     1.0612     0.8961 F
22 F22    -6.3374     1.1291    -1.2695 F
23 Cl23     4.6964     2.5349    -0.1274 Cl
24 Cl24     4.6574    -2.4553    -0.4968 Cl
25 I25     4.7081     0.0421    -0.3496 I
26 F26     2.7639    -1.1761     1.5411 F
27 F27     2.7952     0.9865     1.7135 F
28 F28    -7.3920    -0.5200    -0.3238 F
@<TRIPOS>BOND
1 1 2 1
2 1 21 1
3 1 22 1
4 1 28 1
5 2 3 1
6 2 17 1
7 2 18 1
8 3 4 1
9 3 19 1
10 3 20 1
11 4 5 1
12 4 13 1
13 4 14 1
14 5 6 1
15 5 15 1
16 5 16 1
17 6 7 1
18 6 11 1
19 6 12 1
20 7 8 1
21 7 9 1
22 7 10 1
23 8 26 1
24 8 27 1

# Molecule Name
# Created by Agui 10.1.7
#

#
#

@<TRIPOS>MOLECULE
9_a_rf1ch2i
8 7
SMALL
NO_CHARGES


@<TRIPOS>ATOM
1 C1     1.3829     1.0366     0.0000 C
2 C2    -0.1277     1.1005     0.0000 C
3 H3    -0.4616     1.6226     0.8925 H
4 H4    -0.4616     1.6226    -0.8925 H
5 F5     1.8794     0.4168     1.0875 F
6 F6     1.8794     0.4168    -1.0875 F
7 I7    -1.0821    -0.8353     0.0000 I
8 F8     1.8794     2.2999     0.0000 F
@<TRIPOS>BOND
1 1 2 1
2 1 5 1
3 1 6 1
4 1 8 1
5 2 3 1
6 2 4 1
7 2 7 1

#  Title
# Created by Agui 10.1.7
#

#
#

@<TRIPOS>MOLECULE
9_b_rf1ch2icl2
10 7
SMALL
NO_CHARGES


@<TRIPOS>ATOM
1 C1     0.5342     2.0207     0.0000 C
2 C2     1.1534     0.6334     0.0000 C
3 H3     1.7330     0.4733    -0.9058 H
4 H4     1.7330     0.4733     0.9058 H
5 F5    -0.2207     2.2486    -1.0848 F
6 F6    -0.2207     2.2486     1.0848 F
7 I7    -0.3017    -0.9717     0.0000 I
8 Cl8    -0.2207    -0.9456    -2.5153 Cl
9 Cl9    -0.2207    -0.9456     2.5153 Cl
10 F10     1.5420     2.9225     0.0000 F
@<TRIPOS>BOND
1 1 2 1
2 1 5 1
3 1 6 1
4 1 10 1
5 2 3 1
6 2 4 1
7 2 7 1

#  Title
# Created by Agui 10.1.7
#

#
#

@<TRIPOS>MOLECULE
10_a_rf2ch2i
11 10
SMALL
NO_CHARGES


@<TRIPOS>ATOM
1 C1    -1.6928    -1.7338     0.0000 C
2 C2    -0.9366    -0.3707     0.0000 C
3 C3     0.5669    -0.5471     0.0000 C
4 H4     0.8771    -1.0843     0.8922 H
5 H5     0.8771    -1.0843    -0.8922 H
6 F6    -1.3597     0.3111     1.0989 F
7 F7    -1.3597     0.3111    -1.0989 F
8 F8    -1.3597    -2.4492     1.0883 F
9 F9    -1.3597    -2.4492    -1.0883 F
10 I10     1.6357     1.3307     0.0000 I
11 F11    -3.0138    -1.5512     0.0000 F
@<TRIPOS>BOND
1 1 2 1
2 1 8 1
3 1 9 1
4 1 11 1
5 2 3 1
6 2 6 1
7 2 7 1
8 3 4 1
9 3 5 1
10 3 10 1

#  Title
# Created by Agui 10.1.7
#

#
#

@<TRIPOS>MOLECULE
10_b_rf2ch2icl2
13 10
SMALL
NO_CHARGES


@<TRIPOS>ATOM
1 C1    -1.3236     2.5644     0.0000 C
2 C2    -0.2279     1.4520     0.0000 C
3 C3    -0.8473     0.0645     0.0000 C
4 H4    -1.4242    -0.1119     0.9046 H
5 H5    -1.4242    -0.1119    -0.9046 H
6 F6     0.5468     1.6477     1.0953 F
7 F7     0.5468     1.6477    -1.0953 F
8 F8    -2.1002     2.4420     1.0883 F
9 F9    -2.1002     2.4420    -1.0883 F
10 I10     0.6325    -1.5212     0.0000 I
11 Cl11     0.5468    -1.5063     2.5158 Cl
12 Cl12     0.5468    -1.5063    -2.5158 Cl
13 F13    -0.7680     3.7732     0.0000 F
@<TRIPOS>BOND
1 1 2 1
2 1 8 1
3 1 9 1
4 1 13 1
5 2 3 1
6 2 6 1
7 2 7 1
8 3 4 1
9 3 5 1
10 3 10 1

#  Title
# Created by Agui 10.1.7
#

#
#

@<TRIPOS>MOLECULE
11_a_rf3ch2i
14 13
SMALL
NO_CHARGES


@<TRIPOS>ATOM
1 C1     2.6333     1.3535     0.0000 C
2 C2     1.0732     1.4185     0.0000 C
3 C3     0.3013     0.0585     0.0000 C
4 C4    -1.1991     0.2769     0.0000 C
5 H5    -1.4950     0.8215     0.8921 H
6 H6    -1.4950     0.8215    -0.8921 H
7 F7     0.6979    -0.6400     1.0985 F
8 F8     0.6979    -0.6400    -1.0985 F
9 F9     0.6979     2.1208     1.0989 F
10 F10     0.6979     2.1208    -1.0989 F
11 F11     3.0875     0.7252     1.0875 F
12 F12     3.0875     0.7252    -1.0875 F
13 I13    -2.3131    -1.5741     0.0000 I
14 F14     3.1148     2.6039     0.0000 F
@<TRIPOS>BOND
1 1 2 1
2 1 11 1
3 1 12 1
4 1 14 1
5 2 3 1
6 2 9 1
7 2 10 1
8 3 4 1
9 3 7 1
10 3 8 1
11 4 5 1
12 4 6 1
13 4 13 1

#  Title
# Created by Agui 10.1.7
#

#
#

@<TRIPOS>MOLECULE
11_b_rf3ch2icl2
16 13
SMALL
NO_CHARGES


@<TRIPOS>ATOM
1 C1     1.3080     3.2449     0.0000 C
2 C2     0.0731     2.2883     0.0000 C
3 C3     0.3712     0.7520     0.0000 C
4 C4    -0.9291    -0.0384     0.0000 C
5 H5    -1.5041     0.1429     0.9045 H
6 H6    -1.5041     0.1429    -0.9045 H
7 F7     1.1173     0.4625     1.0950 F
8 F8     1.1173     0.4625    -1.0950 F
9 F9    -0.6680     2.5725     1.0986 F
10 F10    -0.6680     2.5725    -1.0986 F
11 F11     2.0578     3.0537     1.0876 F
12 F12     2.0578     3.0537    -1.0876 F
13 I13    -0.6066    -2.1831     0.0000 I
14 Cl14    -0.6680    -2.1246     2.5156 Cl
15 Cl15    -0.6680    -2.1246    -2.5156 Cl
16 F16     0.8672     4.5084     0.0000 F
@<TRIPOS>BOND
1 1 2 1
2 1 11 1
3 1 12 1
4 1 16 1
5 2 3 1
6 2 9 1
7 2 10 1
8 3 4 1
9 3 7 1
10 3 8 1
11 4 5 1
12 4 6 1
13 4 13 1

#  Title
# Created by Agui 10.1.7
#

#
#

@<TRIPOS>MOLECULE
12_a_rf4ch2i
17 16
SMALL
NO_CHARGES


@<TRIPOS>ATOM
1 C1    -3.6122     0.1592     0.1157 C
2 C2    -2.2167    -0.5144    -0.1138 C
3 C3    -1.0040     0.4776    -0.1120 C
4 C4     0.4151    -0.1738     0.0275 C
5 C5     1.5127     0.8448    -0.2113 C
6 H6     1.4538     1.2278    -1.2255 H
7 H7     1.4268     1.6565     0.5063 H
8 F8     0.4886    -1.1980    -0.8672 F
9 F9     0.5045    -0.7042     1.2756 F
10 F10    -1.0400     1.1747    -1.2765 F
11 F11    -1.1569     1.3609     0.9075 F
12 F12    -3.7897     1.1853    -0.7251 F
13 F13    -3.7312     0.6006     1.3702 F
14 F14    -2.2601    -1.1388    -1.3090 F
15 F15    -2.0557    -1.4398     0.8554 F
16 I16     3.4913     0.0097     0.0259 I
17 F17    -4.5693    -0.7473    -0.1078 F
@<TRIPOS>BOND
1 1 2 1
2 1 12 1
3 1 13 1
4 1 17 1
5 2 3 1
6 2 14 1
7 2 15 1
8 3 4 1
9 3 10 1
10 3 11 1
11 4 5 1
12 4 8 1
13 4 9 1
14 5 6 1
15 5 7 1
16 5 16 1

#  Title
# Created by Agui 10.1.7
#

#
#

@<TRIPOS>MOLECULE
12_b_rf4ch2icl2
19 16
SMALL
NO_CHARGES


@<TRIPOS>ATOM
1 C1     4.2006     0.1578     0.1322 C
2 C2     2.8133    -0.2712    -0.4559 C
3 C3     1.5912     0.0227     0.4793 C
4 C4     0.1816    -0.0506    -0.2061 C
5 C5    -0.9177     0.0099     0.8454 C
6 H6    -0.9134    -0.8723     1.4795 H
7 H7    -0.8701     0.9349     1.4153 H
8 F8     0.1117    -1.2030    -0.9187 F
9 F9     0.0757     0.9825    -1.0759 F
10 F10     1.6108    -0.8786     1.4933 F
11 F11     1.7227     1.2603     1.0153 F
12 F12     4.3650    -0.3377     1.3643 F
13 F13     4.3085     1.4872     0.1797 F
14 F14     2.8620    -1.5976    -0.6919 F
15 F15     2.6538     0.3765    -1.6288 F
16 Cl16    -2.9223    -2.4810     0.1209 Cl
17 Cl17    -2.8041     2.5472    -0.0153 Cl
18 I18    -2.9052     0.0318    -0.0225 I
19 F19     5.1670    -0.3211    -0.6561 F
@<TRIPOS>BOND
1 1 2 1
2 1 12 1
3 1 13 1
4 1 19 1
5 2 3 1
6 2 14 1
7 2 15 1
8 3 4 1
9 3 10 1
10 3 11 1
11 4 5 1
12 4 8 1
13 4 9 1
14 5 6 1
15 5 7 1
16 5 18 1

#  Title
# Created by Agui 10.1.7
#

#
#

@<TRIPOS>MOLECULE
13_a_rf5ch2i
20 19
SMALL
NO_CHARGES


@<TRIPOS>ATOM
1 C1    -4.2043    -0.3573    -0.0735 C
2 C2    -2.9058     0.4773     0.1907 C
3 C3    -1.5665    -0.3143    -0.0207 C
4 C4    -0.3014     0.6072    -0.1494 C
5 C5     1.0810    -0.1034     0.0595 C
6 C6     2.2303     0.8103    -0.3197 C
7 H7     2.1763     1.0625    -1.3743 H
8 H8     2.2026     1.7112     0.2877 H
9 F9     1.0802    -1.2361    -0.6972 F
10 F10     1.1630    -0.4738     1.3643 F
11 F11    -0.3121     1.1562    -1.3903 F
12 F12    -0.3909     1.6132     0.7565 F
13 F13    -2.9372     1.5445    -0.6390 F
14 F14    -2.9555     0.9149     1.4651 F
15 F15    -1.6726    -1.0481    -1.1508 F
16 F16    -1.4110    -1.1525     1.0244 F
17 F17    -4.3486    -0.6214    -1.3739 F
18 F18    -4.1742    -1.5086     0.6060 F
19 I19     4.1622    -0.1014     0.0050 I
20 F20    -5.2608     0.3542     0.3346 F
@<TRIPOS>BOND
1 1 2 1
2 1 17 1
3 1 18 1
4 1 20 1
5 2 3 1
6 2 13 1
7 2 14 1
8 3 4 1
9 3 15 1
10 3 16 1
11 4 5 1
12 4 11 1
13 4 12 1
14 5 6 1
15 5 9 1
16 5 10 1
17 6 7 1
18 6 8 1
19 6 19 1

# Molecule Name
# Created by Agui 10.1.7
#

#
#

@<TRIPOS>MOLECULE
13_b_rf5ch2icl2
22 19
SMALL
NO_CHARGES


@<TRIPOS>ATOM
1 C1    -4.8368     0.2122    -0.2827 C
2 C2    -3.5336    -0.3862     0.3471 C
3 C3    -2.1992     0.1584    -0.2754 C
4 C4    -0.9313    -0.1289     0.6058 C
5 C5     0.4452     0.0069    -0.1365 C
6 C6     1.5894    -0.0409     0.8667 C
7 H7     1.5835     0.8256     1.5221 H
8 H8     1.5960    -0.9801     1.4150 H
9 F9     0.4469     1.1778    -0.8224 F
10 F10     0.5490    -1.0013    -1.0348 F
11 F11    -0.9312     0.7422     1.6451 F
12 F12    -1.0045    -1.3852     1.1061 F
13 F13    -3.5582    -0.1085     1.6701 F
14 F14    -3.5749    -1.7229     0.1808 F
15 F15    -2.3064     1.4951    -0.4349 F
16 F16    -2.0387    -0.4111    -1.4871 F
17 F17    -4.9835     1.4957     0.0510 F
18 F18    -4.8082     0.1063    -1.6154 F
19 Cl19     3.4785     2.5324     0.1217 Cl
20 Cl20     3.5202    -2.4924    -0.1349 Cl
21 I21     3.5381     0.0244    -0.0833 I
22 F22    -5.8879    -0.4713     0.1808 F
@<TRIPOS>BOND
1 1 2 1
2 1 17 1
3 1 18 1
4 1 22 1
5 2 3 1
6 2 13 1
7 2 14 1
8 3 4 1
9 3 15 1
10 3 16 1
11 4 5 1
12 4 11 1
13 4 12 1
14 5 6 1
15 5 9 1
16 5 10 1
17 6 7 1
18 6 8 1
19 6 21 1

#  Title
# Created by Agui 10.1.7
#

#
#

@<TRIPOS>MOLECULE
14_a_rf6ch2i
23 22
SMALL
NO_CHARGES


@<TRIPOS>ATOM
1 C1    -4.8587     0.1348     0.2425 C
2 C2    -3.5070    -0.5037    -0.2250 C
3 C3    -2.2438     0.3948     0.0222 C
4 C4    -0.8830    -0.3906    -0.0662 C
5 C5     0.3669     0.5407    -0.2618 C
6 C6     1.7569    -0.1128     0.0568 C
7 C7     2.8978     0.7806    -0.3901 C
8 H8     2.8671     0.9174    -1.4666 H
9 H9     2.8363     1.7403     0.1163 H
10 F10     1.7987    -1.3197    -0.5734 F
11 F11     1.8111    -0.3394     1.3955 F
12 F12     0.3804     0.9542    -1.5540 F
13 F13     0.2333     1.6348     0.5297 F
14 F14    -2.2479     1.3831    -0.8992 F
15 F15    -2.3390     0.9485     1.2507 F
16 F16    -0.9433    -1.2429    -1.1127 F
17 F17    -0.7380    -1.1040     1.0683 F
18 F18    -4.9949     1.3696    -0.2542 F
19 F19    -4.9283     0.1901     1.5739 F
20 F20    -3.6107    -0.7537    -1.5457 F
21 F21    -3.3646    -1.6749     0.4332 F
22 I22     4.8379    -0.0480     0.0776 I
23 F23    -5.8666    -0.6211    -0.2048 F
@<TRIPOS>BOND
1 1 2 1
2 1 18 1
3 1 19 1
4 1 23 1
5 2 3 1
6 2 20 1
7 2 21 1
8 3 4 1
9 3 14 1
10 3 15 1
11 4 5 1
12 4 16 1
13 4 17 1
14 5 6 1
15 5 12 1
16 5 13 1
17 6 7 1
18 6 10 1
19 6 11 1
20 7 8 1
21 7 9 1
22 7 22 1

#  Title
# Created by Agui 10.1.7
#

#
#

@<TRIPOS>MOLECULE
14_b_rf6ch2icl2
25 22
SMALL
NO_CHARGES


@<TRIPOS>ATOM
1 C1    -5.5188    -0.2846    -0.0065 C
2 C2    -4.1720     0.4585    -0.3027 C
3 C3    -2.9033    -0.2234     0.3212 C
4 C4    -1.5478     0.2791    -0.3002 C
5 C5    -0.2946    -0.0496     0.5884 C
6 C6     1.0899     0.0425    -0.1463 C
7 C7     2.2259    -0.0438     0.8636 C
8 H8     2.2445     0.8217     1.5200 H
9 H9     2.1985    -0.9833     1.4107 H
10 F10     1.1335     1.2136    -0.8303 F
11 F11     1.1664    -0.9674    -1.0455 F
12 F12    -0.2710     0.8194     1.6289 F
13 F13    -0.4107    -1.3041     1.0858 F
14 F14    -2.9004     0.0293     1.6485 F
15 F15    -2.9886    -1.5578     0.1344 F
16 F16    -1.6103     1.6180    -0.4593 F
17 F17    -1.3971    -0.2983    -1.5087 F
18 F18    -5.6477    -0.5218     1.3037 F
19 F19    -5.5832    -1.4413    -0.6682 F
20 F20    -4.2785     1.7084     0.1897 F
21 F21    -4.0322     0.5255    -1.6447 F
22 Cl22     4.2028     2.4667     0.1312 Cl
23 Cl23     4.0814    -2.5567    -0.1278 Cl
24 I24     4.1814    -0.0418    -0.0748 I
25 F25    -6.5316     0.4911    -0.4046 F
@<TRIPOS>BOND
1 1 2 1
2 1 18 1
3 1 19 1
4 1 25 1
5 2 3 1
6 2 20 1
7 2 21 1
8 3 4 1
9 3 14 1
10 3 15 1
11 4 5 1
12 4 16 1
13 4 17 1
14 5 6 1
15 5 12 1
16 5 13 1
17 6 7 1
18 6 10 1
19 6 11 1
20 7 8 1
21 7 9 1
22 7 24 1

#  Title
# Created by Agui 10.1.7
#

#
#

@<TRIPOS>MOLECULE
15_a_rf7ch2i
26 25
SMALL
NO_CHARGES


@<TRIPOS>ATOM
1 C1    -5.4902    -0.3173    -0.1258 C
2 C2    -4.1664     0.3716     0.3497 C
3 C3    -2.8537    -0.3650    -0.0962 C
4 C4    -1.5613     0.5237     0.0263 C
5 C5    -0.2252    -0.3086     0.0143 C
6 C6     1.0480     0.5551    -0.3049 C
7 C7     2.4231    -0.0991     0.0715 C
8 C8     3.5824     0.7003    -0.4912 C
9 H9     3.5389     0.7106    -1.5759 H
10 H10     3.5565     1.7142    -0.1007 H
11 F11     2.4199    -1.3723    -0.4127 F
12 F12     2.4919    -0.1687     1.4268 F
13 F13     1.0536     0.8138    -1.6367 F
14 F14     0.9588     1.7379     0.3541 F
15 F15    -1.5494     1.3932    -1.0070 F
16 F16    -1.6204     1.2197     1.1818 F
17 F17    -0.3264    -1.2746    -0.9251 F
18 F18    -0.0817    -0.8887     1.2224 F
19 F19    -4.1663     1.6304    -0.1425 F
20 F20    -4.1975     0.4284     1.6959 F
21 F21    -2.9885    -0.7489    -1.3840 F
22 F22    -2.7100    -1.4656     0.6724 F
23 F23    -5.6473    -0.1948    -1.4454 F
24 F24    -5.4892    -1.6154     0.1962 F
25 I25     5.5046    -0.1267     0.0474 I
26 F26    -6.5230     0.2753     0.4820 F
@<TRIPOS>BOND
1 1 2 1
2 1 23 1
3 1 24 1
4 1 26 1
5 2 3 1
6 2 19 1
7 2 20 1
8 3 4 1
9 3 21 1
10 3 22 1
11 4 5 1
12 4 15 1
13 4 16 1
14 5 6 1
15 5 17 1
16 5 18 1
17 6 7 1
18 6 13 1
19 6 14 1
20 7 8 1
21 7 11 1
22 7 12 1
23 8 9 1
24 8 10 1
25 8 25 1

#  Title
# Created by Agui 10.1.7
#

#
#

@<TRIPOS>MOLECULE
15_b_rf7ch2icl2
28 25
SMALL
NO_CHARGES


@<TRIPOS>ATOM
1 C1    -6.1786     0.2902    -0.1608 C
2 C2    -4.8517    -0.5113     0.0638 C
3 C3    -3.5423     0.3071    -0.2186 C
4 C4    -2.2474    -0.3522     0.3843 C
5 C5    -0.9141     0.1956    -0.2485 C
6 C6     0.3593    -0.1123     0.6189 C
7 C7     1.7305     0.0256    -0.1336 C
8 C8     2.8826    -0.0439     0.8594 C
9 H9     2.8878     0.8132     1.5270 H
10 H10     2.8874    -0.9908     1.3942 H
11 F11     1.7339     1.2063    -0.8025 F
12 F12     1.8208    -0.9702    -1.0470 F
13 F13     0.3754     0.7433     1.6706 F
14 F14     0.2829    -1.3758     1.1008 F
15 F15    -2.2308    -0.1143     1.7135 F
16 F16    -2.2991    -1.6849     0.1790 F
17 F17    -1.0142     1.5347    -0.3861 F
18 F18    -0.7635    -0.3598    -1.4671 F
19 F19    -4.8473    -0.9370     1.3465 F
20 F20    -4.8785    -1.5828    -0.7529 F
21 F21    -3.6782     1.5418     0.3106 F
22 F22    -3.3978     0.4206    -1.5561 F
23 F23    -6.3372     1.2260     0.7772 F
24 F24    -6.1794     0.8723    -1.3649 F
25 Cl25     4.7824     2.5273     0.1342 Cl
26 Cl26     4.7892    -2.4937    -0.1913 Cl
27 I27     4.8239     0.0220    -0.1056 I
28 F28    -7.2079    -0.5596    -0.0930 F
@<TRIPOS>BOND
1 1 2 1
2 1 23 1
3 1 24 1
4 1 28 1
5 2 3 1
6 2 19 1
7 2 20 1
8 3 4 1
9 3 21 1
10 3 22 1
11 4 5 1
12 4 15 1
13 4 16 1
14 5 6 1
15 5 17 1
16 5 18 1
17 6 7 1
18 6 13 1
19 6 14 1
20 7 8 1
21 7 11 1
22 7 12 1
23 8 9 1
24 8 10 1
25 8 27 1

#  Title
# Created by Agui 10.1.7
#

#
#

@<TRIPOS>MOLECULE
16_a_rf8ch2i
29 28
SMALL
NO_CHARGES


@<TRIPOS>ATOM
1 C1     6.1311     0.0995    -0.3443 C
2 C2     4.8057    -0.4126     0.3151 C
3 C3     3.5106     0.3333    -0.1654 C
4 C4     2.1800    -0.4332     0.1773 C
5 C5     0.8991     0.4790     0.1087 C
6 C6    -0.4446    -0.3357     0.0105 C
7 C7    -1.7169     0.5089     0.3808 C
8 C8    -3.0887    -0.0906    -0.0874 C
9 C9    -4.2536     0.6653     0.5219 C
10 H10    -4.2364     0.5720     1.6033 H
11 H11    -4.2086     1.7114     0.2305 H
12 F12    -3.1091    -1.4039     0.2738 F
13 F13    -3.1256    -0.0308    -1.4444 F
14 F14    -1.7520     0.6406     1.7307 F
15 F15    -1.6007     1.7476    -0.1608 F
16 F16     0.8687     1.2476     1.2184 F
17 F17     0.9928     1.2790    -0.9751 F
18 F18    -0.3753    -1.3874     0.8559 F
19 F19    -0.5647    -0.7968    -1.2502 F
20 F20     3.4850     1.5489     0.4226 F
21 F21     3.5766     0.4994    -1.5036 F
22 F22     2.2788    -0.9376     1.4255 F
23 F23     2.0427    -1.4514    -0.6975 F
24 F24     6.2284     1.4293    -0.2370 F
25 F25     6.1876    -0.2399    -1.6335 F
26 F26     4.9274    -0.2571     1.6484 F
27 F27     4.6970    -1.7300     0.0350 F
28 F28     7.1674    -0.4595     0.2886 F
29 I29    -6.1701    -0.0839    -0.1379 I
@<TRIPOS>BOND
1 1 2 1
2 1 24 1
3 1 25 1
4 1 28 1
5 2 3 1
6 2 26 1
7 2 27 1
8 3 4 1
9 3 20 1
10 3 21 1
11 4 5 1
12 4 22 1
13 4 23 1
14 5 6 1
15 5 16 1
16 5 17 1
17 6 7 1
18 6 18 1
19 6 19 1
20 7 8 1
21 7 14 1
22 7 15 1
23 8 9 1
24 8 12 1
25 8 13 1
26 9 10 1
27 9 11 1
28 9 29 1

#  Title
# Created by Agui 10.1.7
#

#
#

@<TRIPOS>MOLECULE
16_b_rf8ch2icl2
31 28
SMALL
NO_CHARGES


@<TRIPOS>ATOM
1 C1    -6.8375    -0.3282    -0.1662 C
2 C2    -5.5158     0.5077    -0.0767 C
3 C3    -4.2166    -0.3505     0.1236 C
4 C4    -2.8899     0.4358    -0.1880 C
5 C5    -1.6062    -0.2438     0.4181 C
6 C6    -0.2651     0.2616    -0.2337 C
7 C7     1.0069    -0.0611     0.6306 C
8 C8     2.3757     0.0318    -0.1330 C
9 C9     3.5326    -0.0484     0.8536 C
10 H10     3.5627     0.8194     1.5065 H
11 H11     3.5186    -0.9861     1.4042 H
12 F12     2.4024     1.2007    -0.8217 F
13 F13     2.4363    -0.9810    -1.0301 F
14 F14     1.0503     0.8115     1.6674 F
15 F15     0.9044    -1.3142     1.1344 F
16 F16    -1.5731     0.0159     1.7426 F
17 F17    -1.6902    -1.5784     0.2352 F
18 F18    -0.3348     1.6001    -0.3940 F
19 F19    -0.1359    -0.3183    -1.4432 F
20 F20    -4.1868    -0.7746     1.4055 F
21 F21    -4.2763    -1.4267    -0.6891 F
22 F22    -2.9920     1.6818     0.3199 F
23 F23    -2.7506     0.5177    -1.5277 F
24 F24    -6.9289    -1.1765     0.8640 F
25 F25    -6.8912    -1.0186    -1.3067 F
26 F26    -5.6395     1.3568     0.9625 F
27 F27    -5.4102     1.2232    -1.2181 F
28 F28    -7.8772     0.5104    -0.1263 F
29 Cl29     5.4877     2.4641     0.0716 Cl
30 Cl30     5.3734    -2.5605    -0.1672 Cl
31 I31     5.4682    -0.0452    -0.1250 I
@<TRIPOS>BOND
1 1 2 1
2 1 24 1
3 1 25 1
4 1 28 1
5 2 3 1
6 2 26 1
7 2 27 1
8 3 4 1
9 3 20 1
10 3 21 1
11 4 5 1
12 4 22 1
13 4 23 1
14 5 6 1
15 5 16 1
16 5 17 1
17 6 7 1
18 6 18 1
19 6 19 1
20 7 8 1
21 7 14 1
22 7 15 1
23 8 9 1
24 8 12 1
25 8 13 1
26 9 10 1
27 9 11 1
28 9 31 1

#  Title
# Created by Agui 10.1.7
#

#
#

@<TRIPOS>MOLECULE
17_a_ether_1
24 23
SMALL
NO_CHARGES


@<TRIPOS>ATOM
1 C1     0.1765    -0.8089     0.3317 C
2 C2    -2.2391    -0.3419     0.1065 C
3 C3    -3.0038     1.0027    -0.1348 C
4 F4    -2.7012    -1.2792    -0.7493 F
5 F5    -2.4724    -0.7792     1.3567 F
6 F6    -2.7172     1.4432    -1.3763 F
7 C7     1.4398     0.0359    -0.1129 C
8 C8     0.1551    -2.2895    -0.1843 C
9 F9     0.1955    -0.8769     1.6991 F
10 F10     1.3086    -2.9100     0.1261 F
11 F11    -0.0104    -2.3411    -1.5047 F
12 F12    -0.8369    -2.9659     0.4047 F
13 O13    -0.9115    -0.0657    -0.1220 O
14 F14     1.1626     1.3197     0.2365 F
15 F15     1.5062    -0.0173    -1.4716 F
16 H16     3.0254    -1.3957     0.1905 H
17 H17     2.6593    -0.3752     1.6051 H
18 C18     2.7455    -0.4030     0.5228 C
19 I19     4.3964     0.8931    -0.0024 I
20 C20    -4.5598     0.9258    -0.0068 C
21 F21    -5.0645     2.1496    -0.1934 F
22 F22    -5.0761     0.1062    -0.9269 F
23 F23    -4.9187     0.4956     1.2072 F
24 F24    -2.5627     1.9040     0.7664 F
@<TRIPOS>BOND
1 1 7 1
2 1 8 1
3 1 9 1
4 1 13 1
5 2 3 1
6 2 4 1
7 2 5 1
8 2 13 1
9 3 6 1
10 3 20 1
11 3 24 1
12 7 14 1
13 7 15 1
14 7 18 1
15 8 10 1
16 8 11 1
17 8 12 1
18 16 18 1
19 17 18 1
20 18 19 1
21 20 21 1
22 20 22 1
23 20 23 1

#  Title
# Created by Agui 10.1.7
#

#
#

@<TRIPOS>MOLECULE
17_b_ether1icl2
26 23
SMALL
NO_CHARGES


@<TRIPOS>ATOM
1 C1    -0.4438    -0.7417     0.6009 C
2 C2    -2.8365    -0.2977     0.1957 C
3 C3    -3.5510     0.8978    -0.5190 C
4 F4    -3.3243    -1.4632    -0.2772 F
5 F5    -3.0815    -0.2549     1.5160 F
6 F6    -3.2441     0.8569    -1.8310 F
7 C7     0.8494    -0.1624    -0.1075 C
8 C8    -0.5158    -2.3075     0.6456 C
9 F9    -0.4103    -0.3178     1.9017 F
10 F10     0.6252    -2.8020     1.1649 F
11 F11    -0.6854    -2.8201    -0.5700 F
12 F12    -1.5218    -2.6992     1.4314 F
13 O13    -1.4956    -0.1628    -0.0976 O
14 F14     0.6477     1.1725    -0.2279 F
15 F15     0.9139    -0.6828    -1.3580 F
16 H16     2.4360    -1.4635     0.6299 H
17 H17     2.0754    -0.0369     1.6792 H
18 C18     2.1363    -0.4216     0.6646 C
19 C19    -5.1092     0.9206    -0.3954 C
20 F20    -5.5698     2.0134    -1.0111 F
21 F21    -5.6496    -0.1562    -0.9727 F
22 F22    -5.4847     0.9599     0.8870 F
23 F23    -3.0791     2.0443     0.0102 F
24 I24     3.8369     0.6284    -0.1857 I
25 Cl25     4.2764    -1.3960    -1.6182 Cl
26 Cl26     3.3528     2.5440     1.3733 Cl
@<TRIPOS>BOND
1 1 7 1
2 1 8 1
3 1 9 1
4 1 13 1
5 2 3 1
6 2 4 1
7 2 5 1
8 2 13 1
9 3 6 1
10 3 19 1
11 3 23 1
12 7 14 1
13 7 15 1
14 7 18 1
15 8 10 1
16 8 11 1
17 8 12 1
18 16 18 1
19 17 18 1
20 18 24 1
21 19 20 1
22 19 21 1
23 19 22 1

#  Title
# Created by Agui 10.1.7
#

#
#

@<TRIPOS>MOLECULE
18_a_ether2i
34 33
SMALL
NO_CHARGES


@<TRIPOS>ATOM
1 C1    -1.9422     1.1942     0.1227 C
2 C2     0.3835     0.4738     0.3232 C
3 C3     1.4855    -0.0914    -0.6507 C
4 C4     3.8947    -0.4695    -0.2404 C
5 C5     4.8549     0.1702     0.8181 C
6 F6     0.8414     1.6295     0.8458 F
7 F7     0.1929    -0.3832     1.3443 F
8 F8     1.6294     0.7999    -1.6672 F
9 F9     4.0664    -1.8076    -0.2495 F
10 F10     4.1948    -0.0061    -1.4652 F
11 F11     4.4999    -0.2713     2.0418 F
12 C12    -3.0625     0.0925    -0.0154 C
13 C13    -2.2080     2.5401    -0.6290 C
14 F14    -1.8260     1.4988     1.4464 F
15 F15    -3.3519     3.1008    -0.1923 F
16 F16    -2.3019     2.3551    -1.9451 F
17 F17    -1.2098     3.3914    -0.3832 F
18 O18    -0.7541     0.6710    -0.4149 O
19 C19     1.1322    -1.4769    -1.2999 C
20 F20     1.0503    -2.4267    -0.3645 F
21 F21     2.0908    -1.8142    -2.1736 F
22 F22    -0.0246    -1.4163    -1.9601 F
23 O23     2.6203    -0.1338     0.1591 O
24 F24    -2.5321    -1.0267     0.5506 F
25 F25    -3.2259    -0.1587    -1.3420 F
26 F26     4.6989     1.5092     0.7704 F
27 C27     6.3746    -0.1391     0.6245 C
28 F28     6.6149    -1.4480     0.7403 F
29 F29     7.0653     0.5075     1.5691 F
30 F30     6.7971     0.2754    -0.5742 F
31 H31    -4.8373     1.2993     0.1571 H
32 H32    -4.2180     0.6604     1.7011 H
33 C33    -4.3778     0.4481     0.6478 C
34 I34    -5.8210    -1.1602     0.5482 I
@<TRIPOS>BOND
1 1 12 1
2 1 13 1
3 1 14 1
4 1 18 1
5 2 3 1
6 2 6 1
7 2 7 1
8 2 18 1
9 3 8 1
10 3 19 1
11 3 23 1
12 4 5 1
13 4 9 1
14 4 10 1
15 4 23 1
16 5 11 1
17 5 26 1
18 5 27 1
19 12 24 1
20 12 25 1
21 12 33 1
22 13 15 1
23 13 16 1
24 13 17 1
25 19 20 1
26 19 21 1
27 19 22 1
28 27 28 1
29 27 29 1
30 27 30 1
31 31 33 1
32 32 33 1
33 33 34 1

#  Title
# Created by Agui 10.1.7
#

#
#

@<TRIPOS>MOLECULE
18_b_ether2icl2
36 33
SMALL
NO_CHARGES


@<TRIPOS>ATOM
1 C1     1.3170     0.9095    -0.7747 C
2 C2    -1.1212     0.6090    -0.5930 C
3 C3    -2.0279    -0.4862     0.0879 C
4 C4    -4.4862    -0.5950     0.2986 C
5 C5    -5.5724     0.5283     0.2033 C
6 F6    -1.5475     1.8197    -0.1872 F
7 F7    -1.2566     0.5518    -1.9292 F
8 F8    -1.7460    -0.4833     1.4165 F
9 F9    -4.8556    -1.6440    -0.4641 F
10 F10    -4.3824    -1.0238     1.5672 F
11 F11    -5.6144     0.9767    -1.0679 F
12 C12     2.5067     0.3039     0.0794 C
13 C13     1.3212     2.4760    -0.8670 C
14 F14     1.4670     0.4478    -2.0553 F
15 F15     2.5356     2.9020    -1.2686 F
16 F16     1.0455     3.0332     0.3087 F
17 F17     0.4300     2.8887    -1.7706 F
18 O18     0.1755     0.3844    -0.1810 O
19 C19    -1.7750    -1.9448    -0.4397 C
20 F20    -2.1816    -2.0628    -1.7068 F
21 F21    -2.4572    -2.8136     0.3160 F
22 F22    -0.4805    -2.2592    -0.3720 F
23 O23    -3.3191    -0.0260    -0.1652 O
24 F24     2.2408    -1.0175     0.2174 F
25 F25     2.4638     0.8626     1.3144 F
26 F26    -5.2018     1.5394     1.0152 F
27 C27    -7.0212     0.1005     0.6045 C
28 F28    -7.4837    -0.8466    -0.2161 F
29 F29    -7.8202     1.1685     0.5191 F
30 F30    -7.0520    -0.3591     1.8593 F
31 H31     4.2192     1.5168    -0.5143 H
32 H32     3.9010     0.0852    -1.5704 H
33 C33     3.8762     0.4889    -0.5616 C
34 I34     5.4307    -0.6179     0.4760 I
35 Cl35     5.8187     1.4147     1.9112 Cl
36 Cl36     5.0146    -2.5433    -1.0914 Cl
@<TRIPOS>BOND
1 1 12 1
2 1 13 1
3 1 14 1
4 1 18 1
5 2 3 1
6 2 6 1
7 2 7 1
8 2 18 1
9 3 8 1
10 3 19 1
11 3 23 1
12 4 5 1
13 4 9 1
14 4 10 1
15 4 23 1
16 5 11 1
17 5 26 1
18 5 27 1
19 12 24 1
20 12 25 1
21 12 33 1
22 13 15 1
23 13 16 1
24 13 17 1
25 19 20 1
26 19 21 1
27 19 22 1
28 27 28 1
29 27 29 1
30 27 30 1
31 31 33 1
32 32 33 1
33 33 34 1

#  Title
# Created by Agui 10.1.7
#

#
#

@<TRIPOS>MOLECULE
19_a_ether3i
44 43
SMALL
NO_CHARGES


@<TRIPOS>ATOM
1 C1    -3.7185     0.7301     0.7171 C
2 C2    -1.2630     0.5347     0.5929 C
3 C3    -0.2966    -0.5538    -0.0151 C
4 C4     2.1641    -0.5895    -0.1722 C
5 C5     3.2675     0.5349    -0.1054 C
6 F6    -0.8754     1.7432     0.1416 F
7 F7    -1.1484     0.5432     1.9340 F
8 F8    -0.5616    -0.6472    -1.3442 F
9 F9     2.5187    -1.5744     0.6743 F
10 F10     2.1160    -1.1096    -1.4110 F
11 F11     3.1802     1.1243     1.1156 F
12 C12    -4.8662     0.0331    -0.1238 C
13 C13     5.7288     0.3417    -0.1703 C
14 C14     6.6684    -0.8734     0.1324 C
15 F15     6.4848    -1.8058    -0.8242 F
16 F16     6.0949     0.9134    -1.3359 F
17 F17     5.8511     1.2654     0.7977 F
18 C18    -3.7853     2.2982     0.7398 C
19 F19    -3.8595     0.3208     2.0172 F
20 F20    -5.0180     2.7055     1.0969 F
21 F21    -3.5000     2.8153    -0.4533 F
22 F22    -2.9263     2.7830     1.6423 F
23 O23    -2.5362     0.2376     0.1665 O
24 C24    -0.4926    -1.9878     0.6001 C
25 F25    -0.0762    -2.0177     1.8692 F
26 F26     0.2132    -2.8772    -0.1085 F
27 F27    -1.7760    -2.3504     0.5618 F
28 O28     0.9720    -0.0171     0.2120 O
29 C29     3.0948     1.6667    -1.1816 C
30 O30     4.4559    -0.1803    -0.2471 O
31 F31     3.9648     2.6532    -0.9315 F
32 F32     1.8631     2.1791    -1.1431 F
33 F33     3.3247     1.1898    -2.4077 F
34 F34    -4.5047    -1.2715    -0.2356 F
35 F35    -4.8388     0.5769    -1.3720 F
36 C36     8.1957    -0.5462     0.1900 C
37 F37     8.8598    -1.6636     0.5019 F
38 F38     8.6344    -0.1038    -0.9917 F
39 F39     8.4506     0.3781     1.1215 F
40 F40     6.3132    -1.3906     1.3263 F
41 H41    -6.5893     1.1612     0.5236 H
42 H42    -6.2381    -0.2916     1.4942 H
43 C43    -6.2481     0.1334     0.4949 C
44 I44    -7.7370    -0.9611    -0.6308 I
@<TRIPOS>BOND
1 1 12 1
2 1 18 1
3 1 19 1
4 1 23 1
5 2 3 1
6 2 6 1
7 2 7 1
8 2 23 1
9 3 8 1
10 3 24 1
11 3 28 1
12 4 5 1
13 4 9 1
14 4 10 1
15 4 28 1
16 5 11 1
17 5 29 1
18 5 30 1
19 12 34 1
20 12 35 1
21 12 43 1
22 13 14 1
23 13 16 1
24 13 17 1
25 13 30 1
26 14 15 1
27 14 36 1
28 14 40 1
29 18 20 1
30 18 21 1
31 18 22 1
32 24 25 1
33 24 26 1
34 24 27 1
35 29 31 1
36 29 32 1
37 29 33 1
38 36 37 1
39 36 38 1
40 36 39 1
41 41 43 1
42 42 43 1
43 43 44 1

#  Title
# Created by Agui 10.1.7
#

#
#

@<TRIPOS>MOLECULE
19_b_ether3icl2
46 43
SMALL
NO_CHARGES


@<TRIPOS>ATOM
1 C1     3.0560     0.7311    -0.9211 C
2 C2     0.6100     0.5105    -0.7308 C
3 C3    -0.3261    -0.4705     0.0745 C
4 C4    -2.7837    -0.5250     0.2665 C
5 C5    -3.9098     0.5503     0.0182 C
6 F6     0.2081     1.7728    -0.4940 F
7 F7     0.4864     0.2805    -2.0499 F
8 F8    -0.0442    -0.3179     1.3950 F
9 F9    -3.1248    -1.6491    -0.3897 F
10 F10    -2.7113    -0.8181     1.5761 F
11 F11    -3.8431     0.9202    -1.2876 F
12 C12     4.2232     0.2221     0.0225 C
13 C13    -6.3659     0.3277     0.1440 C
14 C14    -7.2846    -0.9378     0.0718 C
15 F15    -7.0735    -1.6840     1.1749 F
16 F16    -6.7310     1.0894     1.1954 F
17 F17    -6.5143     1.0642    -0.9696 F
18 C18     3.0970     2.2702    -1.2248 C
19 F19     3.2079     0.0965    -2.1251 F
20 F20     4.3244     2.6117    -1.6656 F
21 F21     2.8231     2.9877    -0.1391 F
22 F22     2.2236     2.5754    -2.1869 F
23 O23     1.8974     0.3163    -0.2761 O
24 C24    -0.1030    -1.9875    -0.2762 C
25 F25    -0.5240    -2.2510    -1.5161 F
26 F26    -0.7859    -2.7492     0.5857 F
27 F27     1.1887    -2.3099    -0.1839 F
28 O28    -1.6061    -0.0069    -0.2284 O
29 C29    -3.7502     1.8548     0.8798 C
30 O30    -5.0820    -0.1509     0.2950 O
31 F31    -4.6386     2.7686     0.4706 F
32 F32    -2.5274     2.3722     0.7407 F
33 F33    -3.9628     1.5944     2.1722 F
34 F34     3.9239    -1.0609     0.3387 F
35 F35     4.1833     0.9473     1.1680 F
36 C36    -8.8185    -0.6521    -0.0225 C
37 F37    -9.4638    -1.8179    -0.1260 F
38 F38    -9.2538    -0.0174     1.0693 F
39 F39    -9.0995     0.0908    -1.0977 F
40 F40    -6.9309    -1.6505    -1.0171 F
41 H41     5.9683     1.3012    -0.7172 H
42 H42     5.6266    -0.2595    -1.5621 H
43 C43     5.6022     0.2848    -0.6217 C
44 I44     7.1217    -0.6952     0.5818 I
45 Cl45     7.5420     1.5129     1.7174 Cl
46 Cl46     6.6777    -2.8156    -0.7002 Cl
@<TRIPOS>BOND
1 1 12 1
2 1 18 1
3 1 19 1
4 1 23 1
5 2 3 1
6 2 6 1
7 2 7 1
8 2 23 1
9 3 8 1
10 3 24 1
11 3 28 1
12 4 5 1
13 4 9 1
14 4 10 1
15 4 28 1
16 5 11 1
17 5 29 1
18 5 30 1
19 12 34 1
20 12 35 1
21 12 43 1
22 13 14 1
23 13 16 1
24 13 17 1
25 13 30 1
26 14 15 1
27 14 36 1
28 14 40 1
29 18 20 1
30 18 21 1
31 18 22 1
32 24 25 1
33 24 26 1
34 24 27 1
35 29 31 1
36 29 32 1
37 29 33 1
38 36 37 1
39 36 38 1
40 36 39 1
41 41 43 1
42 42 43 1
43 43 44 1

#  Title
# Created by Agui 10.1.7
#

#
#

@<TRIPOS>MOLECULE
20_a_I-Me
19 19
SMALL
NO_CHARGES


@<TRIPOS>ATOM
1 C1    -1.5371    -1.0513    -0.0164 C
2 C2    -0.1345    -1.1500    -0.0435 C
3 C3     0.5541     0.0806    -0.0188 C
4 C4    -0.1077     1.3037     0.0186 C
5 C5    -1.4961     1.3160     0.0180 C
6 C6    -2.2353     0.1470    -0.0091 C
7 H7     0.4299     2.2406     0.0431 H
8 H8    -3.3154     0.1668    -0.0187 H
9 N9    -2.3807    -2.2725     0.0201 N
10 O10    -2.0294    -3.1798     0.7607 O
11 O11    -3.3861    -2.2740    -0.6741 O
12 N12    -2.2055     2.6163     0.0484 N
13 O13    -3.4273     2.5883     0.0629 O
14 O14    -1.5215     3.6298     0.0565 O
15 C15     0.5906    -2.4654    -0.1253 C
16 H16     0.9190    -2.7819     0.8693 H
17 H17    -0.0363    -3.2582    -0.5254 H
18 H18     1.4777    -2.3629    -0.7503 H
19 I19     2.6743     0.1583    -0.0129 I
@<TRIPOS>BOND
1 1 2 Ar
2 1 6 Ar
3 1 9 1
4 2 3 Ar
5 2 15 1
6 3 4 Ar
7 3 19 1
8 4 5 Ar
9 4 7 1
10 5 6 2
11 5 12 1
12 6 8 1
13 9 10 2
14 9 11 2
15 12 13 2
16 12 14 2
17 15 16 1
18 15 17 1
19 15 18 1

#  Title
# Created by Agui 10.1.7
#

#
#

@<TRIPOS>MOLECULE
20_b_I-Me_cl2
21 19
SMALL
NO_CHARGES


@<TRIPOS>ATOM
1 C1     2.0404    -1.0422     0.0165 C
2 C2     0.6406    -1.1724     0.0403 C
3 C3    -0.0465     0.0535     0.0185 C
4 C4     0.5655     1.2965    -0.0153 C
5 C5     1.9531     1.3325    -0.0127 C
6 C6     2.7085     0.1743     0.0133 C
7 H7     0.0077     2.2221    -0.0390 H
8 H8     3.7886     0.2154     0.0277 H
9 N9     2.9139    -2.2445    -0.0158 N
10 O10     2.5729    -3.1679    -0.7393 O
11 O11     3.9265    -2.2081     0.6648 O
12 N12     2.6399     2.6469    -0.0384 N
13 O13     1.9344     3.6440    -0.0455 O
14 O14     3.8606     2.6373    -0.0502 O
15 C15    -0.0695    -2.4966     0.1104 C
16 H16    -0.3987    -2.7991    -0.8883 H
17 H17     0.5734    -3.2851     0.4912 H
18 H18    -0.9445    -2.4222     0.7561 H
19 I19    -2.1791     0.0928     0.0034 I
20 Cl20    -2.1261     0.0547     2.5248 Cl
21 Cl21    -2.0807     0.0756    -2.5137 Cl
@<TRIPOS>BOND
1 1 2 Ar
2 1 6 Ar
3 1 9 1
4 2 3 Ar
5 2 15 1
6 3 4 2
7 3 19 1
8 4 5 Ar
9 4 7 1
10 5 6 2
11 5 12 1
12 6 8 1
13 9 10 2
14 9 11 2
15 12 13 2
16 12 14 2
17 15 16 1
18 15 17 1
19 15 18 1

#  Title
# Created by Agui 10.1.7
#

#
#

@<TRIPOS>MOLECULE
21_a_I
16 16
SMALL
NO_CHARGES


@<TRIPOS>ATOM
1 C1     1.4935     1.1808     0.0000 C
2 C2     0.1026     1.2108    -0.0000 C
3 C3    -0.5876     0.0000    -0.0000 C
4 C4     0.1026    -1.2108     0.0000 C
5 C5     1.4936    -1.1808    -0.0000 C
6 C6     2.2213     0.0000    -0.0000 C
7 H7    -0.4076    -2.1635     0.0001 H
8 H8     3.3013     0.0001    -0.0000 H
9 N9     2.2323     2.4715    -0.0000 N
10 O10     1.5679     3.4973    -0.0002 O
11 O11     3.4521     2.4181     0.0002 O
12 N12     2.2323    -2.4715    -0.0001 N
13 O13     3.4522    -2.4181     0.0000 O
14 O14     1.5680    -3.4973    -0.0001 O
15 I15    -2.6984    -0.0000     0.0000 I
16 H16    -0.4077     2.1636    -0.0001 H
@<TRIPOS>BOND
1 1 2 Ar
2 1 6 Ar
3 1 9 1
4 2 3 Ar
5 2 16 1
6 3 4 Ar
7 3 15 1
8 4 5 Ar
9 4 7 1
10 5 6 Ar
11 5 12 1
12 6 8 1
13 9 10 2
14 9 11 2
15 12 13 2
16 12 14 2

#  Title
# Created by Agui 10.1.7
#

#
#

@<TRIPOS>MOLECULE
21_b_I_cl2
18 16
SMALL
NO_CHARGES


@<TRIPOS>ATOM
1 C1    -2.0025     1.1849     0.0002 C
2 C2    -0.6122     1.2186     0.0002 C
3 C3     0.0529     0.0000    -0.0001 C
4 C4    -0.6122    -1.2186    -0.0004 C
5 C5    -2.0025    -1.1849    -0.0004 C
6 C6    -2.7240     0.0000    -0.0001 C
7 H7    -0.0991    -2.1702    -0.0007 H
8 H8    -3.8047     0.0000    -0.0000 H
9 N9    -2.7444     2.4756     0.0005 N
10 O10    -2.0787     3.4989     0.0006 O
11 O11    -3.9627     2.4160     0.0006 O
12 N12    -2.7444    -2.4756    -0.0007 N
13 O13    -3.9627    -2.4160    -0.0003 O
14 O14    -2.0787    -3.4989    -0.0013 O
15 I15     2.1760     0.0000     0.0001 I
16 Cl16     2.0926    -0.0012     2.5170 Cl
17 Cl17     2.0933     0.0012    -2.5168 Cl
18 H18    -0.0991     2.1702     0.0004 H
@<TRIPOS>BOND
1 1 2 Ar
2 1 6 Ar
3 1 9 1
4 2 3 Ar
5 2 18 1
6 3 4 Ar
7 3 15 1
8 4 5 Ar
9 4 7 1
10 5 6 Ar
11 5 12 1
12 6 8 1
13 9 10 2
14 9 11 2
15 12 13 2
16 12 14 2

#  Title
# Created by Agui 10.1.7
#

#
#

@<TRIPOS>MOLECULE
22_a_c6h5i
12 12
SMALL
NO_CHARGES


@<TRIPOS>ATOM
1 C1    -2.6465    -1.2051     0.0000 C
2 C2    -1.2519    -1.2127     0.0000 C
3 C3    -0.5648     0.0000     0.0000 C
4 C4    -1.2519     1.2127     0.0000 C
5 C5    -2.6465     1.2051     0.0000 C
6 C6    -3.3464     0.0000     0.0000 C
7 H7    -3.1828    -2.1476     0.0000 H
8 H8    -0.7114    -2.1510     0.0000 H
9 H9    -0.7114     2.1510     0.0000 H
10 H10    -3.1828     2.1476     0.0000 H
11 H11    -4.4303     0.0000     0.0000 H
12 I12     1.5560     0.0000     0.0000 I
@<TRIPOS>BOND
1 1 2 Ar
2 1 6 Ar
3 1 7 1
4 2 3 Ar
5 2 8 1
6 3 4 Ar
7 3 12 1
8 4 5 Ar
9 4 9 1
10 5 6 Ar
11 5 10 1
12 6 11 1

#  Title
# Created by Agui 10.1.7
#

#
#

@<TRIPOS>MOLECULE
22_b_c6h5i_cl2
14 12
SMALL
NO_CHARGES


@<TRIPOS>ATOM
1 C1     3.0419     0.0000     1.2095 C
2 C2     1.6479     0.0000     1.2216 C
3 C3     0.9858     0.0000     0.0000 C
4 C4     1.6479     0.0000    -1.2216 C
5 C5     3.0419     0.0000    -1.2095 C
6 C6     3.7349     0.0000     0.0000 C
7 H7     3.5810    -0.0000     2.1494 H
8 H8     1.1041    -0.0000     2.1569 H
9 H9     1.1041     0.0000    -2.1569 H
10 H10     3.5810     0.0000    -2.1494 H
11 H11     4.8185     0.0000     0.0000 H
12 I12    -1.1371     0.0000     0.0000 I
13 Cl13    -1.1330     2.5321     0.0000 Cl
14 Cl14    -1.1330    -2.5321     0.0000 Cl
@<TRIPOS>BOND
1 1 2 Ar
2 1 6 Ar
3 1 7 1
4 2 3 Ar
5 2 8 1
6 3 4 Ar
7 3 12 1
8 4 5 Ar
9 4 9 1
10 5 6 Ar
11 5 10 1
12 6 11 1

2#  Title
# Created by Agui 10.1.7
#

#
#

@<TRIPOS>MOLECULE
23_a_1,3-rf6phi
30 30
SMALL
NO_CHARGES


@<TRIPOS>ATOM
1 C1    -3.5556     2.3886    -1.3196 C
2 C2    -4.4517     1.3427    -1.1058 C
3 C3    -4.0835     0.2869    -0.2736 C
4 C4    -2.8358     0.2651     0.3430 C
5 C5    -1.9493     1.3218     0.1198 C
6 C6    -2.3033     2.3835    -0.7137 C
7 H7    -2.5563    -0.5501     0.9958 H
8 H8    -1.6127     3.2001    -0.8778 H
9 C9    -0.5908     1.2969     0.7779 C
10 C10     0.4952     0.5557    -0.0791 C
11 C11     1.9762     0.7003     0.4249 C
12 C12     2.9557    -0.3707    -0.1830 C
13 C13     4.4719     0.0137    -0.0503 C
14 C14     5.4650    -1.1772    -0.2711 C
15 F15    -0.6561     0.6702     1.9868 F
16 F16    -0.1338     2.5665     0.9947 F
17 F17     0.1698    -0.7606    -0.1116 F
18 F18     0.4409     1.0401    -1.3424 F
19 F19     2.0108     0.5801     1.7679 F
20 F20     2.4224     1.9313     0.0876 F
21 F21     2.7513    -1.5468     0.4500 F
22 F22     2.6816    -0.5328    -1.4958 F
23 F23     4.7631     0.9598    -0.9658 F
24 F24     4.7074     0.5111     1.1837 F
25 F25     5.4055    -2.0464     0.7398 F
26 F26     5.1912    -1.8164    -1.4140 F
27 F27     6.7088    -0.6906    -0.3397 F
28 H28    -3.8405     3.2128    -1.9629 H
29 I29    -5.4395    -1.3028     0.0668 I
30 H30    -5.4244     1.3540    -1.5806 H
@<TRIPOS>BOND
1 1 2 Ar
2 1 6 Ar
3 1 28 1
4 2 3 Ar
5 2 30 1
6 3 4 Ar
7 3 29 1
8 4 5 Ar
9 4 7 1
10 5 6 Ar
11 5 9 1
12 6 8 1
13 9 10 1
14 9 15 1
15 9 16 1
16 10 11 1
17 10 17 1
18 10 18 1
19 11 12 1
20 11 19 1
21 11 20 1
22 12 13 1
23 12 21 1
24 12 22 1
25 13 14 1
26 13 23 1
27 13 24 1
28 14 25 1
29 14 26 1
30 14 27 1

#  Title
# Created by Agui 10.1.7
#

#
#

@<TRIPOS>MOLECULE
23_b_1,3-rf6phicl2
32 30
SMALL
NO_CHARGES


@<TRIPOS>ATOM
1 C1    -2.7759     2.0521    -2.1486 C
2 C2    -3.7216     1.1632    -1.6413 C
3 C3    -3.3915     0.4347    -0.5058 C
4 C4    -2.1691     0.5538     0.1396 C
5 C5    -1.2376     1.4511    -0.3864 C
6 C6    -1.5385     2.1955    -1.5282 C
7 H7    -1.9400    -0.0180     1.0280 H
8 H8    -0.8114     2.8924    -1.9241 H
9 C9     0.1082     1.6006     0.2867 C
10 C10     1.1832     0.6030    -0.2716 C
11 C11     2.6580     0.8569     0.2062 C
12 C12     3.6128    -0.3731    -0.0197 C
13 C13     5.1378    -0.0048     0.0349 C
14 C14     6.0958    -1.2311     0.2137 C
15 F15    -0.0071     1.3810     1.6250 F
16 F16     0.5925     2.8641     0.1104 F
17 F17     0.8092    -0.6480     0.0910 F
18 F18     1.1649     0.6811    -1.6234 F
19 F19     2.6590     1.1512     1.5223 F
20 F20     3.1476     1.9160    -0.4765 F
21 F21     3.3547    -1.2946     0.9334 F
22 F22     3.3579    -0.9173    -1.2293 F
23 F23     5.4772     0.6123    -1.1147 F
24 F24     5.3627     0.8375     1.0673 F
25 F25     5.9857    -1.7516     1.4374 F
26 F26     5.8245    -2.1784    -0.6909 F
27 F27     7.3555    -0.8187     0.0388 F
28 H28    -3.0102     2.6349    -3.0310 H
29 H29    -4.6849     1.0511    -2.1211 H
30 I30    -4.8246    -0.9157     0.2886 I
31 Cl31    -5.8077     0.9780     1.6422 Cl
32 Cl32    -3.8027    -2.7634    -1.0978 Cl
@<TRIPOS>BOND
1 1 2 Ar
2 1 6 Ar
3 1 28 1
4 2 3 Ar
5 2 29 1
6 3 4 Ar
7 3 30 1
8 4 5 Ar
9 4 7 1
10 5 6 Ar
11 5 9 1
12 6 8 1
13 9 10 1
14 9 15 1
15 9 16 1
16 10 11 1
17 10 17 1
18 10 18 1
19 11 12 1
20 11 19 1
21 11 20 1
22 12 13 1
23 12 21 1
24 12 22 1
25 13 14 1
26 13 23 1
27 13 24 1
28 14 25 1
29 14 26 1
30 14 27 1

#  Title
# Created by Agui 10.1.7
#

#
#

@<TRIPOS>MOLECULE
24_a_1-4rf6phi
30 30
SMALL
NO_CHARGES


@<TRIPOS>ATOM
1 C1    -3.7116    -0.0081     1.2429 C
2 C2    -4.3712    -0.0001     0.0151 C
3 C3    -3.7349     0.4667    -1.1341 C
4 C4    -2.4236     0.9258    -1.0521 C
5 C5    -1.7558     0.9249     0.1736 C
6 C6    -2.4006     0.4538     1.3187 C
7 H7    -1.9291     1.2939    -1.9418 H
8 H8    -1.8888     0.4569     2.2725 H
9 C9    -0.3333     1.4157     0.2618 C
10 C10     0.7268     0.2759     0.0621 C
11 C11     2.2171     0.7486    -0.0933 C
12 C12     3.2689    -0.3998     0.1321 C
13 C13     4.6944    -0.0705    -0.4370 C
14 C14     5.8395    -0.9889     0.1094 C
15 F15     0.3967    -0.4182    -1.0526 F
16 F16     0.6417    -0.5604     1.1271 F
17 F17     2.3795     1.2411    -1.3420 F
18 F18     2.4758     1.7291     0.7960 F
19 F19     2.8331    -1.5294    -0.4669 F
20 F20     3.3763    -0.6281     1.4597 F
21 F21     4.6700    -0.2071    -1.7781 F
22 F22     5.0209     1.2047    -0.1323 F
23 F23     6.0893    -0.7322     1.3950 F
24 F24     5.5152    -2.2800    -0.0236 F
25 H25    -4.2092    -0.3663     2.1346 H
26 I26    -6.3643    -0.6993    -0.1051 I
27 H27    -4.2508     0.4759    -2.0853 H
28 F28    -0.0854     2.3645    -0.6907 F
29 F29    -0.0985     1.9830     1.4798 F
30 F30     6.9515    -0.7517    -0.5946 F
@<TRIPOS>BOND
1 1 2 Ar
2 1 6 Ar
3 1 25 1
4 2 3 Ar
5 2 26 1
6 3 4 Ar
7 3 27 1
8 4 5 Ar
9 4 7 1
10 5 6 Ar
11 5 9 1
12 6 8 1
13 9 10 1
14 9 28 1
15 9 29 1
16 10 11 1
17 10 15 1
18 10 16 1
19 11 12 1
20 11 17 1
21 11 18 1
22 12 13 1
23 12 19 1
24 12 20 1
25 13 14 1
26 13 21 1
27 13 22 1
28 14 23 1
29 14 24 1
30 14 30 1

#  Title
# Created by Agui 10.1.7
#

#
#

@<TRIPOS>MOLECULE
24_b_1-4rf6phicl2
32 30
SMALL
NO_CHARGES


@<TRIPOS>ATOM
1 C1    -2.9396    -0.2327    -1.2483 C
2 C2    -3.5779    -0.1294    -0.0197 C
3 C3    -2.9633    -0.4599     1.1809 C
4 C4    -1.6470    -0.9112     1.1439 C
5 C5    -0.9824    -1.0276    -0.0778 C
6 C6    -1.6234    -0.6864    -1.2699 C
7 H7    -1.1480    -1.1809     2.0654 H
8 H8    -1.1072    -0.7847    -2.2158 H
9 C9     0.4484    -1.5155    -0.1134 C
10 C10     1.4930    -0.3469    -0.0382 C
11 C11     2.9876    -0.7846     0.1686 C
12 C12     4.0270     0.3451    -0.1768 C
13 C13     5.4544     0.0937     0.4260 C
14 C14     6.5908     0.9619    -0.2130 C
15 F15     1.1484     0.4575     0.9944 F
16 F16     1.3962     0.3658    -1.1878 F
17 F17     3.1493    -1.1405     1.4624 F
18 F18     3.2548    -1.8517    -0.6117 F
19 F19     3.5749     1.5257     0.2984 F
20 F20     4.1329     0.4313    -1.5209 F
21 F21     5.4238     0.3705     1.7450 F
22 F22     5.7937    -1.2033     0.2580 F
23 F23     6.8456     0.5729    -1.4639 F
24 F24     6.2509     2.2556    -0.2179 F
25 H25    -3.4421     0.0278    -2.1702 H
26 I26    -5.5882     0.5586     0.0250 I
27 Cl27    -6.3690    -1.8409    -0.0969 Cl
28 Cl28    -4.7317     2.9316     0.1448 Cl
29 H29    -3.4848    -0.3753     2.1248 H
30 F30     0.6967    -2.3524     0.9354 F
31 F31     0.6813    -2.2081    -1.2622 F
32 F32     7.7030     0.8129     0.5135 F
@<TRIPOS>BOND
1 1 2 Ar
2 1 6 Ar
3 1 25 1
4 2 3 Ar
5 2 26 1
6 3 4 Ar
7 3 29 1
8 4 5 Ar
9 4 7 1
10 5 6 Ar
11 5 9 1
12 6 8 1
13 9 10 1
14 9 30 1
15 9 31 1
16 10 11 1
17 10 15 1
18 10 16 1
19 11 12 1
20 11 17 1
21 11 18 1
22 12 13 1
23 12 19 1
24 12 20 1
25 13 14 1
26 13 21 1
27 13 22 1
28 14 23 1
29 14 24 1
30 14 32 1

#  Title
# Created by Agui 10.1.7
#

#
#

@<TRIPOS>MOLECULE
25_a_1-3-5-(rf6)2C6H3i
48 48
SMALL
NO_CHARGES


@<TRIPOS>ATOM
1 C1     1.8358     0.9993    -1.2016 C
2 C2     3.0150     0.2527    -1.2103 C
3 C3     3.5983    -0.1120     0.0000 C
4 C4     3.0150     0.2527     1.2103 C
5 C5     1.8358     0.9993     1.2016 C
6 C6     1.2375     1.3731     0.0000 C
7 H7     3.4732    -0.0261     2.1492 H
8 H8     0.3335     1.9657     0.0000 H
9 H9     3.4732    -0.0261    -2.1492 H
10 C10     1.1920     1.3979     2.5104 C
11 C11     1.1920     1.3979    -2.5104 C
12 C12     0.1301     0.3557     3.0089 C
13 C13     0.1301     0.3557    -3.0089 C
14 C14    -0.4042     0.5761     4.4696 C
15 C15    -0.4042     0.5761    -4.4696 C
16 C16    -1.7355    -0.2043     4.7764 C
17 C17    -1.7355    -0.2043    -4.7764 C
18 C18    -2.0394    -0.3541     6.3092 C
19 C19    -2.0394    -0.3541    -6.3092 C
20 C20    -3.5157    -0.7586    -6.6416 C
21 C21    -3.5157    -0.7586     6.6416 C
22 F22     0.6923    -0.8749     2.9533 F
23 F23    -0.9153     0.3882     2.1463 F
24 F24    -0.9153     0.3882    -2.1463 F
25 F25     0.6923    -0.8749    -2.9533 F
26 F26     0.5480     0.1639     5.3358 F
27 F27     0.5480     0.1639    -5.3358 F
28 F28    -0.6339     1.8899     4.6701 F
29 F29    -0.6339     1.8899    -4.6701 F
30 F30    -1.6579    -1.4430     4.2435 F
31 F31    -1.6579    -1.4430    -4.2435 F
32 F32    -2.7609     0.4544     4.1937 F
33 F33    -2.7609     0.4544    -4.1937 F
34 F34    -1.2323    -1.3048     6.8214 F
35 F35    -1.2323    -1.3048    -6.8214 F
36 F36    -1.7903     0.8167     6.9359 F
37 F37    -1.7903     0.8167    -6.9359 F
38 F38    -4.3579     0.2434     6.3818 F
39 F39    -4.3579     0.2434    -6.3818 F
40 F40    -3.8821    -1.8328     5.9337 F
41 F41    -3.8821    -1.8328    -5.9337 F
42 F42     0.5655     2.5995     2.3807 F
43 F43     2.1326     1.5219     3.4915 F
44 F44     0.5655     2.5995    -2.3807 F
45 F45     2.1326     1.5219    -3.4915 F
46 F46    -3.5956    -1.0544    -7.9429 F
47 F47    -3.5956    -1.0544     7.9429 F
48 I48     5.3952    -1.2242     0.0000 I
@<TRIPOS>BOND
1 1 2 Ar
2 1 6 Ar
3 1 11 1
4 2 3 Ar
5 2 9 1
6 3 4 Ar
7 3 48 1
8 4 5 Ar
9 4 7 1
10 5 6 Ar
11 5 10 1
12 6 8 1
13 10 12 1
14 10 42 1
15 10 43 1
16 11 13 1
17 11 44 1
18 11 45 1
19 12 14 1
20 12 22 1
21 12 23 1
22 13 15 1
23 13 24 1
24 13 25 1
25 14 16 1
26 14 26 1
27 14 28 1
28 15 17 1
29 15 27 1
30 15 29 1
31 16 18 1
32 16 30 1
33 16 32 1
34 17 19 1
35 17 31 1
36 17 33 1
37 18 21 1
38 18 34 1
39 18 36 1
40 19 20 1
41 19 35 1
42 19 37 1
43 20 39 1
44 20 41 1
45 20 46 1
46 21 38 1
47 21 40 1
48 21 47 1

#  Title
# Created by Agui 10.1.7
#

#
#

@<TRIPOS>MOLECULE
25_b_1-3-5-(rf6)2C6H3i_cl2
50 48
SMALL
NO_CHARGES


@<TRIPOS>ATOM
1 C1     1.4002    -1.1198     1.2060 C
2 C2     2.6017    -0.4107     1.2183 C
3 C3     3.1745    -0.0767     0.0000 C
4 C4     2.6017    -0.4107    -1.2183 C
5 C5     1.4002    -1.1198    -1.2060 C
6 C6     0.7968    -1.4722     0.0000 C
7 H7     3.0716    -0.1456    -2.1553 H
8 H8    -0.1250    -2.0374     0.0000 H
9 H9     3.0716    -0.1456     2.1553 H
10 C10     0.7424    -1.5045    -2.5146 C
11 C11     0.7424    -1.5045     2.5146 C
12 C12    -0.2964    -0.4357    -3.0046 C
13 C13    -0.2964    -0.4357     3.0046 C
14 C14    -0.8473    -0.6440    -4.4608 C
15 C15    -0.8473    -0.6440     4.4608 C
16 C16    -2.1591     0.1723    -4.7581 C
17 C17    -2.1591     0.1723     4.7581 C
18 C18    -2.4706     0.3278    -6.2886 C
19 C19    -2.4706     0.3278     6.2886 C
20 C20    -3.9376     0.7728     6.6102 C
21 C21    -3.9376     0.7728    -6.6102 C
22 F22     0.3008     0.7774    -2.9510 F
23 F23    -1.3329    -0.4434    -2.1308 F
24 F24    -1.3329    -0.4434     2.1308 F
25 F25     0.3008     0.7774     2.9510 F
26 F26     0.1109    -0.2604    -5.3327 F
27 F27     0.1109    -0.2604     5.3327 F
28 F28    -1.1128    -1.9520    -4.6542 F
29 F29    -1.1128    -1.9520     4.6542 F
30 F30    -2.0416     1.4081    -4.2266 F
31 F31    -2.0416     1.4081     4.2266 F
32 F32    -3.1962    -0.4580    -4.1650 F
33 F33    -3.1962    -0.4580     4.1650 F
34 F34    -1.6405     1.2539    -6.8083 F
35 F35    -1.6405     1.2539     6.8083 F
36 F36    -2.2587    -0.8513    -6.9135 F
37 F37    -2.2587    -0.8513     6.9135 F
38 F38    -4.8048    -0.2050    -6.3410 F
39 F39    -4.8048    -0.2050     6.3410 F
40 F40    -4.2675     1.8579    -5.9011 F
41 F41    -4.2675     1.8579     5.9011 F
42 F42     0.0939    -2.6916    -2.3776 F
43 F43     1.6801    -1.6471    -3.4935 F
44 F44     0.0939    -2.6916     2.3776 F
45 F45     1.6801    -1.6471     3.4935 F
46 F46    -4.0194     1.0681     7.9112 F
47 F47    -4.0194     1.0681    -7.9112 F
48 I48     5.0152     0.9810     0.0000 I
49 Cl49     3.7074     3.1363     0.0000 Cl
50 Cl50     6.2188    -1.2357     0.0000 Cl
@<TRIPOS>BOND
1 1 2 Ar
2 1 6 Ar
3 1 11 1
4 2 3 Ar
5 2 9 1
6 3 4 Ar
7 3 48 1
8 4 5 Ar
9 4 7 1
10 5 6 Ar
11 5 10 1
12 6 8 1
13 10 12 1
14 10 42 1
15 10 43 1
16 11 13 1
17 11 44 1
18 11 45 1
19 12 14 1
20 12 22 1
21 12 23 1
22 13 15 1
23 13 24 1
24 13 25 1
25 14 16 1
26 14 26 1
27 14 28 1
28 15 17 1
29 15 27 1
30 15 29 1
31 16 18 1
32 16 30 1
33 16 32 1
34 17 19 1
35 17 31 1
36 17 33 1
37 18 21 1
38 18 34 1
39 18 36 1
40 19 20 1
41 19 35 1
42 19 37 1
43 20 39 1
44 20 41 1
45 20 46 1
46 21 38 1
47 21 40 1
48 21 47 1

#  Title
# Created by Agui 10.1.7
#

#
#

@<TRIPOS>MOLECULE
26_a_1-2-4-(rf6CH2CH2)2C6H3
60 60
SMALL
NO_CHARGES


@<TRIPOS>ATOM
1 C1    -1.1152     3.2967     0.7120 C
2 C2    -1.1514     4.3104    -0.2551 C
3 C3     0.0214     4.8969    -0.7298 C
4 C4     1.2557     4.4735    -0.2481 C
5 C5     1.3363     3.4635     0.7137 C
6 C6     0.1469     2.8980     1.1744 C
7 C7     2.6750     2.9810     1.2275 C
8 C8     3.2299     1.8304     0.3628 C
9 C9     4.5700     1.3265     0.8680 C
10 C10    -3.9619     0.6767     0.9659 C
11 C11     5.1747     0.1962    -0.0259 C
12 C12    -4.4711    -0.4800     0.0467 C
13 C13     6.4302    -0.5434     0.5594 C
14 C14    -5.5100    -1.4635     0.6946 C
15 C15    -6.2988    -2.3295    -0.3558 C
16 C16     7.2434    -1.3541    -0.5164 C
17 F17     5.4748     2.3492     0.9180 F
18 F18    -5.0088     1.5218     1.1951 F
19 F19     4.4522     0.8332     2.1402 F
20 F20    -3.6200     0.1261     2.1743 F
21 F21     5.5057     0.7471    -1.2221 F
22 F22    -5.0258     0.0809    -1.0577 F
23 F23     4.2098    -0.7327    -0.2427 F
24 F24    -3.3977    -1.2119    -0.3463 F
25 F25     7.2627     0.3587     1.1181 F
26 F26    -6.4086    -0.7593     1.4125 F
27 F27     6.0102    -1.3993     1.5175 F
28 F28    -4.8454    -2.2964     1.5267 F
29 F29     6.3823    -1.9911    -1.3398 F
30 F30    -5.4472    -2.7515    -1.3161 F
31 F31     7.9751    -0.4834    -1.2458 F
32 F32    -7.2451    -1.5531    -0.9277 F
33 H33     0.1913     2.1237     1.9357 H
34 H34    -0.0269     5.6870    -1.4681 H
35 C35    -6.9935    -3.5938     0.2633 C
36 C36    -8.0931    -4.2405    -0.6455 C
37 C37     8.2078    -2.4284     0.0999 C
38 C38     9.3021    -2.9604    -0.8865 C
39 C39    -2.7867     1.4318     0.3720 C
40 C40    -2.3450     2.6102     1.2637 C
41 H41    -3.1665     3.3220     1.3577 H
42 H42    -2.1224     2.2373     2.2656 H
43 H43     2.5747     2.6384     2.2600 H
44 H44     3.3896     3.8069     1.2312 H
45 H45     3.3620     2.1593    -0.6710 H
46 H46     2.5336     0.9899     0.3534 H
47 H47    -1.9656     0.7249     0.2401 H
48 H48    -3.0804     1.7905    -0.6172 H
49 F49    -6.0566    -4.5344     0.4981 F
50 F50    -7.5823    -3.2603     1.4329 F
51 F51    -9.1711    -3.4579    -0.7265 F
52 F52    -8.4574    -5.4106    -0.1104 F
53 F53    -7.6196    -4.4612    -1.8772 F
54 F54     8.7479    -3.3619    -2.0360 F
55 F55     7.4780    -3.4868     0.5057 F
56 F56     8.8484    -1.9026     1.1672 F
57 F57     9.9185    -4.0032    -0.3204 F
58 F58    10.2125    -2.0198    -1.1465 F
59 I59    -2.9883     5.0402    -1.0463 I
60 H60     2.1595     4.9463    -0.6189 H
@<TRIPOS>BOND
1 1 2 Ar
2 1 6 Ar
3 1 40 1
4 2 3 Ar
5 2 59 1
6 3 4 Ar
7 3 34 1
8 4 5 Ar
9 4 60 1
10 5 6 Ar
11 5 7 1
12 6 33 1
13 7 8 1
14 7 43 1
15 7 44 1
16 8 9 1
17 8 45 1
18 8 46 1
19 9 11 1
20 9 17 1
21 9 19 1
22 10 12 1
23 10 18 1
24 10 20 1
25 10 39 1
26 11 13 1
27 11 21 1
28 11 23 1
29 12 14 1
30 12 22 1
31 12 24 1
32 13 16 1
33 13 25 1
34 13 27 1
35 14 15 1
36 14 26 1
37 14 28 1
38 15 30 1
39 15 32 1
40 15 35 1
41 16 29 1
42 16 31 1
43 16 37 1
44 35 36 1
45 35 49 1
46 35 50 1
47 36 51 1
48 36 52 1
49 36 53 1
50 37 38 1
51 37 55 1
52 37 56 1
53 38 54 1
54 38 57 1
55 38 58 1
56 39 40 1
57 39 47 1
58 39 48 1
59 40 41 1
60 40 42 1

#  Title
# Created by Agui 10.1.7
#

#
#

@<TRIPOS>MOLECULE
26_b_1-2-4-(rf6CH2CH2)2C6H3_cl2
62 60
SMALL
NO_CHARGES


@<TRIPOS>ATOM
1 C1     1.0648     2.8970    -0.8245 C
2 C2     1.1023     3.9442     0.1007 C
3 C3    -0.0357     4.6043     0.5519 C
4 C4    -1.2774     4.2055     0.0716 C
5 C5    -1.3790     3.1610    -0.8519 C
6 C6    -0.2086     2.5322    -1.2815 C
7 C7    -2.7284     2.7079    -1.3621 C
8 C8    -3.3354     1.6187    -0.4537 C
9 C9    -4.6880     1.1464    -0.9584 C
10 C10     3.7769     0.1366    -1.0099 C
11 C11    -5.3493     0.0823    -0.0244 C
12 C12     4.1674    -1.0872    -0.1201 C
13 C13    -6.6247    -0.6331    -0.5969 C
14 C14     5.1914    -2.0939    -0.7562 C
15 C15     5.8675    -3.0516     0.2930 C
16 C16    -7.4844    -1.3625     0.5005 C
17 F17    -5.5473     2.2022    -1.0684 F
18 F18     4.8754     0.9376    -1.1329 F
19 F19    -4.5691     0.5937    -2.2053 F
20 F20     3.4825    -0.3350    -2.2628 F
21 F21    -5.6739     0.7006     1.1398 F
22 F22     4.6799    -0.6094     1.0399 F
23 F23    -4.4238    -0.8714     0.2483 F
24 F24     3.0335    -1.7755     0.1686 F
25 F25    -7.4112     0.2763    -1.2079 F
26 F26     6.1670    -1.4046    -1.3824 F
27 F27    -6.2243    -1.5455    -1.5099 F
28 F28     4.5366    -2.8467    -1.6684 F
29 F29    -6.6600    -1.9947     1.3641 F
30 F30     4.9365    -3.4719     1.1771 F
31 F31    -8.1904    -0.4317     1.1790 F
32 F32     6.8148    -2.3565     0.9593 F
33 H33    -0.2771     1.7327    -2.0136 H
34 H34     0.0380     5.4180     1.2614 H
35 C35     6.5328    -4.3204    -0.3488 C
36 C36     7.5385    -5.0705     0.5888 C
37 C37    -8.4819    -2.4247    -0.0834 C
38 C38    -9.6097    -2.8698     0.9082 C
39 C39     2.6074     0.9274    -0.4506 C
40 C40     2.2751     2.1483    -1.3348 C
41 H41     3.1399     2.8099    -1.3965 H
42 H42     2.0690     1.8094    -2.3519 H
43 H43    -2.6283     2.3167    -2.3769 H
44 H44    -3.4096     3.5599    -1.4108 H
45 H45    -3.4683     1.9973     0.5628 H
46 H46    -2.6731     0.7530    -0.3977 H
47 H47     1.7474     0.2586    -0.3870 H
48 H48     2.8582     1.2355     0.5673 H
49 F49     5.5644    -5.1951    -0.6881 F
50 F50     7.2095    -3.9624    -1.4622 F
51 F51     8.6480    -4.3528     0.7752 F
52 F52     7.8746    -6.2307     0.0152 F
53 F53     6.9778    -5.3256     1.7763 F
54 F54    -9.0871    -3.2411     2.0823 F
55 F55    -7.7883    -3.5269    -0.4317 F
56 F56    -9.0859    -1.9212    -1.1823 F
57 F57   -10.2587    -3.9117     0.3786 F
58 F58   -10.4854    -1.8837     1.1127 F
59 I59     2.9546     4.6372     0.8928 I
60 H60    -2.1679     4.7229     0.4118 H
61 Cl61     3.2448     6.1287    -1.1241 Cl
62 Cl62     2.6431     3.0937     2.8854 Cl
@<TRIPOS>BOND
1 1 2 Ar
2 1 6 Ar
3 1 40 1
4 2 3 Ar
5 2 59 1
6 3 4 Ar
7 3 34 1
8 4 5 Ar
9 4 60 1
10 5 6 Ar
11 5 7 1
12 6 33 1
13 7 8 1
14 7 43 1
15 7 44 1
16 8 9 1
17 8 45 1
18 8 46 1
19 9 11 1
20 9 17 1
21 9 19 1
22 10 12 1
23 10 18 1
24 10 20 1
25 10 39 1
26 11 13 1
27 11 21 1
28 11 23 1
29 12 14 1
30 12 22 1
31 12 24 1
32 13 16 1
33 13 25 1
34 13 27 1
35 14 15 1
36 14 26 1
37 14 28 1
38 15 30 1
39 15 32 1
40 15 35 1
41 16 29 1
42 16 31 1
43 16 37 1
44 35 36 1
45 35 49 1
46 35 50 1
47 36 51 1
48 36 52 1
49 36 53 1
50 37 38 1
51 37 55 1
52 37 56 1
53 38 54 1
54 38 57 1
55 38 58 1
56 39 40 1
57 39 47 1
58 39 48 1
59 40 41 1
60 40 42 1

#  Title
# Created by Agui 10.1.7
#

#
#

@<TRIPOS>MOLECULE
27_a_vii_n6
66 66
SMALL
NO_CHARGES


@<TRIPOS>ATOM
1 C1    -1.1063     3.7669     0.8482 C
2 C2    -1.1201     4.8274    -0.0674 C
3 C3     0.0634     5.4166    -0.5105 C
4 C4     1.2886     4.9483    -0.0473 C
5 C5     1.3496     3.8906     0.8638 C
6 C6     0.1481     3.3257     1.2931 C
7 H7     2.2016     5.4211    -0.3949 H
8 C8    -2.3498     3.0711     1.3531 C
9 C9    -2.8018     1.9200     0.4339 C
10 C10     4.5897     1.7285     0.9451 C
11 C11    -4.0805     1.2569     0.9636 C
12 C12     5.1604     0.6277     0.0700 C
13 C13    -4.5107     0.0686     0.1236 C
14 C14     6.5631     0.1306     0.5480 C
15 C15    -5.8529    -0.5698     0.6071 C
16 C16    -6.2330    -1.9463    -0.0464 C
17 C17     7.1070    -1.1662    -0.1509 C
18 F18     5.2904     1.0612    -1.2191 F
19 F19    -4.6720     0.4366    -1.1814 F
20 F20     4.3228    -0.4556     0.0465 F
21 F21    -3.5541    -0.9126     0.1484 F
22 F22     7.4498     1.1407     0.3526 F
23 F23    -6.8482     0.3216     0.3646 F
24 F24     6.4940    -0.1155     1.8809 F
25 F25    -5.7747    -0.7572     1.9492 F
26 F26     6.4544    -2.2320     0.3642 F
27 F27    -5.4703    -2.9099     0.5172 F
28 F28     6.8571    -1.1024    -1.4745 F
29 F29    -5.9720    -1.9044    -1.3688 F
30 C30     3.2409     2.2506     0.4315 C
31 C31     2.6776     3.3537     1.3482 C
32 H32     3.4008     4.1739     1.4123 H
33 H33     2.5637     2.9574     2.3629 H
34 H34    -2.1487     2.6744     2.3534 H
35 H35    -3.1632     3.7945     1.4575 H
36 H36    -2.0023     1.1778     0.3620 H
37 H37    -2.9762     2.3015    -0.5745 H
38 H38     3.3574     2.6425    -0.5821 H
39 H39     2.5250     1.4265     0.3709 H
40 H40     4.4884     1.3304     1.9574 H
41 H41     5.3257     2.5368     0.9831 H
42 H42    -3.9375     0.9042     1.9877 H
43 H43    -4.9064     1.9738     0.9752 H
44 C44    -7.7464    -2.3357     0.1370 C
45 C45    -8.0400    -3.8586    -0.1055 C
46 C46    -9.5524    -4.2011    -0.3259 C
47 C47     8.6534    -1.3850     0.0411 C
48 C48     9.1242    -2.8534    -0.2526 C
49 C49    10.6687    -3.0104    -0.4604 C
50 F50    -9.9835    -3.7399    -1.5016 F
51 F51   -10.3034    -3.6787     0.6505 F
52 F52    -7.6176    -4.5597     0.9661 F
53 F53    -7.3679    -4.2818    -1.1985 F
54 F54    -8.1366    -2.0327     1.3947 F
55 F55    -8.4847    -1.6100    -0.7312 F
56 F56     9.3115    -0.5459    -0.7886 F
57 F57     8.9918    -1.0868     1.3148 F
58 F58     8.7727    -3.6391     0.7852 F
59 F59     8.5187    -3.3081    -1.3715 F
60 F60    11.3420    -2.4427     0.5468 F
61 F61    11.0575    -2.4574    -1.6111 F
62 H62     0.0311     6.2421    -1.2099 H
63 I63    -2.9416     5.6283    -0.8297 I
64 H64     0.1767     2.5116     2.0124 H
65 F65    -9.6970    -5.5305    -0.3127 F
66 F66    10.9662    -4.3137    -0.4938 F
@<TRIPOS>BOND
1 1 2 Ar
2 1 6 Ar
3 1 8 1
4 2 3 Ar
5 2 63 1
6 3 4 Ar
7 3 62 1
8 4 5 Ar
9 4 7 1
10 5 6 Ar
11 5 31 1
12 6 64 1
13 8 9 1
14 8 34 1
15 8 35 1
16 9 11 1
17 9 36 1
18 9 37 1
19 10 12 1
20 10 30 1
21 10 40 1
22 10 41 1
23 11 13 1
24 11 42 1
25 11 43 1
26 12 14 1
27 12 18 1
28 12 20 1
29 13 15 1
30 13 19 1
31 13 21 1
32 14 17 1
33 14 22 1
34 14 24 1
35 15 16 1
36 15 23 1
37 15 25 1
38 16 27 1
39 16 29 1
40 16 44 1
41 17 26 1
42 17 28 1
43 17 47 1
44 30 31 1
45 30 38 1
46 30 39 1
47 31 32 1
48 31 33 1
49 44 45 1
50 44 54 1
51 44 55 1
52 45 46 1
53 45 52 1
54 45 53 1
55 46 50 1
56 46 51 1
57 46 65 1
58 47 48 1
59 47 56 1
60 47 57 1
61 48 49 1
62 48 58 1
63 48 59 1
64 49 60 1
65 49 61 1
66 49 66 1

#  Title
# Created by Agui 10.1.7
#

#
#

@<TRIPOS>MOLECULE
27_b_vii_cl2_n6
68 66
SMALL
NO_CHARGES


@<TRIPOS>ATOM
1 C1     1.0529     3.3616    -0.9369 C
2 C2     1.0537     4.4481    -0.0579 C
3 C3    -0.1042     5.0941     0.3619 C
4 C4    -1.3313     4.6389    -0.1050 C
5 C5    -1.3992     3.5539    -0.9845 C
6 C6    -0.2083     2.9430    -1.3824 C
7 H7    -2.2379     5.1427     0.2122 H
8 C8     2.2871     2.6250    -1.4043 C
9 C9     2.6736     1.4564    -0.4757 C
10 C10    -4.6928     1.4797    -1.0381 C
11 C11     3.9203     0.7307    -0.9999 C
12 C12    -5.3051     0.4300    -0.1278 C
13 C13     4.2765    -0.4858    -0.1639 C
14 C14    -6.7132    -0.0489    -0.6079 C
15 C15     5.5832    -1.1954    -0.6452 C
16 C16     5.8819    -2.5945     0.0024 C
17 C17    -7.3023    -1.3008     0.1350 C
18 F18    -5.4406     0.9203     1.1398 F
19 F19     4.4479    -0.1346     1.1426 F
20 F20    -4.4956    -0.6713    -0.0486 F
21 F21     3.2644    -1.4091    -0.2040 F
22 F22    -7.5739     0.9923    -0.4688 F
23 F23     6.6245    -0.3616    -0.3933 F
24 F24    -6.6292    -0.3510    -1.9284 F
25 F25     5.4999    -1.3699    -1.9889 F
26 F26    -6.6701    -2.4032    -0.3251 F
27 F27     5.0676    -3.5097    -0.5697 F
28 F28    -7.0703    -1.1874     1.4584 F
29 F29     5.6174    -2.5438     1.3235 F
30 C30    -3.3385     1.9846    -0.5223 C
31 C31    -2.7326     3.0359    -1.4728 C
32 H32    -3.4302     3.8731    -1.5795 H
33 H33    -2.6115     2.5986    -2.4690 H
34 H34     2.0931     2.2374    -2.4090 H
35 H35     3.1258     3.3184    -1.5046 H
36 H36     1.8384     0.7540    -0.4105 H
37 H37     2.8550     1.8235     0.5371 H
38 H38    -3.4599     2.4182     0.4735 H
39 H39    -2.6468     1.1444    -0.4185 H
40 H40    -4.5873     1.0388    -2.0319 H
41 H41    -5.4060     2.3050    -1.1193 H
42 H42     3.7672     0.3933    -2.0276 H
43 H43     4.7846     1.4007    -1.0001 H
44 C44     7.3715    -3.0679    -0.1774 C
45 C45     7.5773    -4.6062     0.0589 C
46 C46     9.0671    -5.0347     0.2827 C
47 C47    -8.8509    -1.4864    -0.0733 C
48 C48    -9.3658    -2.9280     0.2739 C
49 C49   -10.9172    -3.0352     0.4617 C
50 F50     9.5192    -4.6038     1.4619 F
51 F51     9.8496    -4.5513    -0.6889 F
52 F52     7.1196    -5.2770    -1.0175 F
53 F53     6.8780    -4.9952     1.1474 F
54 F54     7.7824    -2.7814    -1.4325 F
55 F55     8.1459    -2.3887     0.6966 F
56 F56    -9.4981    -0.5953     0.7092 F
57 F57    -9.1605    -1.2332    -1.3640 F
58 F58    -9.0189    -3.7659    -0.7238 F
59 F59    -8.7903    -3.3501     1.4210 F
60 F60   -11.5582    -2.4936    -0.5803 F
61 F61   -11.3089    -2.4228     1.5808 F
62 H62    -0.0572     5.9365     1.0393 H
63 I63     2.8816     5.2254     0.7160 I
64 H64    -0.2502     2.1089    -2.0770 H
65 Cl65     3.3002     6.4219    -1.4816 Cl
66 Cl66     2.4766     4.0037     2.8948 Cl
67 F67     9.1361    -6.3701     0.2637 F
68 F68   -11.2503    -4.3273     0.5454 F
@<TRIPOS>BOND
1 1 2 Ar
2 1 6 Ar
3 1 8 1
4 2 3 Ar
5 2 63 1
6 3 4 Ar
7 3 62 1
8 4 5 Ar
9 4 7 1
10 5 6 Ar
11 5 31 1
12 6 64 1
13 8 9 1
14 8 34 1
15 8 35 1
16 9 11 1
17 9 36 1
18 9 37 1
19 10 12 1
20 10 30 1
21 10 40 1
22 10 41 1
23 11 13 1
24 11 42 1
25 11 43 1
26 12 14 1
27 12 18 1
28 12 20 1
29 13 15 1
30 13 19 1
31 13 21 1
32 14 17 1
33 14 22 1
34 14 24 1
35 15 16 1
36 15 23 1
37 15 25 1
38 16 27 1
39 16 29 1
40 16 44 1
41 17 26 1
42 17 28 1
43 17 47 1
44 30 31 1
45 30 38 1
46 30 39 1
47 31 32 1
48 31 33 1
49 44 45 1
50 44 54 1
51 44 55 1
52 45 46 1
53 45 52 1
54 45 53 1
55 46 50 1
56 46 51 1
57 46 67 1
58 47 48 1
59 47 56 1
60 47 57 1
61 48 49 1
62 48 58 1
63 48 59 1
64 49 60 1
65 49 61 1
66 49 68 1

#  Title
# Created by Agui 10.1.7
#

#
#

@<TRIPOS>MOLECULE
28_a_viii_rf6
66 66
SMALL
NO_CHARGES


@<TRIPOS>ATOM
1 C1     3.1916    -3.5461     0.9997 C
2 C2     3.3955    -2.1319     1.5097 C
3 C3     2.9518    -1.0442     0.5134 C
4 C4    -1.6009    -2.5951     1.1151 C
5 C5     3.2329     0.3624     1.0602 C
6 C6    -2.6561    -2.2919     0.0668 C
7 C7     2.7328     1.4565     0.1347 C
8 C8    -3.9571    -1.6701     0.6699 C
9 C9     3.0736     2.8939     0.6445 C
10 C10     2.3785     4.0762    -0.1203 C
11 C11    -4.9945    -1.1089    -0.3669 C
12 F12    -3.0095    -3.4340    -0.5958 F
13 F13     3.2763     1.3154    -1.1099 F
14 F14    -2.1734    -1.4180    -0.8692 F
15 F15     1.3721     1.3798    -0.0097 F
16 F16    -4.5614    -2.6246     1.4245 F
17 F17     4.4203     3.0515     0.5697 F
18 F18    -3.5985    -0.6508     1.4907 F
19 F19     2.7129     2.9762     1.9506 F
20 F20    -4.5352     0.0748    -0.8295 F
21 F21     1.0897     4.1425     0.2818 F
22 F22    -5.1043    -1.9667    -1.4019 F
23 F23     2.4079     3.8324    -1.4462 F
24 C24    -0.3443    -3.2406     0.5151 C
25 C25     0.6883    -3.5844     1.6072 C
26 H26     0.2286    -4.2816     2.3175 H
27 H27     0.9223    -2.6827     2.1775 H
28 H28     2.8706    -1.9902     2.4599 H
29 H29     4.4585    -1.9949     1.7310 H
30 H30     1.8851    -1.1453     0.3004 H
31 H31     3.4757    -1.1847    -0.4352 H
32 H32    -0.6201    -4.1487    -0.0259 H
33 H33     0.1019    -2.5645    -0.2186 H
34 H34    -1.3510    -1.6582     1.6182 H
35 H35    -2.0552    -3.2561     1.8588 H
36 H36     2.7507     0.5029     2.0305 H
37 H37     4.3067     0.5115     1.2043 H
38 C38     3.0545     5.4745     0.1317 C
39 C39     2.1420     6.6940    -0.2481 C
40 C40     2.9040     8.0551    -0.3905 C
41 C41    -6.4314    -0.8884     0.2350 C
42 C42    -7.3381     0.0596    -0.6272 C
43 C43    -8.8650    -0.0164    -0.2863 C
44 F44     3.6807     8.0597    -1.4757 F
45 F45     3.6593     8.2897     0.6887 F
46 F46     1.2056     6.8516     0.7091 F
47 F47     1.5277     6.4507    -1.4265 F
48 F48     3.3748     5.5860     1.4397 F
49 F49     4.1896     5.5397    -0.5982 F
50 F50    -7.0407    -2.0899     0.3416 F
51 F51    -6.3209    -0.3492     1.4689 F
52 F52    -6.9426     1.3339    -0.4349 F
53 F53    -7.2017    -0.2494    -1.9354 F
54 F54    -9.0645     0.1314     1.0284 F
55 F55    -9.3878    -1.1801    -0.6783 F
56 C56     1.9524    -4.2140     1.0537 C
57 C57     4.2996    -4.2081     0.4507 C
58 C58     1.8785    -5.5258     0.5688 C
59 H59     0.9335    -6.0575     0.6248 H
60 C60     4.1920    -5.5047    -0.0370 C
61 C61     2.9768    -6.1801     0.0219 C
62 H62     2.8838    -7.1951    -0.3424 H
63 F63     2.0058     9.0388    -0.5069 F
64 F64    -9.4973     0.9710    -0.9292 F
65 I65     5.8952    -6.4651    -0.8559 I
66 H66     5.2546    -3.6971     0.4166 H
@<TRIPOS>BOND
1 1 2 1
2 1 56 Ar
3 1 57 Ar
4 2 3 1
5 2 28 1
6 2 29 1
7 3 5 1
8 3 30 1
9 3 31 1
10 4 6 1
11 4 24 1
12 4 34 1
13 4 35 1
14 5 7 1
15 5 36 1
16 5 37 1
17 6 8 1
18 6 12 1
19 6 14 1
20 7 9 1
21 7 13 1
22 7 15 1
23 8 11 1
24 8 16 1
25 8 18 1
26 9 10 1
27 9 17 1
28 9 19 1
29 10 21 1
30 10 23 1
31 10 38 1
32 11 20 1
33 11 22 1
34 11 41 1
35 24 25 1
36 24 32 1
37 24 33 1
38 25 26 1
39 25 27 1
40 25 56 1
41 38 39 1
42 38 48 1
43 38 49 1
44 39 40 1
45 39 46 1
46 39 47 1
47 40 44 1
48 40 45 1
49 40 63 1
50 41 42 1
51 41 50 1
52 41 51 1
53 42 43 1
54 42 52 1
55 42 53 1
56 43 54 1
57 43 55 1
58 43 64 1
59 56 58 Ar
60 57 60 Ar
61 57 66 1
62 58 59 1
63 58 61 Ar
64 60 61 Ar
65 60 65 1
66 61 62 1

#  Title
# Created by Agui 10.1.7
#

#
#

@<TRIPOS>MOLECULE
28_b_viii_rf6_cl2
68 66
SMALL
NO_CHARGES


@<TRIPOS>ATOM
1 C1    -4.0737    -0.8973    -1.1027 C
2 C2    -3.4210     0.3802    -1.5948 C
3 C3    -2.4310     0.9952    -0.5877 C
4 C4     0.3935    -2.8639    -1.1708 C
5 C5    -1.8361     2.3061    -1.1204 C
6 C6     1.4141    -3.2431    -0.1122 C
7 C7    -0.7775     2.8779    -0.1941 C
8 C8     2.8489    -3.4532    -0.6951 C
9 C9    -0.2084     4.2474    -0.6867 C
10 C10     1.0584     4.7776     0.0749 C
11 C11     4.0018    -3.6102     0.3595 C
12 F12     1.0421    -4.4014     0.5102 F
13 F13    -1.2879     3.0614     1.0579 F
14 F14     1.4929    -2.2759     0.8520 F
15 F15     0.2755     2.0084    -0.0766 F
16 F16     2.8171    -4.5595    -1.4825 F
17 F17    -1.2016     5.1675    -0.5872 F
18 F18     3.1460    -2.3872    -1.4803 F
19 F19     0.1178     4.1210    -1.9984 F
20 F20     4.2858    -2.3889     0.8625 F
21 F21     2.1324     4.0749    -0.3489 F
22 F22     3.5847    -4.4079     1.3639 F
23 F23     0.9021     4.5762     1.3988 F
24 C24    -1.0164    -2.6937    -0.5893 C
25 C25    -2.0410    -2.3606    -1.6928 C
26 H26    -2.0586    -3.1822    -2.4178 H
27 H27    -1.7065    -1.4781    -2.2415 H
28 H28    -2.9109     0.2009    -2.5465 H
29 H29    -4.2080     1.1093    -1.8097 H
30 H30    -1.6242     0.2891    -0.3785 H
31 H31    -2.9413     1.1776     0.3612 H
32 H32    -1.3154    -3.6101    -0.0754 H
33 H33    -1.0105    -1.9021     0.1642 H
34 H34     0.7303    -1.9388    -1.6440 H
35 H35     0.4037    -3.6467    -1.9346 H
36 H36    -1.3726     2.1514    -2.0976 H
37 H37    -2.6167     3.0618    -1.2445 H
38 C38     1.3373     6.3089    -0.1554 C
39 C39     2.7979     6.7469     0.2174 C
40 C40     2.9900     8.2927     0.3815 C
41 C41     5.3207    -4.2278    -0.2361 C
42 C42     6.5890    -3.9878     0.6572 C
43 C43     7.8091    -4.9075     0.3122 C
44 F44     2.3753     8.7392     1.4785 F
45 F45     2.5106     8.9444    -0.6842 F
46 F46     3.6369     6.3343    -0.7541 F
47 F47     3.1597     6.1691     1.3837 F
48 F48     1.1320     6.6080    -1.4571 F
49 F49     0.4671     7.0201     0.5941 F
50 F50     5.1414    -5.5588    -0.3846 F
51 F51     5.5579    -3.6856    -1.4507 F
52 F52     6.9897    -2.7092     0.5091 F
53 F53     6.2763    -4.2022     1.9540 F
54 F54     8.0813    -4.8608    -0.9970 F
55 F55     7.5709    -6.1730     0.6630 F
56 C56    -3.4443    -2.1584    -1.1557 C
57 C57    -5.3678    -0.8080    -0.5726 C
58 C58    -4.1360    -3.2852    -0.6911 C
59 H59    -3.6618    -4.2594    -0.7500 H
60 C60    -6.0059    -1.9477    -0.1105 C
61 C61    -5.4175    -3.2029    -0.1601 C
62 H62    -5.9305    -4.0887     0.1901 H
63 F63     4.2969     8.5527     0.4908 F
64 F64     8.8777    -4.4732     0.9881 F
65 I65    -7.9644    -1.7643     0.6809 I
66 Cl66    -8.9278    -2.2799    -1.6050 Cl
67 Cl67    -6.9855    -1.2431     2.9567 Cl
68 H68    -5.8632     0.1543    -0.5337 H
@<TRIPOS>BOND
1 1 2 1
2 1 56 Ar
3 1 57 Ar
4 2 3 1
5 2 28 1
6 2 29 1
7 3 5 1
8 3 30 1
9 3 31 1
10 4 6 1
11 4 24 1
12 4 34 1
13 4 35 1
14 5 7 1
15 5 36 1
16 5 37 1
17 6 8 1
18 6 12 1
19 6 14 1
20 7 9 1
21 7 13 1
22 7 15 1
23 8 11 1
24 8 16 1
25 8 18 1
26 9 10 1
27 9 17 1
28 9 19 1
29 10 21 1
30 10 23 1
31 10 38 1
32 11 20 1
33 11 22 1
34 11 41 1
35 24 25 1
36 24 32 1
37 24 33 1
38 25 26 1
39 25 27 1
40 25 56 1
41 38 39 1
42 38 48 1
43 38 49 1
44 39 40 1
45 39 46 1
46 39 47 1
47 40 44 1
48 40 45 1
49 40 63 1
50 41 42 1
51 41 50 1
52 41 51 1
53 42 43 1
54 42 52 1
55 42 53 1
56 43 54 1
57 43 55 1
58 43 64 1
59 56 58 Ar
60 57 60 2
61 57 68 1
62 58 59 1
63 58 61 Ar
64 60 61 Ar
65 60 65 1
66 61 62 1

#  Title
# Created by Agui 10.1.7
#

#
#

@<TRIPOS>MOLECULE
29_a_ix_n6
93 93
SMALL
NO_CHARGES


@<TRIPOS>ATOM
1 C1    -1.3269    -0.5663     3.3106 C
2 C2    -1.1282     0.8171     3.3855 C
3 C3     0.1417     1.3895     3.4223 C
4 C4     1.2423     0.5356     3.3886 C
5 C5     1.1118    -0.8559     3.3137 C
6 C6    -0.1878    -1.3871     3.2720 C
7 H7     2.2431     0.9559     3.4339 H
8 H8    -2.0027     1.4602     3.4284 H
9 C9    -2.7488    -1.0812     3.2557 C
10 C10    -3.2631    -1.2604     1.8143 C
11 C11     4.1026    -2.8472     1.8099 C
12 C12    -4.6981    -1.8043     1.8022 C
13 C13     4.6126    -3.1146     0.4057 C
14 C14    -5.2534    -1.9504     0.3973 C
15 C15     5.9329    -3.9508     0.3828 C
16 C16    -6.7320    -2.4565     0.3729 C
17 C17    -7.2941    -2.8663    -1.0351 C
18 C18     6.3888    -4.4754    -1.0254 C
19 F19     4.8563    -1.9373    -0.2449 F
20 F20    -5.2151    -0.7510    -0.2573 F
21 F21     3.6789    -3.7933    -0.3297 F
22 F22    -4.5018    -2.8303    -0.3336 F
23 F23     6.9216    -3.1800     0.9062 F
24 F24    -7.5155    -1.4748     0.8904 F
25 F25     5.7676    -5.0276     1.1919 F
26 F26    -6.8238    -3.5391     1.1860 F
27 F27     5.6107    -5.5292    -1.3587 F
28 F28    -6.7822    -4.0737    -1.3623 F
29 F29     6.2197    -3.5029    -1.9443 F
30 F30    -6.9007    -1.9638    -1.9567 F
31 C31     2.8343    -1.9833     1.8207 C
32 C32     2.3737    -1.6894     3.2614 C
33 H33     3.1677    -1.1492     3.7867 H
34 H34     2.2258    -2.6302     3.7973 H
35 H35    -2.8262    -2.0301     3.7922 H
36 H36    -3.3953    -0.3699     3.7794 H
37 H37    -2.6079    -1.9456     1.2715 H
38 H38    -3.2249    -0.3004     1.2934 H
39 H39     3.0223    -1.0406     1.3005 H
40 H40     2.0379    -2.4961     1.2763 H
41 H41     3.9137    -3.8111     2.2876 H
42 H42     4.9081    -2.3573     2.3650 H
43 H43    -4.7403    -2.7841     2.2831 H
44 H44    -5.3682    -1.1381     2.3536 H
45 I45    -0.4400    -3.5133     3.1753 I
46 C46     0.3199     2.8902     3.4720 C
47 H47    -0.5157     3.3391     4.0194 H
48 H48     1.2282     3.1316     4.0346 H
49 C49     0.4078     3.5224     2.0694 C
50 H50    -0.4996     3.2880     1.5065 H
51 H51     1.2427     3.0790     1.5208 H
52 C52     0.5884     5.0443     2.1495 C
53 H53     1.5069     5.2951     2.6880 H
54 H54    -0.2431     5.5033     2.6891 H
55 C55     0.6671     5.6939     0.7799 C
56 C56     0.9115     7.2362     0.8468 C
57 C57     0.7603     8.0149    -0.5085 C
58 C58     1.4120     9.4469    -0.4893 C
59 C59     0.9026    10.3877    -1.6380 C
60 C60     1.7997    11.6463    -1.8917 C
61 F61    -0.4913     5.4874     0.0791 F
62 F62     1.6812     5.1433     0.0485 F
63 F63     2.1639     7.4367     1.3327 F
64 F64     0.0285     7.7669     1.7304 F
65 F65    -0.5577     8.1454    -0.7785 F
66 F66     1.3388     7.3075    -1.5001 F
67 F67     2.7512     9.3101    -0.6043 F
68 F68     1.1386    10.0458     0.6908 F
69 F69    -0.3333    10.8267    -1.3252 F
70 F70     0.8416     9.6959    -2.7969 F
71 F71     2.9673    11.3019    -2.4384 F
72 F72     2.0289    12.3021    -0.7482 F
73 C73    -8.8641    -2.9579    -1.0855 C
74 C74    -9.4097    -3.7731    -2.3110 C
75 C75   -10.9304    -3.5506    -2.6132 C
76 C76     7.8943    -4.9304    -1.0723 C
77 C77     8.2389    -5.8457    -2.3001 C
78 C78     9.7705    -5.9819    -2.5984 C
79 F79   -11.1509    -2.3249    -3.0930 F
80 F80   -11.6634    -3.7254    -1.5076 F
81 F81    -9.2318    -5.0883    -2.0733 F
82 F82    -8.7239    -3.4321    -3.4240 F
83 F83    -9.3135    -3.5518     0.0420 F
84 F84    -9.3654    -1.7044    -1.1426 F
85 F85     8.6743    -3.8281    -1.1228 F
86 F86     8.1891    -5.6168     0.0536 F
87 F87     7.7593    -7.0843    -2.0682 F
88 F88     7.6543    -5.3507    -3.4131 F
89 F89    10.4397    -6.3259    -1.4920 F
90 F90    10.2712    -4.8395    -3.0731 F
91 F91     1.1611    12.4648    -2.7344 F
92 F92   -11.3199    -4.4420    -3.5307 F
93 F93     9.9448    -6.9365    -3.5185 F
@<TRIPOS>BOND
1 1 2 Ar
2 1 6 Ar
3 1 9 1
4 2 3 Ar
5 2 8 1
6 3 4 Ar
7 3 46 1
8 4 5 Ar
9 4 7 1
10 5 6 Ar
11 5 32 1
12 6 45 1
13 9 10 1
14 9 35 1
15 9 36 1
16 10 12 1
17 10 37 1
18 10 38 1
19 11 13 1
20 11 31 1
21 11 41 1
22 11 42 1
23 12 14 1
24 12 43 1
25 12 44 1
26 13 15 1
27 13 19 1
28 13 21 1
29 14 16 1
30 14 20 1
31 14 22 1
32 15 18 1
33 15 23 1
34 15 25 1
35 16 17 1
36 16 24 1
37 16 26 1
38 17 28 1
39 17 30 1
40 17 73 1
41 18 27 1
42 18 29 1
43 18 76 1
44 31 32 1
45 31 39 1
46 31 40 1
47 32 33 1
48 32 34 1
49 46 47 1
50 46 48 1
51 46 49 1
52 49 50 1
53 49 51 1
54 49 52 1
55 52 53 1
56 52 54 1
57 52 55 1
58 55 56 1
59 55 61 1
60 55 62 1
61 56 57 1
62 56 63 1
63 56 64 1
64 57 58 1
65 57 65 1
66 57 66 1
67 58 59 1
68 58 67 1
69 58 68 1
70 59 60 1
71 59 69 1
72 59 70 1
73 60 71 1
74 60 72 1
75 60 91 1
76 73 74 1
77 73 83 1
78 73 84 1
79 74 75 1
80 74 81 1
81 74 82 1
82 75 79 1
83 75 80 1
84 75 92 1
85 76 77 1
86 76 85 1
87 76 86 1
88 77 78 1
89 77 87 1
90 77 88 1
91 78 89 1
92 78 90 1
93 78 93 1

#  Title
# Created by Agui 10.1.7
#

#
#

@<TRIPOS>MOLECULE
29_b_ix_cl2_n6
95 93
SMALL
NO_CHARGES


@<TRIPOS>ATOM
1 C1    -1.3503    -1.0054     2.9357 C
2 C2    -1.1932     0.3730     3.1097 C
3 C3     0.0597     0.9806     3.1867 C
4 C4     1.1919     0.1730     3.0999 C
5 C5     1.1165    -1.2133     2.9245 C
6 C6    -0.1715    -1.7588     2.8328 C
7 H7     2.1756     0.6246     3.1877 H
8 H8    -2.0870     0.9821     3.2046 H
9 C9    -2.7571    -1.5608     2.8709 C
10 C10    -3.3493    -1.5467     1.4474 C
11 C11     4.3858    -2.7170     1.4317 C
12 C12    -4.7894    -2.0778     1.4505 C
13 C13     5.1023    -2.6117     0.0970 C
14 C14    -5.4381    -2.0029     0.0796 C
15 C15     6.4788    -3.3523     0.0847 C
16 C16    -6.9235    -2.4893     0.0812 C
17 C17    -7.5864    -2.6721    -1.3306 C
18 C18     7.1680    -3.4949    -1.3192 C
19 F19     5.3340    -1.2999    -0.2128 F
20 F20    -5.4232    -0.7157    -0.3812 F
21 F21     4.3385    -3.1337    -0.9085 F
22 F22    -4.7513    -2.7625    -0.8252 F
23 F23     7.3161    -2.6850     0.9210 F
24 F24    -7.6523    -1.5942     0.7977 F
25 F25     6.2930    -4.6000     0.5845 F
26 F26    -6.9773    -3.6837     0.7229 F
27 F27     6.5345    -4.4708    -2.0061 F
28 F28    -7.1177    -3.8167    -1.8748 F
29 F29     7.0470    -2.3362    -1.9986 F
30 F30    -7.2410    -1.6392    -2.1259 F
31 C31     3.0572    -1.9485     1.4455 C
32 C32     2.4144    -1.9885     2.8466 C
33 H33     3.1085    -1.5525     3.5721 H
34 H34     2.2657    -3.0244     3.1576 H
35 H35    -2.7906    -2.5726     3.2811 H
36 H36    -3.3868    -0.9508     3.5256 H
37 H37    -2.7329    -2.1483     0.7758 H
38 H38    -3.3332    -0.5248     1.0601 H
39 H39     3.2294    -0.9087     1.1564 H
40 H40     2.3735    -2.3752     0.7087 H
41 H41     4.2211    -3.7760     1.6419 H
42 H42     5.0639    -2.3312     2.1986 H
43 H43    -4.8161    -3.1194     1.7781 H
44 H44    -5.4121    -1.5008     2.1405 H
45 I45    -0.3585    -3.8757     2.5568 I
46 Cl46    -0.5013    -4.1785     5.0685 Cl
47 Cl47    -0.2180    -3.5796     0.0408 Cl
48 C48     0.1853     2.4783     3.3459 C
49 H49    -0.6554     2.8532     3.9387 H
50 H50     1.0952     2.7097     3.9090 H
51 C51     0.2226     3.2118     1.9907 C
52 H52    -0.6869     2.9858     1.4277 H
53 H53     1.0617     2.8409     1.3968 H
54 C54     0.3501     4.7292     2.1803 C
55 H55     1.2716     4.9745     2.7160 H
56 H56    -0.4845     5.1158     2.7696 H
57 C57     0.3719     5.4784     0.8598 C
58 C58     0.5643     7.0194     1.0353 C
59 C59     0.3519     7.8886    -0.2553 C
60 C60     0.9532     9.3384    -0.1450 C
61 C61     0.3818    10.3409    -1.2093 C
62 C62     1.2274    11.6470    -1.3900 C
63 F63    -0.7959     5.2796     0.1735 F
64 F64     1.3856     5.0181     0.0688 F
65 F65     1.8206     7.2281     1.5068 F
66 F66    -0.3143     7.4504     1.9757 F
67 F67    -0.9763     7.9888    -0.4847 F
68 F68     0.9299     7.2762    -1.3084 F
69 F69     2.2930     9.2592    -0.2999 F
70 F70     0.6888     9.8382     1.0823 F
71 F71    -0.8603    10.7095    -0.8364 F
72 F72     0.3157     9.7330    -2.4139 F
73 F73     2.3919    11.3864    -1.9872 F
74 F74     1.4627    12.2253    -0.2066 F
75 C75    -9.1575    -2.7453    -1.2848 C
76 C76    -9.7988    -3.3565    -2.5807 C
77 C77   -11.3326    -3.0806    -2.7377 C
78 C78     8.6982    -3.8518    -1.2368 C
79 C79     9.2864    -4.4217    -2.5759 C
80 C80    10.8507    -4.4085    -2.6548 C
81 F81   -11.5645    -1.7937    -3.0048 F
82 F82   -11.9913    -3.4212    -1.6240 F
83 F83    -9.6268    -4.6935    -2.5623 F
84 F84    -9.1845    -2.8503    -3.6723 F
85 F85    -9.5386    -3.5046    -0.2341 F
86 F86    -9.6400    -1.4950    -1.1117 F
87 F87     9.3819    -2.7342    -0.9053 F
88 F88     8.8894    -4.7773    -0.2711 F
89 F89     8.8837    -5.7004    -2.7188 F
90 F90     8.8242    -3.6972    -3.6184 F
91 F91    11.3842    -4.9810    -1.5696 F
92 F92    11.3159    -3.1623    -2.7633 F
93 F93     0.5390    12.5005    -2.1549 F
94 F94   -11.7985    -3.8157    -3.7528 F
95 F95    11.2312    -5.0992    -3.7346 F
@<TRIPOS>BOND
1 1 2 Ar
2 1 6 Ar
3 1 9 1
4 2 3 Ar
5 2 8 1
6 3 4 Ar
7 3 48 1
8 4 5 Ar
9 4 7 1
10 5 6 Ar
11 5 32 1
12 6 45 1
13 9 10 1
14 9 35 1
15 9 36 1
16 10 12 1
17 10 37 1
18 10 38 1
19 11 13 1
20 11 31 1
21 11 41 1
22 11 42 1
23 12 14 1
24 12 43 1
25 12 44 1
26 13 15 1
27 13 19 1
28 13 21 1
29 14 16 1
30 14 20 1
31 14 22 1
32 15 18 1
33 15 23 1
34 15 25 1
35 16 17 1
36 16 24 1
37 16 26 1
38 17 28 1
39 17 30 1
40 17 75 1
41 18 27 1
42 18 29 1
43 18 78 1
44 31 32 1
45 31 39 1
46 31 40 1
47 32 33 1
48 32 34 1
49 48 49 1
50 48 50 1
51 48 51 1
52 51 52 1
53 51 53 1
54 51 54 1
55 54 55 1
56 54 56 1
57 54 57 1
58 57 58 1
59 57 63 1
60 57 64 1
61 58 59 1
62 58 65 1
63 58 66 1
64 59 60 1
65 59 67 1
66 59 68 1
67 60 61 1
68 60 69 1
69 60 70 1
70 61 62 1
71 61 71 1
72 61 72 1
73 62 73 1
74 62 74 1
75 62 93 1
76 75 76 1
77 75 85 1
78 75 86 1
79 76 77 1
80 76 83 1
81 76 84 1
82 77 81 1
83 77 82 1
84 77 94 1
85 78 79 1
86 78 87 1
87 78 88 1
88 79 80 1
89 79 89 1
90 79 90 1
91 80 91 1
92 80 92 1
93 80 95 1

#  Title
# Created by Agui 10.1.7
#

#
#

@<TRIPOS>MOLECULE
30_a_x_n6
62 60
SMALL
NO_CHARGES


@<TRIPOS>ATOM
1 C1    -0.9912    -2.0434     0.2379 C
2 C2     0.0548     0.3419    -0.3584 C
3 C3    -2.5341    -1.6334     0.4740 C
4 C4    -0.1404     1.7316     0.3699 C
5 C5     0.0183     2.9754    -0.5984 C
6 C6    -3.5034    -2.1608    -0.6495 C
7 F7    -0.8063    -3.1046     1.0594 F
8 F8     1.1607     0.5549    -1.1249 F
9 F9    -0.8940    -2.4973    -1.0357 F
10 F10    -0.9741     0.1790    -1.2228 F
11 F11    -2.9509    -2.1892     1.6311 F
12 F12     0.8075     1.8582     1.3290 F
13 F13    -2.6824    -0.3020     0.5755 F
14 F14    -1.3543     1.8046     0.9413 F
15 F15    -3.2593    -1.4883    -1.7937 F
16 F16    -0.5898     2.7240    -1.7741 F
17 F17    -3.2763    -3.4772    -0.8411 F
18 F18     1.3316     3.1913    -0.8201 F
19 C19     1.5425    -1.7913    -0.1057 C
20 C20     2.9803    -1.2531     0.3438 C
21 C21     4.1179    -1.6087    -0.6839 C
22 C22     5.5687    -1.4633    -0.0862 C
23 C23     6.6885    -1.3751    -1.1834 C
24 C24     8.1387    -1.6344    -0.6508 C
25 F25     1.5075    -1.8286    -1.4538 F
26 F26     1.5283    -3.0776     0.3182 F
27 F27     3.2912    -1.8316     1.5303 F
28 F28     2.9857     0.0827     0.5317 F
29 F29     4.0032    -0.7862    -1.7471 F
30 F30     3.9652    -2.8858    -1.0884 F
31 F31     5.8153    -2.5319     0.7015 F
32 F32     5.6346    -0.3456     0.6688 F
33 F33     6.6680    -0.1415    -1.7258 F
34 F34     6.4441    -2.2849    -2.1517 F
35 F35     8.3044    -2.9156    -0.3166 F
36 F36     8.3938    -0.8676     0.4152 F
37 C37    -0.6057     4.2928    -0.0009 C
38 C38    -0.0953     5.6011    -0.7038 C
39 C39    -5.0321    -1.9983    -0.2916 C
40 C40    -5.9751    -2.1092    -1.5433 C
41 C41    -7.4818    -2.3636    -1.1980 C
42 F42    -1.1668     7.0272     0.8903 F
43 F43    -2.1542     6.7797    -1.0338 F
44 F44    -0.0690     5.4154    -2.0417 F
45 F45     1.1544     5.8666    -0.2740 F
46 F46    -1.9484     4.2292    -0.1287 F
47 F47    -0.2963     4.3777     1.3112 F
48 F48    -5.3713    -2.9621     0.5914 F
49 F49    -5.2464    -0.7956     0.2817 F
50 F50    -5.9071    -0.9580    -2.2416 F
51 F51    -5.5654    -3.1260    -2.3330 F
52 F52    -7.9173    -1.4758    -0.2971 F
53 F53    -7.6629    -3.5960    -0.7191 F
54 C54     0.2323    -1.0180     0.4944 C
55 C55     0.5450    -0.8988     2.0116 C
56 I56    -0.9047    -0.2965     3.5221 I
57 H57     0.8379    -1.8828     2.3593 H
58 H58     1.3590    -0.2067     2.1725 H
59 C59    -0.9710     6.8695    -0.4237 C
60 F60    -8.2046    -2.2312    -2.3148 F
61 F61     9.0100    -1.3303    -1.6174 F
62 F62    -0.3300     7.9440    -0.8942 F
@<TRIPOS>BOND
1 1 3 1
2 1 7 1
3 1 9 1
4 1 54 1
5 2 4 1
6 2 8 1
7 2 10 1
8 2 54 1
9 3 6 1
10 3 11 1
11 3 13 1
12 4 5 1
13 4 12 1
14 4 14 1
15 5 16 1
16 5 18 1
17 5 37 1
18 6 15 1
19 6 17 1
20 6 39 1
21 19 20 1
22 19 25 1
23 19 26 1
24 20 21 1
25 20 27 1
26 20 28 1
27 21 22 1
28 21 29 1
29 21 30 1
30 22 23 1
31 22 31 1
32 22 32 1
33 23 24 1
34 23 33 1
35 23 34 1
36 24 35 1
37 24 36 1
38 24 61 1
39 37 38 1
40 37 46 1
41 37 47 1
42 38 44 1
43 38 45 1
44 38 59 1
45 39 40 1
46 39 48 1
47 39 49 1
48 40 41 1
49 40 50 1
50 40 51 1
51 41 52 1
52 41 53 1
53 41 60 1
54 42 59 1
55 43 59 1
56 54 55 1
57 55 56 1
58 55 57 1
59 55 58 1
60 59 62 1

#  Title
# Created by Agui 10.1.7
#

#
#

@<TRIPOS>MOLECULE
30_b_x_cl2_n6
64 59
SMALL
NO_CHARGES


@<TRIPOS>ATOM
1 C1    -0.4995    -1.6652    -0.4641 C
2 C2     0.3659     0.8525    -0.7067 C
3 C3    -2.0594    -1.3984    -0.4162 C
4 C4    -0.4821     1.9415     0.0567 C
5 C5    -1.1207     3.0295    -0.8847 C
6 C6    -2.9121    -2.5785    -1.0468 C
7 F7    -0.2982    -2.7384     0.3311 F
8 F8     1.5672     1.4473    -0.9137 F
9 F9    -0.2497    -2.0289    -1.7469 F
10 F10    -0.1791     0.6463    -1.9275 F
11 F11    -2.4353    -1.2361     0.8718 F
12 F12     0.3475     2.5627     0.9180 F
13 F13    -2.3825    -0.2884    -1.1025 F
14 F14    -1.4676     1.3417     0.7610 F
15 F15    -2.8721    -2.4505    -2.3903 F
16 F16    -2.1762     2.4852    -1.5233 F
17 F17    -2.3995    -3.7748    -0.7097 F
18 F18    -0.1994     3.4086    -1.7942 F
19 C19     2.0074    -1.1403    -0.6334 C
20 C20     3.3927    -0.7056     0.0471 C
21 C21     4.6121    -0.8165    -0.9446 C
22 C22     6.0089    -0.8252    -0.2149 C
23 C23     7.2102    -0.4852    -1.1674 C
24 C24     8.6173    -0.8718    -0.5976 C
25 F25     2.0709    -0.8279    -1.9429 F
26 F26     2.0147    -2.4874    -0.5354 F
27 F27     3.6201    -1.5414     1.0917 F
28 F28     3.3627     0.5500     0.5329 F
29 F29     4.5666     0.2363    -1.7866 F
30 F30     4.5076    -1.9588    -1.6519 F
31 F31     6.2047    -2.0516     0.3140 F
32 F32     5.9977     0.0812     0.7858 F
33 F33     7.2143     0.8418    -1.4018 F
34 F34     7.0534    -1.1380    -2.3397 F
35 F35     8.7721    -2.1965    -0.5641 F
36 F36     8.7764    -0.3806     0.6363 F
37 C37    -1.6052     4.3131    -0.1118 C
38 C38    -2.6042     5.1979    -0.9394 C
39 C39    -2.7909     6.6519    -0.3876 C
40 C40    -4.4182    -2.5476    -0.5829 C
41 C41    -5.3736    -3.3814    -1.5091 C
42 C42    -6.7685    -3.7055    -0.8739 C
43 F43    -1.6903     7.3816    -0.5791 F
44 F44    -3.0789     6.6271     0.9180 F
45 F45    -3.8134     4.6028    -0.9396 F
46 F46    -2.1657     5.3007    -2.2135 F
47 F47    -2.2225     3.9370     1.0274 F
48 F48    -0.5238     5.0570     0.2024 F
49 F49    -4.4880    -3.0405     0.6711 F
50 F50    -4.8587    -1.2705    -0.5730 F
51 F51    -5.5936    -2.6867    -2.6431 F
52 F52    -4.7882    -4.5578    -1.8221 F
53 F53    -7.3419    -2.5928    -0.4020 F
54 F54    -6.6497    -4.5900     0.1176 F
55 C55     0.5916    -0.5673    -0.0088 C
56 C56     0.8720    -0.5662     1.5301 C
57 I57    -0.5033    -0.5752     3.2955 I
58 H58     1.3993    -1.4802     1.7819 H
59 H59     1.4660     0.2992     1.8091 H
60 Cl60    -0.9052    -3.0592     3.2354 Cl
61 Cl61    -0.0380     1.8476     3.8267 Cl
62 F62    -3.8038     7.2296    -1.0408 F
63 F63    -7.5571    -4.2276    -1.8185 F
64 F64     9.5573    -0.3523    -1.3923 F
@<TRIPOS>BOND
1 1 3 1
2 1 7 1
3 1 9 1
4 1 55 1
5 2 4 1
6 2 8 1
7 2 10 1
8 2 55 1
9 3 6 1
10 3 11 1
11 3 13 1
12 4 5 1
13 4 12 1
14 4 14 1
15 5 16 1
16 5 18 1
17 5 37 1
18 6 15 1
19 6 17 1
20 6 40 1
21 19 20 1
22 19 25 1
23 19 26 1
24 20 21 1
25 20 27 1
26 20 28 1
27 21 22 1
28 21 29 1
29 21 30 1
30 22 23 1
31 22 31 1
32 22 32 1
33 23 24 1
34 23 33 1
35 23 34 1
36 24 35 1
37 24 36 1
38 24 64 1
39 37 38 1
40 37 47 1
41 37 48 1
42 38 39 1
43 38 45 1
44 38 46 1
45 39 43 1
46 39 44 1
47 39 62 1
48 40 41 1
49 40 49 1
50 40 50 1
51 41 42 1
52 41 51 1
53 41 52 1
54 42 53 1
55 42 54 1
56 42 63 1
57 55 56 1
58 56 58 1
59 56 59 1

#  Title
# Created by Agui 10.1.7
#

#
#

@<TRIPOS>MOLECULE
31_a_xii_n6
69 69
SMALL
NO_CHARGES


@<TRIPOS>ATOM
1 C1    -0.4599     1.3654    -0.4957 C
2 C2     0.5986    -0.1454     1.4601 C
3 C3     0.0709     2.7406     0.0628 C
4 F4     0.3639     1.0294    -1.5154 F
5 F5     0.8181     0.9901     2.1788 F
6 F6    -0.5774     3.0457     1.2085 F
7 F7     1.3919     2.6577     0.3129 F
8 C8    -0.9072    -1.1712    -0.4143 C
9 C9    -1.3871    -2.5411     0.2281 C
10 F10     0.2367    -1.4772    -1.0755 F
11 F11    -1.8272    -0.8574    -1.3646 F
12 F12    -2.3334    -2.3282     1.1659 F
13 F13    -0.3446    -3.1561     0.8143 F
14 C14    -0.6681     0.1148     0.5174 C
15 F15     0.2500    -1.1210     2.3379 F
16 C16     2.0400    -0.5730     0.9278 C
17 C17     3.1846    -0.2690     1.9777 C
18 C18     4.5087    -1.0729     1.6878 C
19 C19     5.7704    -0.4745     2.4067 C
20 C20     6.9969    -1.4464     2.4772 C
21 C21    -0.1442     4.0136    -0.8656 C
22 C22     0.4309     3.9722    -2.3245 C
23 C23     0.5652     5.3904    -2.9891 C
24 C24     0.7316     5.3567    -4.5467 C
25 C25    -2.0442    -3.5871    -0.7725 C
26 C26    -1.2067    -4.0495    -2.0164 C
27 C27    -1.7446    -5.3674    -2.6835 C
28 C28    -1.2060    -5.6193    -4.1332 C
29 F29     0.1268    -5.5140    -4.1673 F
30 F30    -1.7350    -4.7518    -4.9985 F
31 F31    -1.3791    -6.4194    -1.9252 F
32 F32    -3.0930    -5.3264    -2.7553 F
33 F33     0.0687    -4.2705    -1.6368 F
34 F34    -1.2221    -3.0635    -2.9407 F
35 F35    -2.2879    -4.6824    -0.0130 F
36 F36    -3.2262    -3.0975    -1.1959 F
37 F37     2.0570    -1.9002     0.6940 F
38 F38     2.3503     0.0796    -0.2047 F
39 F39     3.4710     1.0488     1.9445 F
40 F40     2.7662    -0.5983     3.2181 F
41 F41     4.7499    -1.0770     0.3595 F
42 F42     4.3396    -2.3464     2.1033 F
43 F43     6.1653     0.6313     1.7454 F
44 F44     5.4502    -0.1361     3.6754 F
45 F45     6.7627    -2.4540     3.3203 F
46 F46     7.2759    -1.9437     1.2674 F
47 F47    -1.6621     1.6625    -1.0542 F
48 F48     0.4763     5.0234    -0.2073 F
49 F49    -1.4590     4.2951    -0.9235 F
50 F50     1.6566     3.4088    -2.3061 F
51 F51    -0.3872     3.2157    -3.0896 F
52 F52     1.6473     6.0097    -2.4779 F
53 F53    -0.5322     6.1295    -2.7166 F
54 F54     1.7064     4.5118    -4.9001 F
55 F55    -0.4039     4.9869    -5.1425 F
56 C56    -1.9372     0.4099     1.3979 C
57 C57    -3.2038     0.4525     0.7925 C
58 C58    -1.8852     0.6486     2.7786 C
59 C59    -4.3574     0.7204     1.5218 C
60 H60    -3.3260     0.2744    -0.2624 H
61 C61    -3.0350     0.9178     3.5164 C
62 H62    -0.9599     0.6399     3.3270 H
63 C63    -4.2742     0.9548     2.8893 C
64 H64    -5.3114     0.7407     1.0113 H
65 H65    -2.9461     1.0971     4.5800 H
66 I66    -6.0205     1.3637     4.0069 I
67 F67     8.0589    -0.7632     2.9161 F
68 F68     1.0529     6.5837    -4.9690 F
69 F69    -1.5490    -6.8558    -4.5077 F
@<TRIPOS>BOND
1 1 3 1
2 1 4 1
3 1 14 1
4 1 47 1
5 2 5 1
6 2 14 1
7 2 15 1
8 2 16 1
9 3 6 1
10 3 7 1
11 3 21 1
12 8 9 1
13 8 10 1
14 8 11 1
15 8 14 1
16 9 12 1
17 9 13 1
18 9 25 1
19 14 56 1
20 16 17 1
21 16 37 1
22 16 38 1
23 17 18 1
24 17 39 1
25 17 40 1
26 18 19 1
27 18 41 1
28 18 42 1
29 19 20 1
30 19 43 1
31 19 44 1
32 20 45 1
33 20 46 1
34 20 67 1
35 21 22 1
36 21 48 1
37 21 49 1
38 22 23 1
39 22 50 1
40 22 51 1
41 23 24 1
42 23 52 1
43 23 53 1
44 24 54 1
45 24 55 1
46 24 68 1
47 25 26 1
48 25 35 1
49 25 36 1
50 26 27 1
51 26 33 1
52 26 34 1
53 27 28 1
54 27 31 1
55 27 32 1
56 28 29 1
57 28 30 1
58 28 69 1
59 56 57 Ar
60 56 58 Ar
61 57 59 Ar
62 57 60 1
63 58 61 Ar
64 58 62 1
65 59 63 Ar
66 59 64 1
67 61 63 Ar
68 61 65 1
69 63 66 1

#  Title
# Created by Agui 10.1.7
#

#
#

@<TRIPOS>MOLECULE
31_b_xii_cl2_n6
71 69
SMALL
NO_CHARGES


@<TRIPOS>ATOM
1 C1    -0.1502     1.2498    -0.7851 C
2 C2     0.6682    -0.0624     1.4182 C
3 C3     0.0112     2.6943    -0.1750 C
4 F4     0.9235     1.0488    -1.5803 F
5 F5     0.5322     1.0948     2.1225 F
6 F6    -0.9224     2.8821     0.7847 F
7 F7     1.2354     2.8298     0.3686 F
8 C8    -0.1914    -1.3291    -0.7034 C
9 C9    -0.5803    -2.7555    -0.1252 C
10 F10     1.1043    -1.4415    -1.0808 F
11 F11    -0.9137    -1.1723    -1.8443 F
12 F12    -1.7302    -2.6858     0.5788 F
13 F13     0.3907    -3.1900     0.6962 F
14 C14    -0.3765    -0.0168     0.2062 C
15 F15     0.2871    -1.0799     2.2326 F
16 C16     2.2419    -0.2479     1.2368 C
17 C17     3.0551     0.2435     2.5026 C
18 C18     4.5217    -0.3316     2.5467 C
19 C19     5.4748     0.4674     3.5056 C
20 C20     6.7935    -0.2886     3.8848 C
21 C21    -0.1920     3.9149    -1.1738 C
22 C22     0.6992     3.9679    -2.4636 C
23 C23     0.7505     5.3874    -3.1364 C
24 C24     1.2725     5.3794    -4.6138 C
25 C25    -0.8351    -3.8990    -1.1993 C
26 C26     0.3162    -4.2280    -2.2136 C
27 C27     0.1482    -5.6175    -2.9288 C
28 C28     1.0258    -5.7875    -4.2158 C
29 F29     2.3007    -5.4718    -3.9627 F
30 F30     0.5741    -5.0181    -5.2083 F
31 F31     0.4942    -6.5938    -2.0676 F
32 F32    -1.1412    -5.7900    -3.2928 F
33 F33     1.4951    -4.2397    -1.5579 F
34 F34     0.3521    -3.2598    -3.1563 F
35 F35    -1.0680    -5.0128    -0.4658 F
36 F36    -1.9563    -3.6032    -1.8860 F
37 F37     2.5213    -1.5544     1.0647 F
38 F38     2.6888     0.4447     0.1761 F
39 F39     3.1247     1.5902     2.4812 F
40 F40     2.4236    -0.1481     3.6294 F
41 F41     5.0534    -0.2971     1.3063 F
42 F42     4.4680    -1.6150     2.9619 F
43 F43     5.8254     1.6228     2.9072 F
44 F44     4.8247     0.7488     4.6566 F
45 F45     6.5391    -1.3209     4.6911 F
46 F46     7.4148    -0.7331     2.7869 F
47 F47    -1.2292     1.3406    -1.6057 F
48 F48     0.0904     5.0120    -0.4305 F
49 F49    -1.4867     3.9711    -1.5348 F
50 F50     1.9625     3.6147    -2.1476 F
51 F51     0.2096     3.0833    -3.3611 F
52 F52     1.5719     6.1783    -2.4186 F
53 F53    -0.4850     5.9325    -3.1470 F
54 F54     2.4263     4.7085    -4.7035 F
55 F55     0.3791     4.8231    -5.4345 F
56 C56    -1.8448     0.0680     0.7693 C
57 C57    -2.9276    -0.1010    -0.1095 C
58 C58    -2.1399     0.3174     2.1174 C
59 C59    -4.2457    -0.0242     0.3281 C
60 H60    -2.7741    -0.3013    -1.1559 H
61 C61    -3.4534     0.3975     2.5728 C
62 H62    -1.3717     0.4628     2.8556 H
63 C63    -4.4864     0.2258     1.6683 C
64 H64    -5.0525    -0.1616    -0.3793 H
65 H65    -3.6421     0.5922     3.6201 H
66 I66    -6.4920     0.3473     2.3537 I
67 Cl67    -6.4767     2.8191     1.8324 Cl
68 Cl68    -6.4289    -2.1296     2.8482 Cl
69 F69     7.6042     0.5607     4.5235 F
70 F70     1.4780     6.6417    -5.0014 F
71 F71     0.9683    -7.0640    -4.6067 F
@<TRIPOS>BOND
1 1 3 1
2 1 4 1
3 1 14 1
4 1 47 1
5 2 5 1
6 2 14 1
7 2 15 1
8 2 16 1
9 3 6 1
10 3 7 1
11 3 21 1
12 8 9 1
13 8 10 1
14 8 11 1
15 8 14 1
16 9 12 1
17 9 13 1
18 9 25 1
19 14 56 1
20 16 17 1
21 16 37 1
22 16 38 1
23 17 18 1
24 17 39 1
25 17 40 1
26 18 19 1
27 18 41 1
28 18 42 1
29 19 20 1
30 19 43 1
31 19 44 1
32 20 45 1
33 20 46 1
34 20 69 1
35 21 22 1
36 21 48 1
37 21 49 1
38 22 23 1
39 22 50 1
40 22 51 1
41 23 24 1
42 23 52 1
43 23 53 1
44 24 54 1
45 24 55 1
46 24 70 1
47 25 26 1
48 25 35 1
49 25 36 1
50 26 27 1
51 26 33 1
52 26 34 1
53 27 28 1
54 27 31 1
55 27 32 1
56 28 29 1
57 28 30 1
58 28 71 1
59 56 57 Ar
60 56 58 Ar
61 57 59 Ar
62 57 60 1
63 58 61 Ar
64 58 62 1
65 59 63 2
66 59 64 1
67 61 63 2
68 61 65 1
69 63 66 1

#  Title
# Created by Agui 10.1.7
#

#
#

@<TRIPOS>MOLECULE
32_a_xii_n8
87 87
SMALL
NO_CHARGES


@<TRIPOS>ATOM
1 C1     0.3425    -1.6634     0.7393 C
2 C2    -0.7529     0.5189     1.8643 C
3 C3    -0.8210    -2.6484     1.1406 C
4 F4     0.1521    -1.3673    -0.5674 F
5 F5    -1.6266    -0.2944     2.5197 F
6 F6    -0.8178    -2.8333     2.4793 F
7 F7    -2.0094    -2.1337     0.7703 F
8 C8     1.6141     0.5780     0.7559 C
9 C9     2.2762     1.8670     1.4033 C
10 F10     1.0040     1.0263    -0.3693 F
11 F11     2.6438    -0.2094     0.3463 F
12 F12     2.6491     1.6282     2.6779 F
13 F13     1.3900     2.8785     1.4068 F
14 C14     0.5886    -0.3157     1.6096 C
15 F15    -0.4371     1.5376     2.7047 F
16 C16    -1.6191     1.1975     0.7097 C
17 C17    -3.1028     1.5021     1.1695 C
18 C18    -3.8231     2.5565     0.2444 C
19 C19    -5.3907     2.5408     0.3923 C
20 C20    -6.0811     3.8401    -0.1653 C
21 C21    -0.7453    -4.1183     0.5378 C
22 C22    -0.6605    -4.2740    -1.0218 C
23 C23    -1.0359    -5.7186    -1.5277 C
24 C24    -0.5338    -6.0115    -2.9902 C
25 C25    -1.2552    -7.2296    -3.6685 C
26 C26    -0.5248    -7.7924    -4.9347 C
27 C27     3.5952     2.4028     0.6953 C
28 C28     3.5200     2.7653    -0.8306 C
29 C29     4.7136     3.6720    -1.3180 C
30 C30     4.8952     3.6669    -2.8812 C
31 C31     5.7543     4.8668    -3.4163 C
32 C32     6.2842     4.6831    -4.8788 C
33 C33    -7.6185     3.6677    -0.4321 C
34 C34    -8.4024     5.0134    -0.5990 C
35 F35     5.2853     4.3522    -5.7044 F
36 F36     7.2260     3.7392    -4.9323 F
37 F37     6.8161     5.8387    -5.2892 F
38 F38     5.0019     5.9846    -3.3928 F
39 F39     6.8284     5.0437    -2.6156 F
40 F40     3.6805     3.7266    -3.4680 F
41 F41     5.4945     2.5107    -3.2384 F
42 F42     4.4823     4.9378    -0.9123 F
43 F43     5.8614     3.2355    -0.7588 F
44 F44     2.3699     3.4267    -1.0704 F
45 F45     3.5285     1.6204    -1.5477 F
46 F46     3.9115     3.5342     1.3704 F
47 F47     4.5831     1.5070     0.8881 F
48 F48    -1.0609     2.3738     0.3621 F
49 F49    -1.6886     0.4037    -0.3719 F
50 F50    -3.8135     0.3557     1.1421 F
51 F51    -3.0996     1.9900     2.4278 F
52 F52    -3.5198     2.2977    -1.0445 F
53 F53    -3.3717     3.7876     0.5641 F
54 F54    -5.8732     1.4720    -0.2755 F
55 F55    -5.7087     2.4220     1.6989 F
56 F56    -5.9050     4.8360     0.7294 F
57 F57    -5.4907     4.1907    -1.3280 F
58 F58    -7.7861     2.9553    -1.5637 F
59 F59    -8.1813     2.9962     0.5968 F
60 F60    -8.4855     5.6668     0.5615 F
61 F61    -7.8047     5.7988    -1.5018 F
62 F62    -9.6402     4.7377    -1.0216 F
63 F63     1.4694    -2.4193     0.8025 F
64 F64    -1.8916    -4.7140     0.9496 F
65 F65     0.2913    -4.7667     1.0996 F
66 F66    -1.5065    -3.3980    -1.6008 F
67 F67     0.6021    -3.9955    -1.4137 F
68 F68    -2.3787    -5.8470    -1.4967 F
69 F69    -0.4888    -6.6357    -0.7030 F
70 F70    -0.7437    -4.9202    -3.7573 F
71 F71     0.7922    -6.2628    -2.9452 F
72 F72    -2.4907    -6.8473    -4.0471 F
73 F73    -1.3619    -8.2417    -2.7795 F
74 F74     0.6101    -8.4090    -4.5991 F
75 F75    -0.2495    -6.8079    -5.7972 F
76 F76    -1.3283    -8.6766    -5.5341 F
77 C77     1.2251    -0.7362     2.9847 C
78 C78     2.5173    -1.2862     3.0092 C
79 C79     0.5678    -0.6047     4.2163 C
80 C80     3.1226    -1.6859     4.1960 C
81 H81     3.0882    -1.4146     2.1053 H
82 C82     1.1662    -1.0023     5.4090 C
83 H83    -0.4249    -0.1980     4.2951 H
84 C84     2.4452    -1.5446     5.4015 C
85 H85     4.1209    -2.1026     4.1648 H
86 H86     0.6199    -0.8828     6.3356 H
87 I87     3.3549    -2.1497     7.2105 I
@<TRIPOS>BOND
1 1 3 1
2 1 4 1
3 1 14 1
4 1 63 1
5 2 5 1
6 2 14 1
7 2 15 1
8 2 16 1
9 3 6 1
10 3 7 1
11 3 21 1
12 8 9 1
13 8 10 1
14 8 11 1
15 8 14 1
16 9 12 1
17 9 13 1
18 9 27 1
19 14 77 1
20 16 17 1
21 16 48 1
22 16 49 1
23 17 18 1
24 17 50 1
25 17 51 1
26 18 19 1
27 18 52 1
28 18 53 1
29 19 20 1
30 19 54 1
31 19 55 1
32 20 33 1
33 20 56 1
34 20 57 1
35 21 22 1
36 21 64 1
37 21 65 1
38 22 23 1
39 22 66 1
40 22 67 1
41 23 24 1
42 23 68 1
43 23 69 1
44 24 25 1
45 24 70 1
46 24 71 1
47 25 26 1
48 25 72 1
49 25 73 1
50 26 74 1
51 26 75 1
52 26 76 1
53 27 28 1
54 27 46 1
55 27 47 1
56 28 29 1
57 28 44 1
58 28 45 1
59 29 30 1
60 29 42 1
61 29 43 1
62 30 31 1
63 30 40 1
64 30 41 1
65 31 32 1
66 31 38 1
67 31 39 1
68 32 35 1
69 32 36 1
70 32 37 1
71 33 34 1
72 33 58 1
73 33 59 1
74 34 60 1
75 34 61 1
76 34 62 1
77 77 78 Ar
78 77 79 Ar
79 78 80 Ar
80 78 81 1
81 79 82 Ar
82 79 83 1
83 80 84 Ar
84 80 85 1
85 82 84 Ar
86 82 86 1
87 84 87 1

#  Title
# Created by Agui 10.1.7
#

#
#

@<TRIPOS>MOLECULE
32_b_xii_cl2_n8
89 87
SMALL
NO_CHARGES


@<TRIPOS>ATOM
1 C1    -0.8038     1.4103     0.1389 C
2 C2     0.6573    -0.1707     1.7551 C
3 C3    -0.1848     2.7679     0.6476 C
4 F4    -0.2088     1.1382    -1.0432 F
5 F5     1.0071     0.9339     2.4702 F
6 F6    -0.5881     2.9958     1.9179 F
7 F7     1.1594     2.7010     0.6174 F
8 C8    -1.1955    -1.1397     0.1824 C
9 C9    -1.5164    -2.5464     0.8441 C
10 F10    -0.2114    -1.3867    -0.7144 F
11 F11    -2.2974    -0.7988    -0.5371 F
12 F12    -2.2433    -2.3868     1.9707 F
13 F13    -0.3688    -3.1664     1.1677 F
14 C14    -0.7804     0.1071     1.1081 C
15 F15     0.5054    -1.1926     2.6363 F
16 C16     1.9604    -0.5428     0.9143 C
17 C17     3.2947    -0.2654     1.7198 C
18 C18     4.5377    -1.0284     1.1208 C
19 C19     5.9160    -0.4377     1.6014 C
20 C20     7.1239    -1.4226     1.3849 C
21 C21    -0.6040     4.0814    -0.1455 C
22 C22    -0.3425     4.1211    -1.6927 C
23 C23    -0.3674     5.5770    -2.2950 C
24 C24    -0.5542     5.5959    -3.8575 C
25 C25    -0.1448     6.9581    -4.5215 C
26 C26    -0.6791     7.1542    -5.9809 C
27 C27    -2.3650    -3.5578    -0.0414 C
28 C28    -1.8042    -3.9470    -1.4555 C
29 C29    -2.4637    -5.2470    -2.0541 C
30 C30    -2.2495    -5.3898    -3.6066 C
31 C31    -2.4939    -6.8451    -4.1418 C
32 C32    -2.6804    -6.9419    -5.6941 C
33 C33     8.5250    -0.7166     1.4370 C
34 C34     9.7360    -1.6921     1.6253 C
35 F35    -1.6828    -6.3162    -6.3285 F
36 F36    -3.8424    -6.4052    -6.0712 F
37 F37    -2.6723    -8.2310    -6.0461 F
38 F38    -1.4377    -7.6130    -3.8091 F
39 F39    -3.6058    -7.3545    -3.5672 F
40 F40    -0.9822    -5.0375    -3.9119 F
41 F41    -3.0981    -4.5475    -4.2341 F
42 F42    -1.9241    -6.3203    -1.4404 F
43 F43    -3.7906    -5.2236    -1.8110 F
44 F44    -0.4761    -4.1582    -1.3587 F
45 F45    -2.0260    -2.9196    -2.3045 F
46 F46    -2.4334    -4.6883     0.7004 F
47 F47    -3.6120    -3.0664    -0.1795 F
48 F48     1.9397    -1.8560     0.6148 F
49 F49     2.0192     0.1705    -0.2224 F
50 F50     3.5525     1.0583     1.6938 F
51 F51     3.1425    -0.6613     3.0010 F
52 F52     4.4948    -0.9570    -0.2258 F
53 F53     4.4672    -2.3229     1.4956 F
54 F54     6.1549     0.7007     0.9176 F
55 F55     5.8359    -0.1504     2.9179 F
56 F56     7.0793    -2.3711     2.3447 F
57 F57     6.9980    -2.0175     0.1793 F
58 F58     8.7166    -0.0461     0.2838 F
59 F59     8.5481     0.1611     2.4643 F
60 F60     9.7436    -2.2146     2.8531 F
61 F61     9.6870    -2.6829     0.7281 F
62 F62    10.8692    -1.0063     1.4472 F
63 F63    -2.1007     1.7054    -0.1382 F
64 F64     0.1284     5.0692     0.4238 F
65 F65    -1.9049     4.3321     0.0864 F
66 F66     0.8674     3.5838    -1.9500 F
67 F67    -1.2936     3.3833    -2.3068 F
68 F68     0.7977     6.1848    -1.9894 F
69 F69    -1.3827     6.2703    -1.7399 F
70 F70     0.2006     4.6189    -4.4048 F
71 F71    -1.8523     5.3496    -4.1358 F
72 F72     1.2001     7.0324    -4.5663 F
73 F73    -0.6167     7.9815    -3.7761 F
74 F74    -2.0016     7.3316    -5.9871 F
75 F75    -0.3759     6.0954    -6.7401 F
76 F76    -0.1014     8.2391    -6.5056 F
77 C77    -1.8440     0.3341     2.2469 C
78 C78    -3.2080     0.3768     1.9134 C
79 C79    -1.5030     0.5098     3.5958 C
80 C80    -4.1913     0.5855     2.8748 C
81 H81    -3.5413     0.2438     0.8986 H
82 C82    -2.4742     0.7200     4.5713 C
83 H83    -0.4832     0.4960     3.9363 H
84 C84    -3.8049     0.7552     4.1934 C
85 H85    -5.2315     0.6100     2.5788 H
86 H86    -2.1729     0.8522     5.6018 H
87 I87    -5.2919     1.0758     5.6741 I
88 Cl88    -5.1331     3.5589     5.2369 Cl
89 Cl89    -5.3920    -1.4201     6.0537 Cl
@<TRIPOS>BOND
1 1 3 1
2 1 4 1
3 1 14 1
4 1 63 1
5 2 5 1
6 2 14 1
7 2 15 1
8 2 16 1
9 3 6 1
10 3 7 1
11 3 21 1
12 8 9 1
13 8 10 1
14 8 11 1
15 8 14 1
16 9 12 1
17 9 13 1
18 9 27 1
19 14 77 1
20 16 17 1
21 16 48 1
22 16 49 1
23 17 18 1
24 17 50 1
25 17 51 1
26 18 19 1
27 18 52 1
28 18 53 1
29 19 20 1
30 19 54 1
31 19 55 1
32 20 33 1
33 20 56 1
34 20 57 1
35 21 22 1
36 21 64 1
37 21 65 1
38 22 23 1
39 22 66 1
40 22 67 1
41 23 24 1
42 23 68 1
43 23 69 1
44 24 25 1
45 24 70 1
46 24 71 1
47 25 26 1
48 25 72 1
49 25 73 1
50 26 74 1
51 26 75 1
52 26 76 1
53 27 28 1
54 27 46 1
55 27 47 1
56 28 29 1
57 28 44 1
58 28 45 1
59 29 30 1
60 29 42 1
61 29 43 1
62 30 31 1
63 30 40 1
64 30 41 1
65 31 32 1
66 31 38 1
67 31 39 1
68 32 35 1
69 32 36 1
70 32 37 1
71 33 34 1
72 33 58 1
73 33 59 1
74 34 60 1
75 34 61 1
76 34 62 1
77 77 78 Ar
78 77 79 Ar
79 78 80 Ar
80 78 81 1
81 79 82 Ar
82 79 83 1
83 80 84 2
84 80 85 1
85 82 84 2
86 82 86 1
87 84 87 1

#  Title
# Created by Agui 10.1.7
#

#
#

@<TRIPOS>MOLECULE
33_a_xiii
48 49
SMALL
NO_CHARGES


@<TRIPOS>ATOM
1 C1    -0.3748    -0.5345     0.8753 C
2 C2    -1.4790    -1.0411    -0.1173 C
3 C3    -2.8121    -1.4905     0.5968 C
4 C4    -3.7305    -2.3857    -0.3156 C
5 C5    -5.2170    -2.4709     0.1820 C
6 C6    -6.0458    -3.6407    -0.4489 C
7 F7     0.0665    -1.6169     1.5601 F
8 F8    -0.9463     0.3184     1.7570 F
9 F9    -0.9845    -2.0870    -0.8139 F
10 F10    -1.7959    -0.0537    -0.9791 F
11 F11    -2.5184    -2.1919     1.7105 F
12 F12    -3.4988    -0.3825     0.9491 F
13 F13    -3.2128    -3.6328    -0.3498 F
14 F14    -3.7382    -1.8845    -1.5694 F
15 F15    -5.2355    -2.6396     1.5226 F
16 F16    -5.8440    -1.3174    -0.1226 F
17 F17    -5.6279    -4.8240     0.0054 F
18 F18    -5.9465    -3.6244    -1.7827 F
19 F19    -7.3300    -3.4854    -0.1119 F
20 C20     0.8426     1.5270    -0.4823 C
21 C21     0.1182     2.7235     0.2268 C
22 F22     0.2736     1.3309    -1.6872 F
23 F23     2.1343     1.8951    -0.6905 F
24 C24     0.4669     4.1295    -0.3908 C
25 F25    -1.2172     2.5314     0.1276 F
26 F26     0.4621     2.7467     1.5301 F
27 C27    -0.5636     5.2516    -0.0106 C
28 F28     0.5011     4.0345    -1.7368 F
29 F29     1.6893     4.4996     0.0491 F
30 C30    -0.0522     6.7117    -0.2554 C
31 F31    -1.6810     5.0839    -0.7455 F
32 F32    -0.8807     5.1498     1.2992 F
33 F33     0.4224     6.8444    -1.4990 F
34 F34     0.9066     7.0367     0.6144 F
35 F35    -1.0759     7.5564    -0.0944 F
36 C36     0.9329     0.1399     0.2851 C
37 O37     1.5273    -0.7695    -0.6218 O
38 O38     1.8063     0.3132     1.3839 O
39 C39     2.7372    -1.1480    -0.0623 C
40 C40     2.9023    -0.4998     1.1466 C
41 C41     4.0171    -0.6852     1.9292 C
42 C42     4.9893    -1.5728     1.4378 C
43 C43     4.8124    -2.2207     0.2174 C
44 C44     3.6681    -2.0226    -0.5735 C
45 H45     4.1429    -0.1750     2.8749 H
46 H46     5.8831    -1.7491     2.0208 H
47 H47     3.5213    -2.5210    -1.5212 H
48 I48     6.3059    -3.5494    -0.4791 I
@<TRIPOS>BOND
1 1 2 1
2 1 7 1
3 1 8 1
4 1 36 1
5 2 3 1
6 2 9 1
7 2 10 1
8 3 4 1
9 3 11 1
10 3 12 1
11 4 5 1
12 4 13 1
13 4 14 1
14 5 6 1
15 5 15 1
16 5 16 1
17 6 17 1
18 6 18 1
19 6 19 1
20 20 21 1
21 20 22 1
22 20 23 1
23 20 36 1
24 21 24 1
25 21 25 1
26 21 26 1
27 24 27 1
28 24 28 1
29 24 29 1
30 27 30 1
31 27 31 1
32 27 32 1
33 30 33 1
34 30 34 1
35 30 35 1
36 36 37 1
37 36 38 1
38 37 39 1
39 38 40 1
40 39 40 2
41 39 44 2
42 40 41 2
43 41 42 Ar
44 41 45 1
45 42 43 Ar
46 42 46 1
47 43 44 Ar
48 43 48 1
49 44 47 1

#  Title
# Created by Agui 10.1.7
#

#
#

@<TRIPOS>MOLECULE
33_b_xiii_cl2
50 49
SMALL
NO_CHARGES


@<TRIPOS>ATOM
1 C1    -0.7611    -0.5332     0.8836 C
2 C2    -1.6421    -1.3379    -0.1352 C
3 C3    -2.7734    -2.1972     0.5508 C
4 C4    -3.3568    -3.3147    -0.3915 C
5 C5    -4.7459    -3.8718     0.0822 C
6 C6    -5.1613    -5.2279    -0.5828 C
7 F7    -0.0087    -1.4354     1.5581 F
8 F8    -1.5751     0.0854     1.7685 F
9 F9    -0.8362    -2.1586    -0.8424 F
10 F10    -2.2424    -0.4785    -0.9828 F
11 F11    -2.2830    -2.7935     1.6561 F
12 F12    -3.7739    -1.3659     0.9123 F
13 F13    -2.4731    -4.3345    -0.4405 F
14 F14    -3.5095    -2.8119    -1.6354 F
15 F15    -4.7209    -4.0670     1.4190 F
16 F16    -5.6994    -2.9653    -0.2101 F
17 F17    -4.3971    -6.2302    -0.1446 F
18 F18    -5.0608    -5.1504    -1.9143 F
19 F19    -6.4321    -5.4896    -0.2621 F
20 C20    -0.2242     1.8278    -0.4327 C
21 C21    -1.2938     2.7291     0.2765 C
22 F22    -0.6836     1.4809    -1.6489 F
23 F23     0.8951     2.5777    -0.6100 F
24 C24    -1.3915     4.1828    -0.3212 C
25 F25    -2.5002     2.1309     0.1550 F
26 F26    -0.9870     2.8364     1.5853 F
27 C27    -2.7241     4.9233     0.0544 C
28 F28    -1.3125     4.1203    -1.6669 F
29 F29    -0.3490     4.9057     0.1421 F
30 C30    -2.6898     6.4734    -0.1689 C
31 F31    -3.7249     4.4252    -0.6983 F
32 F32    -3.0069     4.7087     1.3584 F
33 F33    -2.2664     6.7631    -1.4040 F
34 F34    -1.8889     7.0676     0.7180 F
35 F35    -3.9270     6.9549    -0.0145 F
36 C36     0.2769     0.5248     0.3226 C
37 O37     1.1440    -0.1403    -0.5796 O
38 O38     1.0416     0.9432     1.4420 O
39 C39     2.3963    -0.1321    -0.0005 C
40 C40     2.3318     0.5185     1.2211 C
41 C41     3.4306     0.6823     2.0330 C
42 C42     4.6418     0.1520     1.5626 C
43 C43     4.6794    -0.4951     0.3342 C
44 C44     3.5625    -0.6640    -0.4966 C
45 H45     3.3673     1.1927     2.9845 H
46 H46     5.5357     0.2536     2.1626 H
47 H47     3.6035    -1.1708    -1.4502 H
48 I48     6.5280    -1.2780    -0.3272 I
49 Cl49     5.9750    -3.4860     0.7768 Cl
50 Cl50     7.0581     0.9338    -1.4346 Cl
@<TRIPOS>BOND
1 1 2 1
2 1 7 1
3 1 8 1
4 1 36 1
5 2 3 1
6 2 9 1
7 2 10 1
8 3 4 1
9 3 11 1
10 3 12 1
11 4 5 1
12 4 13 1
13 4 14 1
14 5 6 1
15 5 15 1
16 5 16 1
17 6 17 1
18 6 18 1
19 6 19 1
20 20 21 1
21 20 22 1
22 20 23 1
23 20 36 1
24 21 24 1
25 21 25 1
26 21 26 1
27 24 27 1
28 24 28 1
29 24 29 1
30 27 30 1
31 27 31 1
32 27 32 1
33 30 33 1
34 30 34 1
35 30 35 1
36 36 37 1
37 36 38 1
38 37 39 1
39 38 40 1
40 39 40 2
41 39 44 2
42 40 41 2
43 41 42 Ar
44 41 45 1
45 42 43 Ar
46 42 46 1
47 43 44 Ar
48 43 48 1
49 44 47 1
